# Supplementary material for: Roles of m5C RNA Modification Patterns in Biochemical Recurrence and Tumor Microenvironment Characterization of Prostate Adenocarcinoma
Source: Front Immunol. 2022 May 4;13:869759. doi: 10.3389/fimmu.2022.869759 (PMC9114358; doi:10.3389/fimmu.2022.869759)
Supplement: Supplementary file 7 [file Table_1.xlsx]

## Sheet: Sheet1
Supplemental table 1: The clinical index of four PRAD patients
Patient ID	Gender	Age	pTNM	Stage	Gleason score
1	Male	70	T3bN0M0	IIIB	3+4=7
2	Male	72	T2N0M0	IIB	4+3=7
3	Male	52	T2N0M0	IIB	4+4=8
4	Male	79	T3bN0M0	IIIB	4+5=9
