# Supplementary material for: Roles of m5C RNA Modification Patterns in Biochemical Recurrence and Tumor Microenvironment Characterization of Prostate Adenocarcinoma
Source: Front Immunol. 2022 May 4;13:869759. doi: 10.3389/fimmu.2022.869759 (PMC9114358; doi:10.3389/fimmu.2022.869759)
Supplement: Supplementary file 9 [file Table_3.xlsx]

## Sheet: Sheet1
Supplemental table 3: The distinct biological process and potential pathways between two m5C modification patterns via GSVA enrichment analysis.
id	logFC	AveExpr	t	P.Value	adj.P.Val	B
KEGG_PURINE_METABOLISM	-0.197924	-0.0324172	-11.6492	7.39135e-28	9.10151e-26	52.4656
KEGG_CELL_CYCLE	-0.293563	-0.0393642	-11.6187	9.78657e-28	9.10151e-26	52.1895
KEGG_PENTOSE_PHOSPHATE_PATHWAY	-0.282371	-0.0266959	-11.4655	3.97163e-27	2.46241e-25	50.8122
KEGG_PATHOGENIC_ESCHERICHIA_COLI_INFECTION	-0.254682	-0.0388137	-10.9943	2.76292e-25	1.28476e-23	46.6418
KEGG_SPLICEOSOME	-0.309401	-0.0279006	-10.827	1.21466e-24	4.51854e-23	45.1866
KEGG_RNA_DEGRADATION	-0.285964	-0.0282052	-10.2909	1.27445e-22	3.3922e-21	40.6157
KEGG_BASAL_TRANSCRIPTION_FACTORS	-0.277027	-0.0342809	-10.2907	1.27664e-22	3.3922e-21	40.614
KEGG_PYRIMIDINE_METABOLISM	-0.212865	-0.0386816	-10.2028	2.6985e-22	6.27401e-21	39.879
KEGG_P53_SIGNALING_PATHWAY	-0.223887	-0.0404303	-10.1882	3.05497e-22	6.31361e-21	39.7572
KEGG_OOCYTE_MEIOSIS	-0.231433	-0.0293402	-10.1482	4.28739e-22	7.97455e-21	39.4245
KEGG_NUCLEOTIDE_EXCISION_REPAIR	-0.265162	-0.0332922	-9.48617	1.03516e-19	1.75037e-18	34.0405
KEGG_PRION_DISEASES	-0.197396	-0.0298705	-9.4305	1.62382e-19	2.51692e-18	33.599
KEGG_BASE_EXCISION_REPAIR	-0.253311	-0.0429434	-9.34859	3.13912e-19	4.49135e-18	32.9527
KEGG_AMINOACYL_TRNA_BIOSYNTHESIS	-0.34553	-0.0230755	-9.32042	3.93449e-19	5.18719e-18	32.7313
KEGG_DNA_REPLICATION	-0.292138	-0.0472005	-9.31276	4.18322e-19	5.18719e-18	32.6712
KEGG_FC_GAMMA_R_MEDIATED_PHAGOCYTOSIS	-0.243972	-0.0312586	-9.22585	8.36758e-19	9.72731e-18	31.9915
KEGG_ONE_CARBON_POOL_BY_FOLATE	-0.245652	-0.0402823	-9.11481	2.01615e-18	2.2059e-17	31.1296
KEGG_VALINE_LEUCINE_AND_ISOLEUCINE_BIOSYNTHESIS	-0.338196	-0.0203818	-9.10306	2.21182e-18	2.28555e-17	31.0388
KEGG_RNA_POLYMERASE	-0.234908	-0.0360123	-9.06785	2.91784e-18	2.82911e-17	30.7674
KEGG_MISMATCH_REPAIR	-0.303807	-0.0388493	-9.06254	3.04206e-18	2.82911e-17	30.7265
KEGG_AMYOTROPHIC_LATERAL_SCLEROSIS_ALS	-0.172095	-0.0337195	-9.01674	4.3565e-18	3.85861e-17	30.3746
KEGG_PROGESTERONE_MEDIATED_OOCYTE_MATURATION	-0.212034	-0.0326019	-9.00751	4.68289e-18	3.95917e-17	30.3039
KEGG_SMALL_CELL_LUNG_CANCER	-0.244776	-0.021925	-8.83111	1.84368e-17	1.49097e-16	28.9614
KEGG_CITRATE_CYCLE_TCA_CYCLE	-0.314956	-0.0139755	-8.81314	2.11754e-17	1.64109e-16	28.8258
KEGG_PATHWAYS_IN_CANCER	-0.203461	-0.0251875	-8.36497	6.28222e-16	4.67397e-15	25.5078
KEGG_PROTEASOME	-0.297174	-0.0284492	-8.32767	8.28252e-16	5.92519e-15	25.2374
KEGG_CHRONIC_MYELOID_LEUKEMIA	-0.238435	-0.0254412	-8.29184	1.07924e-15	7.43476e-15	24.9785
KEGG_BLADDER_CANCER	-0.177477	-0.0425187	-8.11181	4.02877e-15	2.67625e-14	23.6907
KEGG_GLYOXYLATE_AND_DICARBOXYLATE_METABOLISM	-0.254042	-0.028552	-8.06354	5.71487e-15	3.6654e-14	23.349
KEGG_COLORECTAL_CANCER	-0.22801	-0.0266454	-7.97645	1.06961e-14	6.63157e-14	22.7366
KEGG_APOPTOSIS	-0.213708	-0.0246404	-7.9576	1.22418e-14	7.34509e-14	22.6047
KEGG_GALACTOSE_METABOLISM	-0.198979	-0.0215127	-7.92973	1.494e-14	8.57043e-14	22.4101
KEGG_UBIQUITIN_MEDIATED_PROTEOLYSIS	-0.241701	-0.0243087	-7.92726	1.52056e-14	8.57043e-14	22.3929
KEGG_NEUROTROPHIN_SIGNALING_PATHWAY	-0.20283	-0.0247179	-7.85803	2.4879e-14	1.3384e-13	21.912
KEGG_REGULATION_OF_ACTIN_CYTOSKELETON	-0.194541	-0.0237592	-7.8563	2.5185e-14	1.3384e-13	21.9001
KEGG_NOTCH_SIGNALING_PATHWAY	-0.195126	-0.0343318	-7.81999	3.25639e-14	1.68247e-13	21.6492
KEGG_GLYCOLYSIS_GLUCONEOGENESIS	-0.16408	-0.0296839	-7.63925	1.15438e-13	5.80308e-13	20.4138
KEGG_HOMOLOGOUS_RECOMBINATION	-0.229161	-0.0475461	-7.63065	1.2253e-13	5.86235e-13	20.3557
KEGG_OLFACTORY_TRANSDUCTION	0.110599	0.100292	7.63019	1.2292e-13	5.86235e-13	20.3526
KEGG_THYROID_CANCER	-0.201682	-0.0316629	-7.58362	1.69649e-13	7.88867e-13	20.0382
KEGG_PANCREATIC_CANCER	-0.212315	-0.0278053	-7.55039	2.13293e-13	9.67622e-13	19.8149
KEGG_HUNTINGTONS_DISEASE	-0.180432	-0.0330411	-7.49276	3.16702e-13	1.37061e-12	19.4293
KEGG_LEUKOCYTE_TRANSENDOTHELIAL_MIGRATION	-0.197887	-0.0265888	-7.49269	3.16861e-13	1.37061e-12	19.4288
KEGG_SELENOAMINO_ACID_METABOLISM	-0.192798	-0.0315466	-7.47191	3.65188e-13	1.54375e-12	19.2904
KEGG_GAP_JUNCTION	-0.176138	-0.0304884	-7.41839	5.2567e-13	2.17277e-12	18.9352
KEGG_GLYCOSAMINOGLYCAN_BIOSYNTHESIS_KERATAN_SULFATE	-0.215522	-0.035556	-7.33434	9.27613e-13	3.75078e-12	18.3816
KEGG_ALZHEIMERS_DISEASE	-0.167592	-0.0310266	-7.33028	9.53284e-13	3.77257e-12	18.355
KEGG_WNT_SIGNALING_PATHWAY	-0.177509	-0.0255201	-7.23428	1.81213e-12	7.022e-12	17.7292
KEGG_ANTIGEN_PROCESSING_AND_PRESENTATION	-0.196385	-0.0174551	-7.21551	2.05307e-12	7.79328e-12	17.6076
KEGG_T_CELL_RECEPTOR_SIGNALING_PATHWAY	-0.204069	-0.0354766	-7.20656	2.17878e-12	8.10507e-12	17.5497
KEGG_SNARE_INTERACTIONS_IN_VESICULAR_TRANSPORT	-0.175673	-0.0280157	-7.16686	2.83403e-12	1.03359e-11	17.2936
KEGG_B_CELL_RECEPTOR_SIGNALING_PATHWAY	-0.197633	-0.0307603	-7.15557	3.05348e-12	1.09221e-11	17.221
KEGG_CYTOSOLIC_DNA_SENSING_PATHWAY	-0.165616	-0.0147395	-7.11027	4.11485e-12	1.43209e-11	16.9305
KEGG_TIGHT_JUNCTION	-0.158429	-0.0177596	-7.10869	4.15768e-12	1.43209e-11	16.9204
KEGG_RENAL_CELL_CARCINOMA	-0.201026	-0.025966	-7.0492	6.13736e-12	2.07554e-11	16.5413
KEGG_NON_HOMOLOGOUS_END_JOINING	-0.246873	-0.0298915	-7.04612	6.26195e-12	2.07986e-11	16.5218
KEGG_VIRAL_MYOCARDITIS	-0.206892	-0.0175135	-7.03945	6.54018e-12	2.13416e-11	16.4795
KEGG_ACUTE_MYELOID_LEUKEMIA	-0.192274	-0.0255061	-7.03322	6.81112e-12	2.18425e-11	16.44
KEGG_ALANINE_ASPARTATE_AND_GLUTAMATE_METABOLISM	-0.140334	-0.0274272	-7.02505	7.18341e-12	2.25488e-11	16.3882
KEGG_MELANOMA	-0.154316	-0.0267467	-7.02312	7.2738e-12	2.25488e-11	16.376
KEGG_GLYCOSAMINOGLYCAN_BIOSYNTHESIS_CHONDROITIN_SULFATE	-0.186336	-0.0380129	-7.01572	7.63282e-12	2.32739e-11	16.3291
KEGG_CHEMOKINE_SIGNALING_PATHWAY	-0.185432	-0.0315225	-6.97932	9.66535e-12	2.89961e-11	16.0994
KEGG_TGF_BETA_SIGNALING_PATHWAY	-0.18831	-0.0340196	-6.96501	1.06028e-11	3.13034e-11	16.0093
KEGG_TOLL_LIKE_RECEPTOR_SIGNALING_PATHWAY	-0.180301	-0.0231578	-6.93903	1.2539e-11	3.64414e-11	15.8462
KEGG_LINOLEIC_ACID_METABOLISM	0.127961	-0.0162723	6.8257	2.59076e-11	7.41357e-11	15.1405
KEGG_MTOR_SIGNALING_PATHWAY	-0.169086	-0.0288844	-6.79701	3.10843e-11	8.76012e-11	14.9634
KEGG_GLIOMA	-0.166526	-0.0291682	-6.7535	4.09325e-11	1.13634e-10	14.6959
KEGG_CYSTEINE_AND_METHIONINE_METABOLISM	-0.146569	-0.0328436	-6.73003	4.74543e-11	1.29802e-10	14.5522
KEGG_NOD_LIKE_RECEPTOR_SIGNALING_PATHWAY	-0.187487	-0.0384869	-6.70138	5.68112e-11	1.53143e-10	14.3774
KEGG_NON_SMALL_CELL_LUNG_CANCER	-0.182023	-0.0322097	-6.67557	6.67756e-11	1.77432e-10	14.2204
KEGG_RIG_I_LIKE_RECEPTOR_SIGNALING_PATHWAY	-0.150989	-0.0136506	-6.65397	7.64167e-11	2.0019e-10	14.0894
KEGG_FOCAL_ADHESION	-0.190476	-0.019969	-6.59988	1.06946e-10	2.76278e-10	13.763
KEGG_VASOPRESSIN_REGULATED_WATER_REABSORPTION	-0.188046	-0.0241464	-6.58335	1.1847e-10	3.01855e-10	13.6637
KEGG_INSULIN_SIGNALING_PATHWAY	-0.152272	-0.025264	-6.52086	1.74073e-10	4.37534e-10	13.2902
KEGG_PYRUVATE_METABOLISM	-0.150581	-0.0312413	-6.43138	3.00514e-10	7.45274e-10	12.7604
KEGG_LEISHMANIA_INFECTION	-0.213422	-0.0318239	-6.3965	3.71177e-10	9.08407e-10	12.5556
KEGG_NATURAL_KILLER_CELL_MEDIATED_CYTOTOXICITY	-0.165627	-0.0241866	-6.37508	4.22384e-10	1.0203e-09	12.4303
KEGG_ALPHA_LINOLENIC_ACID_METABOLISM	0.120898	-0.0338893	6.35963	4.6355e-10	1.10539e-09	12.3402
KEGG_VEGF_SIGNALING_PATHWAY	-0.119083	-0.0333223	-6.29419	6.85968e-10	1.61506e-09	11.9603
KEGG_MAPK_SIGNALING_PATHWAY	-0.134024	-0.0251147	-6.26425	8.19801e-10	1.90604e-09	11.7876
KEGG_VIBRIO_CHOLERAE_INFECTION	-0.150754	-0.0326212	-6.25609	8.60508e-10	1.97598e-09	11.7407
KEGG_FC_EPSILON_RI_SIGNALING_PATHWAY	-0.132682	-0.0363418	-6.24274	9.31352e-10	2.11258e-09	11.664
KEGG_ADHERENS_JUNCTION	-0.196316	-0.0208962	-6.19946	1.20277e-09	2.69536e-09	11.4164
KEGG_ENDOCYTOSIS	-0.152529	-0.028451	-6.17059	1.4253e-09	3.15602e-09	11.252
KEGG_HEDGEHOG_SIGNALING_PATHWAY	-0.14987	-0.0329222	-6.1565	1.54805e-09	3.38751e-09	11.172
KEGG_EPITHELIAL_CELL_SIGNALING_IN_HELICOBACTER_PYLORI_INFECTION	-0.149002	-0.0310026	-6.15214	1.58804e-09	3.4346e-09	11.1473
KEGG_O_GLYCAN_BIOSYNTHESIS	-0.163393	-0.0277053	-6.14442	1.66148e-09	3.55212e-09	11.1036
KEGG_GLYCEROLIPID_METABOLISM	-0.116882	-0.0214986	-6.09751	2.1841e-09	4.6164e-09	10.8389
KEGG_ENDOMETRIAL_CANCER	-0.183279	-0.0204775	-6.0116	3.58837e-09	7.4993e-09	10.3586
KEGG_FOLATE_BIOSYNTHESIS	-0.169605	-0.0301033	-5.95768	4.88606e-09	9.99284e-09	10.0602
KEGG_ECM_RECEPTOR_INTERACTION	-0.191479	-0.0203496	-5.95758	4.88897e-09	9.99284e-09	10.0596
KEGG_LONG_TERM_POTENTIATION	-0.139037	-0.0282358	-5.95274	5.02573e-09	1.01607e-08	10.033
KEGG_PROSTATE_CANCER	-0.158591	-0.0270515	-5.86048	8.47514e-09	1.69503e-08	9.52808
KEGG_AMINO_SUGAR_AND_NUCLEOTIDE_SUGAR_METABOLISM	-0.154626	-0.0310794	-5.78383	1.30165e-08	2.57561e-08	9.11381
KEGG_ADIPOCYTOKINE_SIGNALING_PATHWAY	-0.1289	-0.0255761	-5.77987	1.33066e-08	2.60529e-08	9.09255
KEGG_AXON_GUIDANCE	-0.149781	-0.0319154	-5.76952	1.40944e-08	2.73079e-08	9.03704
KEGG_PROTEIN_EXPORT	-0.218198	-0.0277758	-5.76606	1.43683e-08	2.75516e-08	9.01846
KEGG_PANTOTHENATE_AND_COA_BIOSYNTHESIS	-0.137722	-0.026938	-5.75169	1.55603e-08	2.95328e-08	8.94156
KEGG_N_GLYCAN_BIOSYNTHESIS	-0.19466	-0.022363	-5.61912	3.22171e-08	6.05291e-08	8.23978
KEGG_GNRH_SIGNALING_PATHWAY	-0.11311	-0.0273627	-5.56006	4.43528e-08	8.24961e-08	7.9318
KEGG_MELANOGENESIS	-0.125234	-0.026581	-5.53144	5.17344e-08	9.52733e-08	7.78355
KEGG_FRUCTOSE_AND_MANNOSE_METABOLISM	-0.131054	-0.0343067	-5.37377	1.19379e-07	2.17692e-07	6.97908
KEGG_GLYCOSAMINOGLYCAN_BIOSYNTHESIS_HEPARAN_SULFATE	-0.121988	-0.0323555	-5.30447	1.71307e-07	3.0935e-07	6.63206
KEGG_PORPHYRIN_AND_CHLOROPHYLL_METABOLISM	-0.119118	-0.0115174	-5.29701	1.78061e-07	3.18456e-07	6.59491
KEGG_DORSO_VENTRAL_AXIS_FORMATION	-0.173731	-0.021284	-5.2393	2.3974e-07	4.24682e-07	6.30934
KEGG_ERBB_SIGNALING_PATHWAY	-0.141707	-0.0271735	-5.23156	2.49447e-07	4.37709e-07	6.27125
KEGG_TYPE_II_DIABETES_MELLITUS	-0.114821	-0.0248702	-5.21983	2.64885e-07	4.60454e-07	6.21362
KEGG_LYSINE_DEGRADATION	-0.157006	-0.0253899	-5.20511	2.85576e-07	4.91826e-07	6.14145
KEGG_BASAL_CELL_CARCINOMA	-0.139408	-0.0284951	-5.18878	3.10361e-07	5.29608e-07	6.06161
KEGG_PROXIMAL_TUBULE_BICARBONATE_RECLAMATION	-0.120528	-0.0262014	-5.1695	3.42309e-07	5.78813e-07	5.96764
KEGG_CELL_ADHESION_MOLECULES_CAMS	-0.160002	-0.0235839	-5.16738	3.46007e-07	5.79796e-07	5.95733
KEGG_LONG_TERM_DEPRESSION	-0.103955	-0.0282268	-5.02572	7.03958e-07	1.15873e-06	5.27679
KEGG_CALCIUM_SIGNALING_PATHWAY	-0.11448	-0.0206299	-4.98236	8.72018e-07	1.42277e-06	5.07191
KEGG_GLYCOSAMINOGLYCAN_DEGRADATION	-0.13713	-0.0247235	-4.91551	1.20935e-06	1.95599e-06	4.75917
KEGG_REGULATION_OF_AUTOPHAGY	-0.107508	0.01463	-4.89252	1.35221e-06	2.1682e-06	4.65245
KEGG_JAK_STAT_SIGNALING_PATHWAY	-0.120642	-0.0219218	-4.82853	1.84058e-06	2.91224e-06	4.35795
KEGG_ABC_TRANSPORTERS	-0.110346	-0.0257063	-4.82774	1.84755e-06	2.91224e-06	4.35434
KEGG_LYSOSOME	-0.134676	-0.0256233	-4.68755	3.58751e-06	5.60737e-06	3.72149
KEGG_GLYCOSPHINGOLIPID_BIOSYNTHESIS_GANGLIO_SERIES	-0.142526	-0.0326181	-4.60853	5.17699e-06	7.95802e-06	3.37232
KEGG_PRIMARY_IMMUNODEFICIENCY	-0.167839	-0.0352835	-4.50915	8.15046e-06	1.23251e-05	2.94088
KEGG_VASCULAR_SMOOTH_MUSCLE_CONTRACTION	-0.108292	-0.0231231	-4.44366	1.09417e-05	1.638e-05	2.66132
KEGG_PHOSPHATIDYLINOSITOL_SIGNALING_SYSTEM	-0.12895	-0.0221266	-4.44231	1.10081e-05	1.638e-05	2.65559
KEGG_PARKINSONS_DISEASE	-0.128003	-0.0314768	-4.30057	2.05631e-05	3.0355e-05	2.06359
KEGG_CIRCADIAN_RHYTHM_MAMMAL	-0.151888	-0.0212065	-4.27245	2.32295e-05	3.40211e-05	1.94827
KEGG_INOSITOL_PHOSPHATE_METABOLISM	-0.124314	-0.0258609	-4.216	2.96117e-05	4.30295e-05	1.71887
KEGG_RIBOSOME	-0.212691	-0.0256254	-4.16545	3.67171e-05	5.29409e-05	1.51585
KEGG_TYPE_I_DIABETES_MELLITUS	-0.149943	-0.02071	-4.1125	4.58888e-05	6.56563e-05	1.30561
KEGG_INTESTINAL_IMMUNE_NETWORK_FOR_IGA_PRODUCTION	-0.147442	-0.0247445	-3.98686	7.71409e-05	0.000109528	0.81686
KEGG_ARRHYTHMOGENIC_RIGHT_VENTRICULAR_CARDIOMYOPATHY_ARVC	-0.117209	-0.017472	-3.81224	0.000155243	0.000215486	0.161216
KEGG_COMPLEMENT_AND_COAGULATION_CASCADES	-0.108678	-0.009688	-3.80926	0.000157069	0.000216406	0.150281
KEGG_ALLOGRAFT_REJECTION	-0.154976	-0.0240628	-3.72163	0.00022086	0.000299853	-0.168104
KEGG_ASTHMA	-0.141053	-0.020968	-3.69167	0.00024777	0.00033395	-0.275318
KEGG_GRAFT_VERSUS_HOST_DISEASE	-0.147406	-0.0230306	-3.68144	0.000257649	0.000344768	-0.311758
KEGG_DILATED_CARDIOMYOPATHY	-0.104099	-0.0137093	-3.57013	0.000391918	0.000504566	-0.701948
KEGG_AUTOIMMUNE_THYROID_DISEASE	-0.112397	0.0012808	-3.367	0.000819601	0.00102313	-1.38468
KEGG_GLYCOSPHINGOLIPID_BIOSYNTHESIS_GLOBO_SERIES	-0.10467	-0.0240331	-3.32227	0.000959518	0.00118192	-1.52988
KEGG_GLYCOSYLPHOSPHATIDYLINOSITOL_GPI_ANCHOR_BIOSYNTHESIS	-0.111306	-0.0282254	-3.21926	0.00137033	0.00167686	-1.85724
KEGG_OTHER_GLYCAN_DEGRADATION	-0.108827	-0.0287083	-3.21168	0.00140624	0.00170955	-1.88095
