# Supplementary material for: Roles of m5C RNA Modification Patterns in Biochemical Recurrence and Tumor Microenvironment Characterization of Prostate Adenocarcinoma
Source: Front Immunol. 2022 May 4;13:869759. doi: 10.3389/fimmu.2022.869759 (PMC9114358; doi:10.3389/fimmu.2022.869759)
Supplement: Supplementary file 10 [file Table_4.xlsx]

## Sheet: Sheet1
Supplemental table 4: DEGs (│log2(Fold change) │ > 1 and FDR < 0.001) between two m5C modification patterns.
id	logFC	AveExpr	t	P.Value	adj.P.Val	B
YBX1	-178.505	495.934	-22.0866	4.83e-75	2.63e-70	160.101
YBX1P10	-3.43757	7.66859	-14.5031	9.12e-40	2.48e-35	79.5811
PTMA	-143.829	522.304	-12.2597	3.08e-30	4.49e-26	57.853
CCT6A	-39.6705	130.416	-12.2522	3.3e-30	4.49e-26	57.7833
APEX1	-77.9313	263.946	-11.5138	3.03e-27	3.29e-23	51.0349
CTPS1	-5.95973	17.2895	-11.4918	3.69e-27	3.35e-23	50.8382
DPH2	-8.82947	26.8599	-11.3147	1.83e-26	1.42e-22	49.2553
NCL	-72.2015	280.588	-11.2583	3.04e-26	2.06e-22	48.7549
RCC2	-35.5379	95.2012	-11.2057	4.87e-26	2.94e-22	48.2886
CCT5	-24.611	73.4408	-11.1136	1.11e-25	6.02e-22	47.4763
UTP14A	-4.54031	18.6389	-11.0165	2.62e-25	1.3e-21	46.6242
PPA1	-22.1841	69.2468	-10.9339	5.44e-25	2.47e-21	45.9024
UTP11	-5.02	26.6715	-10.6908	4.58e-24	1.92e-20	43.7975
NONO	-60.2802	244.113	-10.6065	9.51e-24	3.7e-20	43.0746
HNRNPAB	-47.8564	200.454	-10.5378	1.72e-23	6.25e-20	42.4882
FTSJ1	-7.26388	34.4877	-10.5086	2.22e-23	7.53e-20	42.2394
HNRNPC	-37.1151	173.171	-10.4624	3.3e-23	1.05e-19	41.8469
HTRA2	-4.98651	23.1963	-10.4399	4e-23	1.17e-19	41.6558
NPM1	-139.42	461.133	-10.4378	4.07e-23	1.17e-19	41.6381
RAN	-35.8309	130.955	-10.3896	6.16e-23	1.62e-19	41.23
CCT2	-28.0759	105.021	-10.387	6.29e-23	1.62e-19	41.2082
CDK4	-17.6779	65.8138	-10.3821	6.57e-23	1.62e-19	41.1666
RAD23A	-22.8229	122.628	-10.3716	7.18e-23	1.7e-19	41.0784
AK2	-10.9783	54.3966	-10.3035	1.28e-22	2.91e-19	40.5051
OLA1	-13.2351	46.7042	-10.2858	1.49e-22	3.25e-19	40.3559
SERBP1	-29.1385	114.245	-10.2481	2.05e-22	4.3e-19	40.0404
CMSS1	-3.45417	13.0839	-10.2308	2.38e-22	4.78e-19	39.8953
SLC25A5	-137.885	419.091	-10.2269	2.46e-22	4.78e-19	39.8627
ENO1	-174.617	524.418	-10.1815	3.61e-22	6.77e-19	39.4835
SNW1	-14.7661	76.5845	-10.1766	3.76e-22	6.82e-19	39.4427
UQCRC2	-22.9353	94.9862	-10.102	7.06e-22	1.24e-18	38.8219
NOC2L	-14.238	64.0977	-10.0895	7.83e-22	1.3e-18	38.7187
MTHFD1	-6.02056	19.4423	-10.0887	7.89e-22	1.3e-18	38.712
SERPINH1	-19.8207	62.5306	-10.0723	9.05e-22	1.45e-18	38.5761
NOP56	-12.7719	58.6088	-10.0466	1.12e-21	1.75e-18	38.363
PSMD6	-4.65726	21.3414	-10.0363	1.22e-21	1.85e-18	38.2785
CCT3	-67.6995	264.601	-10.0145	1.47e-21	2.16e-18	38.0985
DKC1	-14.2773	56.0324	-9.99659	1.71e-21	2.44e-18	37.9504
BID	-3.5858	14.3469	-9.98457	1.89e-21	2.63e-18	37.8514
SSRP1	-17.1517	79.4712	-9.97234	2.09e-21	2.84e-18	37.7507
FARSB	-10.4678	46.3996	-9.96187	2.28e-21	3.02e-18	37.6646
TRAF7	-19.3771	63.4158	-9.94229	2.68e-21	3.47e-18	37.5037
ADSL	-7.66135	32.8444	-9.93806	2.78e-21	3.52e-18	37.469
CDC123	-12.0876	59.7716	-9.90039	3.8e-21	4.7e-18	37.1601
STIP1	-29.7936	111.998	-9.83562	6.5e-21	7.85e-18	36.6308
NIFK	-11.8031	49.2929	-9.76912	1.12e-20	1.33e-17	36.0898
LYAR	-4.94018	17.7531	-9.71623	1.74e-20	2.01e-17	35.6612
ELAVL1	-7.34822	42.4628	-9.68917	2.17e-20	2.46e-17	35.4426
CHCHD3	-7.54462	33.7253	-9.65325	2.91e-20	3.23e-17	35.153
MACROH2A1	-7.32117	30.2594	-9.64161	3.2e-20	3.48e-17	35.0593
PSMA6	-2.69137	9.90342	-9.63905	3.26e-20	3.48e-17	35.0386
ELK1	-9.6488	36.362	-9.63226	3.45e-20	3.61e-17	34.9841
OXA1L	-10.9711	68.633	-9.62504	3.66e-20	3.75e-17	34.926
PSMF1	-12.7675	76.9273	-9.61776	3.88e-20	3.91e-17	34.8675
POGLUT2	-1.66156	4.4651	-9.61152	4.08e-20	4.04e-17	34.8174
SLC25A3	-24.6683	123.656	-9.56885	5.78e-20	5.61e-17	34.4754
LMNB2	-9.29837	29.8222	-9.55105	6.67e-20	6.37e-17	34.333
COLGALT1	-9.13622	41.8108	-9.48681	1.12e-19	1.05e-16	33.8205
DUSP7	-3.51201	13.26	-9.47825	1.2e-19	1.1e-16	33.7524
GRPEL1	-5.71611	28.7738	-9.47378	1.25e-19	1.1e-16	33.7168
PA2G4	-20.6133	109.793	-9.47251	1.26e-19	1.1e-16	33.7067
TUBA1B	-29.8205	90.71	-9.47202	1.26e-19	1.1e-16	33.7029
TRAP1	-11.4182	38.9647	-9.47145	1.27e-19	1.1e-16	33.6983
MCM3	-12.5022	49.123	-9.46638	1.32e-19	1.12e-16	33.658
MCM6	-5.98991	15.7424	-9.45735	1.42e-19	1.19e-16	33.5863
VARS1	-12.6091	48.637	-9.43944	1.64e-19	1.36e-16	33.4441
RSL1D1	-25.8719	100.739	-9.43626	1.69e-19	1.36e-16	33.4189
PGAM5	-9.77445	36.5525	-9.43572	1.69e-19	1.36e-16	33.4146
WDR12	-2.50954	8.59439	-9.42363	1.87e-19	1.47e-16	33.3188
NOP14	-11.8431	44.3547	-9.41603	1.98e-19	1.54e-16	33.2586
KHDRBS1	-23.1456	131.568	-9.36224	3.05e-19	2.32e-16	32.8336
UBA2	-13.9794	57.5302	-9.3613	3.08e-19	2.32e-16	32.8261
SZRD1	-13.6279	80.818	-9.35258	3.3e-19	2.46e-16	32.7574
U2AF2	-27.3001	129.02	-9.35005	3.37e-19	2.47e-16	32.7374
SF3A3	-8.01358	47.6396	-9.33714	3.73e-19	2.71e-16	32.6358
AIMP2	-10.6209	36.7696	-9.30821	4.7e-19	3.37e-16	32.4083
DNAJC7	-4.64096	24.5387	-9.27771	5.99e-19	4.23e-16	32.1689
SEC11A	-12.1115	58.0635	-9.27277	6.23e-19	4.35e-16	32.1303
SDHB	-13.6259	73.822	-9.25689	7.07e-19	4.87e-16	32.0059
STX6	-5.73174	19.5305	-9.24168	7.98e-19	5.43e-16	31.887
PPP1R8	-8.80171	47.4313	-9.23993	8.09e-19	5.43e-16	31.8733
PLOD3	-9.39828	36.733	-9.21554	9.82e-19	6.51e-16	31.6828
IFT52	-7.16022	32.4256	-9.21352	9.97e-19	6.54e-16	31.6671
CCT4	-41.6258	182.702	-9.20667	1.05e-18	6.82e-16	31.6137
KPNB1	-28.7384	105.616	-9.17397	1.36e-18	8.73e-16	31.3591
SET	-54.0273	221.845	-9.16015	1.52e-18	9.62e-16	31.2517
GNL2	-7.00523	34.6137	-9.15836	1.54e-18	9.64e-16	31.2378
PDCD2	-4.74317	24.5219	-9.15611	1.57e-18	9.7e-16	31.2203
E2F3	-3.89425	9.12121	-9.15162	1.63e-18	9.94e-16	31.1854
SCFD2	-4.02725	16.241	-9.14395	1.73e-18	1.04e-15	31.1259
DESI1	-7.75541	35.5329	-9.14339	1.73e-18	1.04e-15	31.1216
RNF130	-4.03249	19.2809	-9.13369	1.87e-18	1.11e-15	31.0463
PHF5A	-8.38572	49.4424	-9.1301	1.93e-18	1.13e-15	31.0185
TKT	-21.514	67.7139	-9.12691	1.98e-18	1.14e-15	30.9938
OAF	-8.01495	22.006	-9.12234	2.05e-18	1.17e-15	30.9583
MRPS27	-7.79557	33.1557	-9.1149	2.17e-18	1.23e-15	30.9008
COA7	-4.51044	14.6554	-9.11145	2.23e-18	1.25e-15	30.874
HDGF	-39.3225	177.582	-9.09104	2.62e-18	1.45e-15	30.7162
VDAC1	-43.217	188.889	-9.0811	2.83e-18	1.56e-15	30.6394
HNRNPUL1	-29.0834	121.48	-9.07705	2.92e-18	1.59e-15	30.6082
MAIP1	-5.42387	26.8701	-9.07544	2.96e-18	1.59e-15	30.5958
RHOA	-93.6942	483.504	-9.07392	2.99e-18	1.6e-15	30.584
TCF3	-8.61174	33.7938	-9.06842	3.13e-18	1.65e-15	30.5416
SLC25A19	-1.16495	3.98395	-9.06681	3.17e-18	1.66e-15	30.5292
KCMF1	-4.00556	21.8655	-9.06425	3.23e-18	1.67e-15	30.5095
TMEM183A	-6.36192	30.1947	-9.06186	3.29e-18	1.69e-15	30.491
CBX1	-17.5079	69.3896	-9.05164	3.56e-18	1.81e-15	30.4123
HNRNPA1	-85.6023	383.222	-9.03966	3.91e-18	1.97e-15	30.32
DBN1	-18.6733	48.6375	-9.0228	4.47e-18	2.23e-15	30.1903
P3H1	-3.38452	14.1222	-9.02099	4.53e-18	2.24e-15	30.1764
CDK2AP1	-28.6967	84.2267	-9.00146	5.27e-18	2.58e-15	30.0265
HSPD1	-92.8714	274.04	-8.98769	5.87e-18	2.85e-15	29.9208
ABCF2	-8.1709	39.3001	-8.97789	6.34e-18	3.05e-15	29.8458
TUBB	-104.099	422.716	-8.97657	6.4e-18	3.05e-15	29.8357
ATP5PB	-23.9227	125.189	-8.97276	6.59e-18	3.1e-15	29.8065
XRCC5	-38.3593	158.928	-8.97237	6.61e-18	3.1e-15	29.8035
DDX10	-2.36794	9.99643	-8.96987	6.74e-18	3.13e-15	29.7844
LTV1	-6.52239	29.1147	-8.96714	6.89e-18	3.17e-15	29.7635
C1orf174	-2.65585	13.7829	-8.95055	7.83e-18	3.58e-15	29.6366
MRPL44	-13.0917	62.1819	-8.93819	8.62e-18	3.91e-15	29.5422
EIF2S1	-8.20869	35.1003	-8.93546	8.81e-18	3.96e-15	29.5213
MOCS1	-2.91963	7.60415	-8.93412	8.9e-18	3.97e-15	29.5111
EIF2S3	-50.8289	189.519	-8.9132	1.05e-17	4.63e-15	29.3516
DCLRE1B	-1.46017	4.42528	-8.91028	1.07e-17	4.7e-15	29.3293
UBE2Q1	-11.3587	60.5707	-8.88966	1.26e-17	5.46e-15	29.1724
DNAAF5	-4.27309	15.0787	-8.88705	1.28e-17	5.53e-15	29.1525
EFTUD2	-4.68175	21.572	-8.88481	1.3e-17	5.58e-15	29.1355
PRPF38A	-5.41629	27.4186	-8.88056	1.35e-17	5.72e-15	29.1032
HNRNPL	-17.218	96.8188	-8.873	1.43e-17	6.02e-15	29.0458
RCL1	-1.99155	8.18366	-8.85527	1.64e-17	6.85e-15	28.9112
IMMT	-12.6504	56.2409	-8.85085	1.69e-17	7.03e-15	28.8777
LAMC1	-31.1465	68.2495	-8.83671	1.89e-17	7.78e-15	28.7706
NOL11	-5.96015	27.512	-8.83086	1.97e-17	8.08e-15	28.7263
CPSF3	-5.37826	27.6275	-8.82585	2.05e-17	8.33e-15	28.6883
GTPBP4	-5.0437	22.6047	-8.82134	2.12e-17	8.56e-15	28.6542
THOC7	-14.4829	73.8847	-8.81637	2.21e-17	8.77e-15	28.6166
MRPL3	-28.1418	106.235	-8.81625	2.21e-17	8.77e-15	28.6157
PTBP1	-21.7758	114.009	-8.81168	2.29e-17	8.99e-15	28.5812
VDAC2	-12.3129	64.9073	-8.81049	2.31e-17	8.99e-15	28.5722
FLII	-15.4363	71.0058	-8.8102	2.31e-17	8.99e-15	28.57
BZW2	-15.9182	46.3789	-8.80368	2.43e-17	9.39e-15	28.5207
FH	-20.4088	96.8469	-8.80153	2.47e-17	9.47e-15	28.5045
CCT8	-38.6763	172.259	-8.78356	2.84e-17	1.08e-14	28.3689
UTP18	-8.32858	37.8687	-8.76487	3.28e-17	1.24e-14	28.2281
DNAJA3	-6.27306	28.5387	-8.75854	3.44e-17	1.29e-14	28.1805
HNRNPK	-79.3682	364.025	-8.75704	3.48e-17	1.3e-14	28.1692
MTA2	-14.8461	81.1933	-8.74154	3.91e-17	1.44e-14	28.0527
CCDC51	-4.6435	19.2636	-8.74125	3.92e-17	1.44e-14	28.0505
NKIRAS2	-4.27128	26.3726	-8.73245	4.2e-17	1.53e-14	27.9844
CSDE1	-79.983	362.581	-8.73066	4.25e-17	1.54e-14	27.9709
CCT7	-48.3519	259.526	-8.7293	4.3e-17	1.55e-14	27.9607
PHC2	-11.7888	65.1557	-8.72659	4.39e-17	1.57e-14	27.9404
RIOK1	-4.40257	19.0155	-8.72377	4.48e-17	1.58e-14	27.9192
PDCD2L	-4.18687	16.7349	-8.72313	4.5e-17	1.58e-14	27.9144
PAICS	-19.6858	66.2398	-8.72289	4.51e-17	1.58e-14	27.9126
SF3B2	-11.814	75.8149	-8.71259	4.88e-17	1.7e-14	27.8354
ABCB7	-5.09773	20.8751	-8.70523	5.16e-17	1.79e-14	27.7802
LDHA	-66.4176	161.735	-8.70065	5.35e-17	1.84e-14	27.746
SEH1L	-3.2202	12.2854	-8.69037	5.78e-17	1.98e-14	27.669
HNRNPA0	-15.0918	72.6294	-8.68344	6.09e-17	2.07e-14	27.6171
TOMM34	-14.9548	64.9675	-8.68077	6.22e-17	2.1e-14	27.5972
RUVBL1	-7.69324	25.1823	-8.67993	6.26e-17	2.1e-14	27.5909
TIPRL	-9.01332	40.3577	-8.67494	6.5e-17	2.17e-14	27.5536
PELO	-4.2847	18.5582	-8.65387	7.63e-17	2.53e-14	27.3963
POLE3	-16.8017	72.7984	-8.65314	7.67e-17	2.53e-14	27.3908
PDCL3	-10.6435	50.498	-8.64678	8.05e-17	2.64e-14	27.3434
PPP1R9B	-11.2341	41.1708	-8.64448	8.19e-17	2.67e-14	27.3263
LTA4H	-8.89354	40.1568	-8.64014	8.46e-17	2.74e-14	27.2939
KNOP1	-1.88102	6.56775	-8.62969	9.16e-17	2.95e-14	27.2162
BFAR	-7.46778	36.1979	-8.62694	9.35e-17	2.99e-14	27.1957
YARS2	-4.44639	21.4167	-8.61931	9.91e-17	3.15e-14	27.1389
PUM3	-7.76867	33.1903	-8.61793	1e-16	3.15e-14	27.1287
PPID	-7.88416	36.2549	-8.6178	1e-16	3.15e-14	27.1277
EBNA1BP2	-9.84233	50.6417	-8.60727	1.08e-16	3.39e-14	27.0494
ACTR3	-9.8162	38.3573	-8.60404	1.11e-16	3.46e-14	27.0254
TMEM201	-1.74856	8.69459	-8.59283	1.21e-16	3.74e-14	26.9422
TTC9C	-3.47013	17.8513	-8.5899	1.24e-16	3.8e-14	26.9205
DHX37	-2.26994	10.0835	-8.5862	1.27e-16	3.89e-14	26.893
YTHDF2	-10.1596	53.6376	-8.57852	1.35e-16	4.09e-14	26.8361
KHSRP	-24.0719	116.859	-8.5738	1.4e-16	4.21e-14	26.8011
NAT10	-7.51313	35.2512	-8.57342	1.4e-16	4.21e-14	26.7983
CLNS1A	-10.5575	53.3233	-8.56635	1.48e-16	4.41e-14	26.7459
CNOT9	-6.00138	27.3182	-8.55617	1.59e-16	4.74e-14	26.6706
MRPL10	-7.79131	46.7481	-8.54654	1.71e-16	5.07e-14	26.5994
RAP1GDS1	-3.94008	17.3716	-8.5457	1.72e-16	5.07e-14	26.5932
SRSF1	-28.5085	151.547	-8.53824	1.82e-16	5.34e-14	26.5381
GALNT2	-9.3314	32.5618	-8.5354	1.86e-16	5.39e-14	26.517
CS	-18.2844	77.055	-8.5354	1.86e-16	5.39e-14	26.517
PSMD10	-10.4239	50.1304	-8.53437	1.88e-16	5.41e-14	26.5095
ABCE1	-9.90085	31.7549	-8.53029	1.94e-16	5.54e-14	26.4793
CD3EAP	-1.11781	4.28107	-8.52377	2.03e-16	5.79e-14	26.4312
WDR3	-4.7655	12.623	-8.52035	2.09e-16	5.91e-14	26.406
APBA2	-2.95311	6.68644	-8.51706	2.14e-16	6.03e-14	26.3817
PNO1	-6.193	26.5342	-8.51098	2.24e-16	6.28e-14	26.337
STRAP	-31.968	136.619	-8.49789	2.47e-16	6.89e-14	26.2405
XRCC1	-5.72579	30.5253	-8.49041	2.61e-16	7.25e-14	26.1855
PRELID3B	-20.4466	69.3976	-8.48449	2.73e-16	7.53e-14	26.142
WIZ	-5.79394	27.1801	-8.47865	2.85e-16	7.83e-14	26.099
SYNCRIP	-16.7493	56.3604	-8.47273	2.98e-16	8.14e-14	26.0555
KPNA2	-12.0159	26.5405	-8.46105	3.25e-16	8.84e-14	25.9698
RCN2	-5.4646	19.1503	-8.45164	3.49e-16	9.44e-14	25.9008
MRPL37	-18.5595	96.1899	-8.45019	3.52e-16	9.49e-14	25.8901
ARPC2	-14.0996	72.9441	-8.43415	3.97e-16	1.06e-13	25.7727
ZNHIT6	-2.57458	10.896	-8.43099	4.07e-16	1.07e-13	25.7495
PITPNB	-6.4669	33.0245	-8.43075	4.07e-16	1.07e-13	25.7478
LIMK1	-3.48915	14.3916	-8.43074	4.07e-16	1.07e-13	25.7477
MORF4L1	-17.9216	88.7378	-8.4306	4.08e-16	1.07e-13	25.7467
DCPS	-2.5917	13.0149	-8.42557	4.23e-16	1.11e-13	25.7099
BTF3L4	-5.85948	28.6873	-8.42332	4.31e-16	1.12e-13	25.6934
PDHA1	-6.32521	39.2463	-8.41464	4.59e-16	1.19e-13	25.63
SEPTIN11	-8.46591	21.571	-8.41438	4.6e-16	1.19e-13	25.6281
BAK1	-4.54134	20.5816	-8.41278	4.66e-16	1.19e-13	25.6164
XRCC6	-52.7749	293.386	-8.40382	4.98e-16	1.27e-13	25.551
GPI	-24.4713	113.264	-8.39897	5.16e-16	1.31e-13	25.5156
PARP1	-21.6821	79.1258	-8.39807	5.19e-16	1.31e-13	25.509
SNX3	-48.1246	179.157	-8.39678	5.24e-16	1.32e-13	25.4996
HDAC2	-5.56989	20.1966	-8.39452	5.33e-16	1.34e-13	25.4831
HSP90AB1	-359.783	1684.84	-8.39213	5.43e-16	1.35e-13	25.4657
AMMECR1	-3.42479	8.10987	-8.38471	5.73e-16	1.42e-13	25.4115
PRMT5	-13.4253	51.3875	-8.37541	6.14e-16	1.52e-13	25.3438
C1QBP	-27.0056	108.132	-8.36452	6.66e-16	1.64e-13	25.2646
SLC20A1	-4.59216	15.5412	-8.36135	6.82e-16	1.67e-13	25.2415
UBE2I	-5.55536	33.0754	-8.35504	7.14e-16	1.74e-13	25.1956
PPIAP22	-27.1946	125.283	-8.33765	8.12e-16	1.97e-13	25.0693
CAPZA1	-19.517	86.2366	-8.33206	8.46e-16	2.05e-13	25.0288
C1orf216	-3.72645	16.0388	-8.33114	8.52e-16	2.05e-13	25.0221
KANSL2	-4.33256	22.6437	-8.32646	8.82e-16	2.11e-13	24.9882
NIP7	-4.70406	19.3631	-8.32103	9.18e-16	2.18e-13	24.9488
DPH5	-5.57858	26.168	-8.32092	9.19e-16	2.18e-13	24.948
CALM3	-45.2989	263.228	-8.31924	9.3e-16	2.2e-13	24.9358
MIF4GD	-5.62209	26.6686	-8.30519	1.03e-15	2.43e-13	24.8341
UBE2D2	-10.5071	68.4677	-8.29901	1.08e-15	2.53e-13	24.7894
PRKACA	-7.26173	43.6206	-8.29743	1.09e-15	2.55e-13	24.7779
DNMT1	-3.87054	13.0439	-8.29439	1.12e-15	2.6e-13	24.756
PPP1CC	-13.814	64.7758	-8.29227	1.13e-15	2.63e-13	24.7407
GET3	-21.8854	121.08	-8.29055	1.15e-15	2.65e-13	24.7282
BOD1	-12.1753	64.1545	-8.28782	1.17e-15	2.69e-13	24.7085
RPF1	-10.5774	58.2485	-8.28428	1.2e-15	2.75e-13	24.683
ISCA1	-7.76088	37.7121	-8.27096	1.33e-15	3.02e-13	24.5868
TFDP1	-16.1003	59.7096	-8.26693	1.37e-15	3.1e-13	24.5577
NOA1	-10.3616	40.098	-8.26326	1.4e-15	3.17e-13	24.5312
GRSF1	-10.3402	49.9423	-8.24343	1.62e-15	3.65e-13	24.3884
KTI12	-2.20705	11.6986	-8.23414	1.74e-15	3.89e-13	24.3216
DCAF13	-4.16871	14.2663	-8.23327	1.75e-15	3.9e-13	24.3154
PSMA5	-8.50938	44.5278	-8.22794	1.82e-15	4.02e-13	24.2771
INTS13	-5.21486	19.3615	-8.22752	1.82e-15	4.02e-13	24.274
TAF9	-12.2089	48.5497	-8.2271	1.83e-15	4.02e-13	24.271
RBBP4	-12.9628	56.4266	-8.22693	1.83e-15	4.02e-13	24.2698
FBXO5	-1.64912	5.13784	-8.21723	1.97e-15	4.3e-13	24.2001
PPM1G	-15.4691	96.55	-8.21485	2e-15	4.35e-13	24.183
PRCC	-9.7344	54.7868	-8.19683	2.28e-15	4.93e-13	24.0538
DCBLD1	-1.34619	4.4538	-8.19671	2.28e-15	4.93e-13	24.053
COPS2	-6.74146	30.3356	-8.19461	2.32e-15	4.99e-13	24.0379
GART	-5.94584	22.231	-8.19137	2.37e-15	5.09e-13	24.0147
CARM1	-6.84011	29.748	-8.18932	2.41e-15	5.13e-13	24
AHSA1	-23.0211	127.078	-8.18851	2.42e-15	5.13e-13	23.9942
ATP5MC3	-12.4459	64.5028	-8.18794	2.43e-15	5.13e-13	23.9902
GLRX3	-4.17476	23.4675	-8.18701	2.45e-15	5.15e-13	23.9835
HNRNPU	-30.5329	156.891	-8.17875	2.6e-15	5.45e-13	23.9243
DHX9	-24.3002	98.1123	-8.17538	2.67e-15	5.56e-13	23.9003
BYSL	-7.16734	34.2802	-8.17421	2.69e-15	5.59e-13	23.8919
RUFY1	-4.94486	33.1259	-8.16494	2.88e-15	5.95e-13	23.8256
CSE1L	-17.1525	76.4988	-8.15639	3.06e-15	6.31e-13	23.7646
MORF4L2	-49.589	266.821	-8.15355	3.13e-15	6.42e-13	23.7443
GRK6	-5.41371	31.4073	-8.14786	3.26e-15	6.66e-13	23.7037
MAPKAP1	-6.65539	41.5978	-8.14494	3.33e-15	6.78e-13	23.6829
TRIM65	-4.07667	19.6797	-8.13952	3.46e-15	7.03e-13	23.6443
NHP2	-23.0447	114.62	-8.13309	3.63e-15	7.33e-13	23.5984
TAF12	-4.09931	22.723	-8.12995	3.71e-15	7.47e-13	23.5761
METAP2	-15.4308	62.1645	-8.12962	3.72e-15	7.47e-13	23.5737
RPP40	-2.49366	8.9656	-8.12238	3.92e-15	7.84e-13	23.5221
TMA16	-3.56137	15.6938	-8.11957	4e-15	7.96e-13	23.5021
MRPL30	-7.69663	37.2289	-8.11919	4.01e-15	7.96e-13	23.4995
AATF	-5.6484	35.7124	-8.1179	4.05e-15	8.01e-13	23.4903
CACYBP	-6.87534	32.0503	-8.10926	4.31e-15	8.5e-13	23.4289
MYBBP1A	-8.47855	37.1756	-8.10705	4.38e-15	8.6e-13	23.4132
ILF2	-44.4248	219.227	-8.1057	4.42e-15	8.65e-13	23.4035
HSPA9	-47.2528	205.243	-8.09908	4.64e-15	9.05e-13	23.3565
C1orf43	-62.2718	294.942	-8.09433	4.8e-15	9.33e-13	23.3228
TTL	-1.22716	4.82906	-8.09253	4.86e-15	9.42e-13	23.31
PSMD14	-4.06976	20.4233	-8.08667	5.08e-15	9.77e-13	23.2685
SDHA	-6.34306	37.5616	-8.08645	5.08e-15	9.77e-13	23.2669
DDX54	-10.0945	58.0251	-8.08591	5.1e-15	9.77e-13	23.2631
SPDL1	-1.44919	4.53401	-8.07715	5.44e-15	1.03e-12	23.201
SEPTIN9	-23.5569	68.767	-8.07665	5.46e-15	1.03e-12	23.1975
TIMM44	-3.91324	25.4647	-8.07658	5.46e-15	1.03e-12	23.1969
MAP4K4	-6.22792	22.1893	-8.07128	5.67e-15	1.07e-12	23.1594
PFKM	-8.20459	25.4639	-8.06948	5.74e-15	1.08e-12	23.1467
UBAP2L	-15.3759	61.5252	-8.06768	5.82e-15	1.09e-12	23.1339
CNBP	-107.278	689.945	-8.06447	5.96e-15	1.11e-12	23.1112
RARS1	-10.4471	55.7464	-8.06219	6.05e-15	1.13e-12	23.095
R3HDM1	-3.22785	11.9267	-8.06095	6.11e-15	1.13e-12	23.0863
EIF3M	-10.4294	61.9334	-8.05806	6.24e-15	1.15e-12	23.0658
RBM15B	-9.93521	47.0081	-8.05759	6.26e-15	1.15e-12	23.0625
DENR	-15.2251	74.6871	-8.03445	7.39e-15	1.36e-12	22.899
TFB2M	-8.70507	32.9557	-8.03258	7.49e-15	1.37e-12	22.8858
FAM220A	-5.09043	25.1389	-8.02783	7.75e-15	1.42e-12	22.8523
F2R	-15.9117	28.0896	-8.02248	8.06e-15	1.47e-12	22.8145
CCNI	-95.662	445.748	-8.02031	8.18e-15	1.48e-12	22.7993
WDR82	-16.062	70.2711	-8.01801	8.32e-15	1.5e-12	22.7831
MTCH2	-21.0762	95.4748	-8.01773	8.34e-15	1.5e-12	22.7811
SMARCD1	-6.07979	33.2052	-8.01548	8.47e-15	1.52e-12	22.7652
RIOK2	-2.43284	11.9456	-8.01274	8.64e-15	1.55e-12	22.7459
PSMA1	-9.07614	57.2484	-8.01192	8.69e-15	1.55e-12	22.7402
RALA	-7.60935	37.5444	-8.00646	9.04e-15	1.61e-12	22.7017
BAG6	-25.5109	156.214	-8.00512	9.12e-15	1.62e-12	22.6923
SEPTIN2	-35.9505	163.9	-7.98625	1.04e-14	1.84e-12	22.5596
MCMBP	-6.10712	27.4723	-7.98063	1.09e-14	1.91e-12	22.5202
YARS1	-6.39808	32.731	-7.97322	1.15e-14	2.01e-12	22.4681
EIF3J	-15.0664	68.4663	-7.97002	1.17e-14	2.04e-12	22.4456
RPE	-7.08609	30.2919	-7.96899	1.18e-14	2.05e-12	22.4385
BTF3	-128.09	548.989	-7.96856	1.19e-14	2.05e-12	22.4354
MYH9	-85.7981	318.168	-7.9644	1.22e-14	2.11e-12	22.4062
SRPK1	-5.28438	18.1779	-7.96369	1.23e-14	2.11e-12	22.4013
RFX5	-6.96447	29.1725	-7.96052	1.26e-14	2.15e-12	22.379
GYG1	-14.9149	61.9724	-7.95559	1.3e-14	2.22e-12	22.3445
DDX1	-15.4865	84.2512	-7.95156	1.34e-14	2.28e-12	22.3163
PCBP1	-61.5987	283.256	-7.94841	1.37e-14	2.33e-12	22.2942
PSMC6	-3.95421	24.1031	-7.94471	1.4e-14	2.38e-12	22.2683
CDYL	-3.23408	12.6213	-7.94327	1.42e-14	2.4e-12	22.2582
RBM3	-39.4865	154.893	-7.94299	1.42e-14	2.4e-12	22.2563
TMEM132A	-12.958	26.0025	-7.94157	1.44e-14	2.41e-12	22.2464
RPAP3	-3.41693	16.1396	-7.93795	1.47e-14	2.47e-12	22.2211
SNRNP40	-8.73917	35.0944	-7.9333	1.52e-14	2.54e-12	22.1885
USP39	-6.44503	39.8912	-7.92303	1.64e-14	2.73e-12	22.1168
MRPL45	-14.6352	75.9065	-7.92111	1.66e-14	2.76e-12	22.1034
DDOST	-75.5411	336.008	-7.91894	1.69e-14	2.79e-12	22.0883
ZNF207	-4.93982	25.3062	-7.9171	1.71e-14	2.82e-12	22.0754
ACTL6A	-9.15565	36.0052	-7.90954	1.8e-14	2.97e-12	22.0227
CAD	-4.69996	17.3166	-7.90471	1.87e-14	3.05e-12	21.989
ATIC	-11.8846	57.3076	-7.90396	1.88e-14	3.06e-12	21.9837
CHEK2	-1.15701	4.33777	-7.9031	1.89e-14	3.07e-12	21.9778
CSK	-9.14647	55.5985	-7.90223	1.9e-14	3.08e-12	21.9717
TSPAN3	-9.76266	53.8567	-7.90001	1.93e-14	3.12e-12	21.9563
CDK8	-2.96768	12.733	-7.89934	1.94e-14	3.12e-12	21.9516
ZNF146	-22.8523	80.7469	-7.89509	2e-14	3.21e-12	21.922
EIF3E	-49.0918	181.09	-7.89373	2.02e-14	3.23e-12	21.9125
EIF4A3	-9.83127	53.9197	-7.89103	2.06e-14	3.28e-12	21.8937
KDM1A	-13.3811	66.6452	-7.88953	2.08e-14	3.31e-12	21.8833
EEF2	-959.965	3715.56	-7.88677	2.12e-14	3.36e-12	21.864
TARDBP	-7.79702	60.0951	-7.87843	2.25e-14	3.56e-12	21.806
SAMM50	-5.12864	26.2841	-7.87566	2.29e-14	3.62e-12	21.7868
PARN	-6.33262	36.9935	-7.87277	2.34e-14	3.68e-12	21.7667
PPAT	-3.77942	10.2904	-7.86999	2.39e-14	3.74e-12	21.7474
AKIP1	-2.82174	16.6802	-7.86238	2.52e-14	3.94e-12	21.6945
PTGFRN	-11.6291	41.646	-7.8539	2.68e-14	4.17e-12	21.6357
MT-ND6	2378.12	5096.83	7.85224	2.71e-14	4.21e-12	21.6242
ATG3	-3.34663	18.1379	-7.85188	2.71e-14	4.21e-12	21.6217
PGD	-25.3168	105.226	-7.85088	2.73e-14	4.22e-12	21.6148
MFF	-4.03662	31.5576	-7.84929	2.76e-14	4.26e-12	21.6037
PXDN	-16.5936	38.7807	-7.84649	2.82e-14	4.33e-12	21.5843
RMND1	-3.79189	19.9163	-7.84046	2.94e-14	4.51e-12	21.5425
STRN4	-8.49483	47.617	-7.83742	3.01e-14	4.59e-12	21.5215
PCBP2	-18.7389	114.708	-7.83061	3.15e-14	4.8e-12	21.4743
QRSL1	-2.21245	9.48433	-7.83039	3.16e-14	4.8e-12	21.4728
MCU	-3.50105	12.6991	-7.82997	3.17e-14	4.8e-12	21.4699
CIAO1	-9.8656	52.4332	-7.82668	3.24e-14	4.9e-12	21.4471
ECT2	-4.92906	9.63502	-7.82571	3.27e-14	4.92e-12	21.4404
TCOF1	-2.70898	15.9003	-7.82443	3.29e-14	4.95e-12	21.4316
HADHA	-27.5027	197.723	-7.82058	3.39e-14	5.07e-12	21.405
IK	-11.284	84.9271	-7.81369	3.55e-14	5.31e-12	21.3573
DAP3	-13.3207	73.8918	-7.81179	3.6e-14	5.35e-12	21.3442
STOML2	-24.4456	155.338	-7.80936	3.66e-14	5.43e-12	21.3274
BLMH	-3.7256	17.8578	-7.80744	3.71e-14	5.49e-12	21.3142
GDI2	-39.2373	194.831	-7.80257	3.84e-14	5.67e-12	21.2806
DNAAF2	-3.90878	17.5207	-7.79967	3.92e-14	5.77e-12	21.2606
TAF11	-7.54105	52.0067	-7.79607	4.02e-14	5.9e-12	21.2357
DLAT	-7.07109	26.0123	-7.79551	4.04e-14	5.91e-12	21.2319
GEMIN2	-1.59937	7.81021	-7.7927	4.12e-14	6.01e-12	21.2125
UTP4	-3.8683	16.6531	-7.79099	4.17e-14	6.05e-12	21.2007
PABPC4	-17.6274	80.6595	-7.79094	4.17e-14	6.05e-12	21.2003
RBMX	-15.9245	86.0437	-7.78995	4.2e-14	6.08e-12	21.1935
RAE1	-2.5566	15.6384	-7.78795	4.26e-14	6.14e-12	21.1797
TMEM69	-8.43295	43.5653	-7.77883	4.54e-14	6.53e-12	21.117
KCTD5	-6.2541	28.7398	-7.77066	4.81e-14	6.9e-12	21.0607
MED28	-3.23862	16.004	-7.76473	5.01e-14	7.17e-12	21.0199
UBFD1	-7.04169	28.8475	-7.76396	5.04e-14	7.19e-12	21.0147
SNRPB2	-9.72206	49.3219	-7.76247	5.09e-14	7.25e-12	21.0044
TBRG4	-5.06309	29.132	-7.75292	5.44e-14	7.73e-12	20.9388
SNHG16	-4.01213	12.8527	-7.75195	5.48e-14	7.76e-12	20.9321
NOL10	-4.27868	28.2772	-7.74553	5.73e-14	8.1e-12	20.8881
LRPPRC	-14.492	49.8937	-7.74034	5.94e-14	8.38e-12	20.8524
NETO2	-3.17156	4.97446	-7.73923	5.99e-14	8.42e-12	20.8449
PSME3	-14.0944	58.2611	-7.73728	6.07e-14	8.51e-12	20.8314
PDHB	-7.56497	44.423	-7.73675	6.1e-14	8.52e-12	20.8279
NCAPD2	-6.52228	22.6145	-7.72872	6.45e-14	8.99e-12	20.7728
LPCAT1	-9.83355	32.9593	-7.726	6.57e-14	9.14e-12	20.7542
EEF1A1	-770.908	3195.17	-7.72503	6.62e-14	9.18e-12	20.7475
CBX3	-24.1132	86.5713	-7.72221	6.75e-14	9.32e-12	20.7282
PSMC1	-1.81888	8.00126	-7.72214	6.75e-14	9.32e-12	20.7277
CNOT10	-3.27367	19.5312	-7.71482	7.1e-14	9.77e-12	20.6776
NDUFB5	-5.95202	35.3882	-7.71462	7.11e-14	9.77e-12	20.6763
CAPRIN1	-28.9283	103.868	-7.71382	7.15e-14	9.8e-12	20.6708
AHCY	-45.9605	229.174	-7.71335	7.18e-14	9.8e-12	20.6676
TFE3	-7.43596	40.4317	-7.71308	7.19e-14	9.8e-12	20.6657
TSG101	-9.22443	62.1418	-7.71048	7.32e-14	9.96e-12	20.648
AMZ2	-6.20845	39.6482	-7.70281	7.72e-14	1.05e-11	20.5956
MT-ND5	1738.56	4252.25	7.69873	7.95e-14	1.08e-11	20.5677
AP3S1	-6.88584	38.0242	-7.68983	8.45e-14	1.14e-11	20.5069
LMNB1	-7.70236	13.4412	-7.68762	8.59e-14	1.16e-11	20.4918
ESRRA	-10.8147	48.5334	-7.68309	8.86e-14	1.19e-11	20.4609
NUDCD2	-1.90737	11.3707	-7.68293	8.87e-14	1.19e-11	20.4599
GAPDH	-347.005	1434.85	-7.6829	8.87e-14	1.19e-11	20.4596
SMARCE1	-4.74628	24.5225	-7.68217	8.92e-14	1.19e-11	20.4547
SEPTIN7	-7.52494	33.1579	-7.68184	8.94e-14	1.19e-11	20.4524
NLE1	-3.7416	16.8632	-7.67899	9.12e-14	1.21e-11	20.433
PPP6R1	-6.33222	32.7486	-7.67762	9.2e-14	1.22e-11	20.4237
UBTD2	-5.53185	26.1736	-7.67583	9.32e-14	1.23e-11	20.4115
CTSA	-12.6384	49.9244	-7.66988	9.71e-14	1.27e-11	20.3709
TIMM8A	-1.71253	8.25375	-7.66973	9.72e-14	1.27e-11	20.3699
SAMD1	-10.3571	43.303	-7.66564	1e-13	1.31e-11	20.3421
CLSTN3	-6.69844	18.602	-7.66255	1.02e-13	1.33e-11	20.321
EIF3I	-82.4237	494.755	-7.66196	1.03e-13	1.33e-11	20.317
RRP9	-12.4048	58.7987	-7.66176	1.03e-13	1.33e-11	20.3157
DNAJB6	-2.38804	13.0975	-7.6586	1.05e-13	1.36e-11	20.2942
MRPL9	-11.9126	74.6073	-7.65722	1.06e-13	1.37e-11	20.2848
BUB3	-5.70963	27.8259	-7.65555	1.07e-13	1.38e-11	20.2735
ACOT7	-3.62074	14.7894	-7.65541	1.07e-13	1.38e-11	20.2725
LDHAP4	-1.37609	3.00457	-7.65525	1.07e-13	1.38e-11	20.2714
HCCS	-4.39991	23.3184	-7.65454	1.08e-13	1.38e-11	20.2666
ARPC5	-5.96732	32.7271	-7.65427	1.08e-13	1.38e-11	20.2648
PSMG2	-6.06776	42.7856	-7.65117	1.11e-13	1.41e-11	20.2436
YWHAG	-44.3315	182.69	-7.64783	1.13e-13	1.44e-11	20.2209
ZC3H15	-12.6054	59.8527	-7.64148	1.18e-13	1.5e-11	20.1778
POGLUT1	-1.74387	7.18747	-7.64112	1.19e-13	1.5e-11	20.1754
OAZ2	-5.17548	36.1018	-7.63967	1.2e-13	1.51e-11	20.1656
EIF3H	-28.8792	125.061	-7.63355	1.25e-13	1.57e-11	20.124
GATAD2A	-5.27301	27.5749	-7.62582	1.32e-13	1.66e-11	20.0716
MKRN2	-6.3558	33.0366	-7.6166	1.4e-13	1.76e-11	20.0091
EPRS1	-21.1181	74.583	-7.6117	1.45e-13	1.82e-11	19.9759
EIF4B	-59.3225	256.68	-7.60758	1.49e-13	1.86e-11	19.948
POLR1B	-4.06311	13.1013	-7.60687	1.5e-13	1.87e-11	19.9432
PRKAG1	-7.28399	45.5044	-7.6062	1.51e-13	1.87e-11	19.9387
ATXN2L	-11.9595	51.3137	-7.60558	1.52e-13	1.88e-11	19.9345
FXR1	-5.61898	31.8552	-7.60228	1.55e-13	1.91e-11	19.9122
EIF3D	-35.9404	207.972	-7.60224	1.55e-13	1.91e-11	19.9119
PCNA	-27.0538	102.428	-7.60115	1.56e-13	1.92e-11	19.9045
ICMT	-11.7881	68.34	-7.59932	1.58e-13	1.94e-11	19.8922
SNX12	-11.5119	76.1605	-7.59349	1.65e-13	2.02e-11	19.8528
CMPK1	-68.8113	262.783	-7.5932	1.65e-13	2.02e-11	19.8508
HNRNPD	-13.0959	87.8512	-7.59286	1.65e-13	2.02e-11	19.8485
DNTTIP2	-3.70486	22.2121	-7.59232	1.66e-13	2.02e-11	19.8448
NDC1	-4.52247	15.382	-7.5916	1.67e-13	2.03e-11	19.84
RPL26L1	-7.17553	40.1833	-7.59109	1.67e-13	2.03e-11	19.8366
TMEM43	-15.6552	71.9947	-7.58929	1.7e-13	2.05e-11	19.8244
UBE2R2	-13.5756	84.6194	-7.58721	1.72e-13	2.07e-11	19.8103
UBE2D3	-11.8233	72.3323	-7.58586	1.74e-13	2.09e-11	19.8012
EARS2	-5.15191	21.8495	-7.58418	1.76e-13	2.11e-11	19.7899
TCP1	-26.6433	131.099	-7.58378	1.76e-13	2.11e-11	19.7872
FIP1L1	-2.86544	14.1699	-7.57812	1.83e-13	2.19e-11	19.749
NSUN2	-8.3188	41.3474	-7.57647	1.85e-13	2.21e-11	19.7379
NUP210	-13.0415	34.1616	-7.57581	1.86e-13	2.21e-11	19.7335
PSMC4	-18.7529	116.783	-7.57354	1.89e-13	2.24e-11	19.7181
WSB2	-21.9277	73.3386	-7.57165	1.91e-13	2.27e-11	19.7054
SNX5	-4.94241	27.0781	-7.5707	1.93e-13	2.28e-11	19.699
EIF2A	-19.9627	89.2551	-7.5651	2e-13	2.36e-11	19.6612
MRS2	-3.62606	20.2458	-7.56473	2.01e-13	2.36e-11	19.6587
ETFA	-12.2705	52.2826	-7.56432	2.01e-13	2.37e-11	19.656
PKM	-51.8436	241.854	-7.56376	2.02e-13	2.37e-11	19.6522
NOB1	-17.3185	72.052	-7.56147	2.05e-13	2.4e-11	19.6368
TOMM40	-8.74361	49.243	-7.55533	2.14e-13	2.5e-11	19.5954
AFG3L2	-6.60436	29.852	-7.55518	2.14e-13	2.5e-11	19.5945
OSTC	-29.0746	155.499	-7.55184	2.19e-13	2.55e-11	19.5719
ATP5F1B	-168.364	858.769	-7.55155	2.2e-13	2.55e-11	19.57
FAM98A	-6.00193	31.0846	-7.55054	2.21e-13	2.56e-11	19.5632
TPST1	-4.86835	16.0524	-7.54761	2.26e-13	2.61e-11	19.5435
ACTG1	-570.05	2950.2	-7.54729	2.26e-13	2.61e-11	19.5414
FLAD1	-4.93679	26.6192	-7.54623	2.28e-13	2.62e-11	19.5343
AGRN	-20.6563	59.4082	-7.54543	2.29e-13	2.63e-11	19.5288
MRPL1	-4.98388	28.592	-7.54372	2.32e-13	2.66e-11	19.5173
WASF1	-3.6498	10.1913	-7.53658	2.44e-13	2.78e-11	19.4694
MYD88	-8.75686	36.2477	-7.53656	2.44e-13	2.78e-11	19.4693
ABHD5	-3.25148	11.7664	-7.53438	2.47e-13	2.81e-11	19.4546
GNAI3	-1.85871	10.3003	-7.53213	2.51e-13	2.85e-11	19.4395
RCC1	-10.4108	31.885	-7.53125	2.53e-13	2.85e-11	19.4336
UBLCP1	-5.78245	28.6677	-7.53122	2.53e-13	2.85e-11	19.4334
GMEB1	-1.60073	9.10126	-7.53106	2.53e-13	2.85e-11	19.4324
PUS7	-4.22486	12.5957	-7.52608	2.62e-13	2.94e-11	19.3989
WDR43	-8.7827	33.4404	-7.52538	2.63e-13	2.94e-11	19.3942
AIMP1	-7.87195	50.2488	-7.52525	2.63e-13	2.94e-11	19.3933
MRPS10	-7.40655	49.316	-7.52524	2.63e-13	2.94e-11	19.3933
DNAJC8	-10.8708	93.3364	-7.51793	2.77e-13	3.08e-11	19.3442
CNIH1	-9.62714	48.0109	-7.51738	2.78e-13	3.09e-11	19.3406
PSMD12	-5.47251	30.5429	-7.50918	2.94e-13	3.25e-11	19.2856
BECN1	-6.89111	29.0447	-7.50886	2.94e-13	3.25e-11	19.2834
NKAPD1	-3.62041	18.6707	-7.50701	2.98e-13	3.29e-11	19.2711
UIMC1	-2.37294	13.7898	-7.50532	3.02e-13	3.32e-11	19.2598
DIAPH1	-13.716	49.4987	-7.50111	3.1e-13	3.41e-11	19.2316
DRG1	-10.7472	78.6072	-7.4983	3.16e-13	3.46e-11	19.2128
PRMT1	-13.2613	78.4065	-7.49823	3.17e-13	3.46e-11	19.2123
TFAP4	-1.73373	6.75986	-7.49757	3.18e-13	3.47e-11	19.2079
BTBD10	-4.20379	21.9868	-7.49672	3.2e-13	3.49e-11	19.2022
PKNOX1	-1.48332	9.32318	-7.49506	3.23e-13	3.52e-11	19.1911
ELK3	-7.08061	21.5411	-7.49338	3.27e-13	3.55e-11	19.1799
LARP1	-20.0302	82.9123	-7.49026	3.34e-13	3.62e-11	19.159
CDV3	-17.2217	75.2034	-7.48776	3.4e-13	3.67e-11	19.1423
TOP1	-27.229	100.997	-7.48765	3.4e-13	3.67e-11	19.1416
FARSA	-17.7211	108.2	-7.48604	3.44e-13	3.7e-11	19.1309
ATPAF1	-6.87055	40.1956	-7.4858	3.45e-13	3.7e-11	19.1292
VTA1	-3.4926	16.7242	-7.48559	3.45e-13	3.7e-11	19.1278
AL031985.3	-1.30046	4.26085	-7.48489	3.47e-13	3.71e-11	19.1232
QSOX2	-5.03627	19.6232	-7.48479	3.47e-13	3.71e-11	19.1225
FAM118B	-2.69325	11.2129	-7.478	3.63e-13	3.88e-11	19.0771
TOMM22	-15.0771	103.762	-7.47638	3.67e-13	3.91e-11	19.0663
MORF4L1P1	-4.89413	18.9427	-7.47537	3.7e-13	3.93e-11	19.0596
LSM14B	-10.0137	50.7952	-7.47484	3.71e-13	3.94e-11	19.0561
GMPS	-6.21001	25.3384	-7.47119	3.81e-13	4.03e-11	19.0317
AKIRIN2	-7.05823	35.7127	-7.4652	3.96e-13	4.18e-11	18.9917
RRM1	-10.4215	45.5104	-7.46448	3.98e-13	4.19e-11	18.9869
GRPEL2	-3.02291	13.2731	-7.46425	3.99e-13	4.19e-11	18.9854
FXYD3	131.893	358.885	7.46357	4.01e-13	4.19e-11	18.9809
SH3GL1	-12.4385	83.5921	-7.46353	4.01e-13	4.19e-11	18.9806
CAP1	-31.1056	179.041	-7.46284	4.03e-13	4.21e-11	18.976
XRN2	-20.1025	80.4413	-7.45997	4.11e-13	4.28e-11	18.9569
TUBA1C	-10.4519	29.3192	-7.45619	4.21e-13	4.38e-11	18.9317
GTF2E1	-2.63471	11.1189	-7.45119	4.36e-13	4.53e-11	18.8984
EIF4G3	-8.08984	29.5428	-7.44939	4.41e-13	4.56e-11	18.8864
MED8	-6.48709	46.6897	-7.44936	4.41e-13	4.56e-11	18.8862
CASP3	-5.75606	25.5644	-7.44932	4.42e-13	4.56e-11	18.886
NCBP2	-9.6315	55.695	-7.43706	4.8e-13	4.94e-11	18.8045
PANK4	-2.34296	14.1218	-7.43425	4.89e-13	5.03e-11	18.7858
MLX	-8.53327	39.4872	-7.42949	5.05e-13	5.18e-11	18.7541
ZNF330	-5.77549	37.1486	-7.42909	5.07e-13	5.18e-11	18.7514
METTL2A	-2.26306	13.0327	-7.42697	5.14e-13	5.24e-11	18.7374
ACP1	-10.0445	64.2336	-7.42658	5.15e-13	5.25e-11	18.7348
PTPN12	-6.97997	25.7689	-7.42413	5.24e-13	5.33e-11	18.7185
NUDCD1	-3.23584	11.7262	-7.41988	5.39e-13	5.47e-11	18.6904
HPRT1	-11.1991	50.331	-7.41929	5.41e-13	5.48e-11	18.6864
PWP1	-7.34961	47.8656	-7.41868	5.44e-13	5.5e-11	18.6824
EIF2S2	-15.9915	95.1828	-7.41732	5.49e-13	5.54e-11	18.6733
GPATCH4	-5.69786	26.9705	-7.41641	5.52e-13	5.56e-11	18.6674
HNRNPF	-61.3834	285.738	-7.41628	5.52e-13	5.56e-11	18.6665
COPS3	-8.72336	55.433	-7.4152	5.57e-13	5.59e-11	18.6593
GPN1	-4.45037	27.6237	-7.41174	5.7e-13	5.71e-11	18.6364
RBM4	-2.6354	12.7045	-7.40777	5.85e-13	5.85e-11	18.6101
RAB3IL1	-2.3707	7.60143	-7.40508	5.96e-13	5.95e-11	18.5922
RPL22	-45.566	246.903	-7.40351	6.02e-13	6e-11	18.5819
LRRC8D	-4.08131	15.0152	-7.40178	6.09e-13	6.06e-11	18.5703
NEPRO	-3.50713	18.3273	-7.39798	6.25e-13	6.21e-11	18.5452
TRIM28	-32.1761	236.862	-7.39651	6.32e-13	6.26e-11	18.5355
ENG	-25.9146	77.1196	-7.3944	6.41e-13	6.34e-11	18.5215
EEF1B2	-98.5611	404.216	-7.39208	6.51e-13	6.42e-11	18.5062
CYC1	-48.8002	205.549	-7.3886	6.66e-13	6.56e-11	18.4832
TXNRD1	-14.1399	39.149	-7.38321	6.91e-13	6.8e-11	18.4475
LAMB1	-12.391	25.9171	-7.37998	7.06e-13	6.93e-11	18.4262
SUMO2	-19.1338	127.804	-7.37691	7.21e-13	7.06e-11	18.4059
HNRNPR	-11.8108	54.7795	-7.37499	7.3e-13	7.13e-11	18.3932
NAA50	-14.8787	60.1293	-7.3737	7.37e-13	7.18e-11	18.3847
TAF4	-1.47711	6.24654	-7.37286	7.41e-13	7.21e-11	18.3792
TRMT10C	-7.31805	37.5307	-7.37248	7.43e-13	7.21e-11	18.3767
PSPC1	-6.78579	37.6514	-7.36945	7.58e-13	7.35e-11	18.3567
FANCF	-4.64442	19.3274	-7.36763	7.67e-13	7.4e-11	18.3447
COMMD8	-4.44702	18.9956	-7.3671	7.7e-13	7.41e-11	18.3412
C1orf131	-1.4297	6.53199	-7.35746	8.22e-13	7.9e-11	18.2776
YRDC	-8.48801	38.5351	-7.35694	8.25e-13	7.91e-11	18.2742
DCAF4	-1.33298	7.17538	-7.3533	8.45e-13	8.09e-11	18.2502
MEX3A	-7.32421	10.3732	-7.35312	8.46e-13	8.09e-11	18.249
PTPN2	-1.952	11.7796	-7.3526	8.49e-13	8.1e-11	18.2456
BRIX1	-3.44466	16.9017	-7.3446	8.96e-13	8.53e-11	18.1929
PORCN	-1.90049	10.1985	-7.3439	9e-13	8.56e-11	18.1883
PLAA	-5.19361	23.5618	-7.33989	9.25e-13	8.78e-11	18.1619
DAXX	-5.79579	49.438	-7.33947	9.27e-13	8.79e-11	18.1591
UCK2	-6.23018	19.504	-7.3388	9.31e-13	8.81e-11	18.1548
EXT2	-12.3685	58.7202	-7.33747	9.4e-13	8.88e-11	18.146
RRP1B	-4.81314	22.8457	-7.33678	9.44e-13	8.9e-11	18.1415
MAN2B1	-13.4475	55.8518	-7.336	9.49e-13	8.93e-11	18.1363
RAD23B	-35.7214	162.848	-7.3355	9.52e-13	8.95e-11	18.1331
ELMO1	-1.38822	3.61502	-7.33523	9.54e-13	8.95e-11	18.1313
CDK11B	-3.16355	23.9955	-7.33016	9.87e-13	9.23e-11	18.0979
NKRF	-1.80027	9.9678	-7.32275	1.04e-12	9.68e-11	18.0493
NACC1	-10.3701	53.347	-7.32144	1.05e-12	9.74e-11	18.0407
UBE2V1	-1.19992	4.97203	-7.32123	1.05e-12	9.74e-11	18.0393
PNPO	-9.80228	34.852	-7.32011	1.06e-12	9.8e-11	18.032
LYSMD2	-3.43331	16.7546	-7.31994	1.06e-12	9.8e-11	18.0308
EXOSC10	-5.13579	29.2665	-7.3186	1.07e-12	9.87e-11	18.0221
CCDC59	-2.37235	14.8822	-7.31214	1.11e-12	1.03e-10	17.9797
ZFP91	-10.7586	43.0699	-7.30975	1.13e-12	1.04e-10	17.964
GTPBP3	-2.66332	13.4986	-7.30903	1.14e-12	1.05e-10	17.9593
CTSL	-27.7619	126.892	-7.30842	1.14e-12	1.05e-10	17.9553
DHFR	-2.96523	7.40036	-7.30659	1.16e-12	1.06e-10	17.9433
PPP4R1	-5.3434	23.6184	-7.30527	1.17e-12	1.07e-10	17.9346
CDC42	-28.7365	164.51	-7.30513	1.17e-12	1.07e-10	17.9337
ZNF174	-2.62339	15.8982	-7.30369	1.18e-12	1.08e-10	17.9243
DDX27	-4.98232	35.2725	-7.30275	1.19e-12	1.08e-10	17.9181
DDX50	-7.86146	48.0949	-7.30203	1.19e-12	1.08e-10	17.9134
ST13	-41.1905	239.314	-7.30196	1.19e-12	1.08e-10	17.9129
RNASEH1	-3.31872	12.7158	-7.2982	1.22e-12	1.1e-10	17.8883
AC099850.4	-2.23799	3.10784	-7.29597	1.24e-12	1.12e-10	17.8737
DR1	-3.8191	17.3317	-7.29458	1.25e-12	1.13e-10	17.8646
IL15RA	-1.54968	5.4448	-7.28595	1.33e-12	1.19e-10	17.8081
CDCA4	-2.89455	10.8054	-7.27762	1.4e-12	1.26e-10	17.7537
MPZL1	-13.1097	65.5046	-7.27724	1.41e-12	1.26e-10	17.7513
HSF2	-3.41129	16.4619	-7.2765	1.41e-12	1.26e-10	17.7464
DLD	-9.92459	47.4189	-7.27311	1.45e-12	1.29e-10	17.7243
NME7	-1.19379	5.7164	-7.26784	1.5e-12	1.33e-10	17.6899
NAA15	-3.68042	14.1149	-7.26663	1.51e-12	1.34e-10	17.6819
PDCD6	-5.37077	31.7701	-7.26141	1.56e-12	1.39e-10	17.6479
ATXN10	-15.2551	86.0656	-7.25924	1.59e-12	1.4e-10	17.6338
CDK16	-6.29182	42.6409	-7.25428	1.64e-12	1.45e-10	17.6014
DIMT1	-5.14158	25.6826	-7.25277	1.66e-12	1.46e-10	17.5916
GTF3C2	-5.55208	29.1064	-7.25199	1.66e-12	1.47e-10	17.5865
PREP	-10.4466	38.8012	-7.24999	1.69e-12	1.48e-10	17.5735
RNF44	-7.45045	31.4322	-7.24957	1.69e-12	1.49e-10	17.5708
TIMELESS	-3.66793	12.7664	-7.24652	1.73e-12	1.51e-10	17.5509
RRM2	-4.86076	6.41091	-7.24617	1.73e-12	1.52e-10	17.5486
G3BP1	-9.15962	40.7666	-7.24528	1.74e-12	1.52e-10	17.5428
ILF3	-13.0205	81.5297	-7.24449	1.75e-12	1.53e-10	17.5377
TTYH3	-15.9224	52.5179	-7.24244	1.77e-12	1.55e-10	17.5243
DPF2	-3.32007	21.8783	-7.24055	1.8e-12	1.56e-10	17.512
ATP6AP2	-31.1113	159.378	-7.23802	1.83e-12	1.59e-10	17.4955
STMN1	-11.5274	28.3965	-7.23481	1.87e-12	1.62e-10	17.4747
KIF4A	-2.56978	3.41827	-7.23216	1.9e-12	1.64e-10	17.4575
EIF3L	-43.7688	170.914	-7.23195	1.9e-12	1.64e-10	17.4561
NRBP1	-8.25942	58.3269	-7.23153	1.91e-12	1.65e-10	17.4534
PPP5C	-4.18827	27.4159	-7.22599	1.98e-12	1.7e-10	17.4174
SARS1	-15.8083	116.063	-7.22513	1.99e-12	1.71e-10	17.4118
OIP5	-1.1753	2.09073	-7.22408	2e-12	1.72e-10	17.405
TIMM17A	-7.72973	40.0124	-7.2229	2.02e-12	1.73e-10	17.3973
MARS2	-3.06341	8.80339	-7.22231	2.03e-12	1.74e-10	17.3935
UMPS	-2.52144	13.3036	-7.22075	2.05e-12	1.75e-10	17.3833
WRNIP1	-8.85281	53.5629	-7.22048	2.05e-12	1.75e-10	17.3816
AIFM1	-11.2139	56.7129	-7.21197	2.17e-12	1.85e-10	17.3264
TWNK	-4.40536	16.8198	-7.20995	2.2e-12	1.87e-10	17.3132
PTGES3	-41.7732	257.578	-7.20892	2.21e-12	1.88e-10	17.3066
GNPDA1	-7.8163	38.2218	-7.20802	2.23e-12	1.89e-10	17.3008
RAP2A	-4.04572	14.6777	-7.20777	2.23e-12	1.89e-10	17.2991
PSMA3	-11.3891	68.0241	-7.20542	2.27e-12	1.92e-10	17.2839
SLC5A6	-4.25369	18.1691	-7.20234	2.31e-12	1.95e-10	17.264
PARS2	-1.93565	9.74041	-7.19933	2.36e-12	1.99e-10	17.2444
MAPRE1	-22.795	130.639	-7.19925	2.36e-12	1.99e-10	17.2439
TMEM106C	-20.3428	71.3179	-7.19808	2.38e-12	2e-10	17.2364
LLGL1	-3.85402	15.1125	-7.19653	2.4e-12	2.02e-10	17.2263
LAPTM4A	-69.8571	467.16	-7.19494	2.43e-12	2.03e-10	17.216
URB2	-1.94563	6.27642	-7.19314	2.46e-12	2.05e-10	17.2044
CCDC43	-5.23939	26.7668	-7.18963	2.52e-12	2.1e-10	17.1816
ZNF664	-27.8076	109.262	-7.18807	2.54e-12	2.12e-10	17.1716
GPC4	-8.40265	19.0453	-7.18373	2.62e-12	2.18e-10	17.1435
ACTR2	-36.4877	146.804	-7.17914	2.7e-12	2.24e-10	17.1138
LRRC41	-8.73126	49.5983	-7.17837	2.71e-12	2.24e-10	17.1089
PRMT3	-2.02723	8.29458	-7.17697	2.74e-12	2.26e-10	17.0998
EIF4H	-37.8967	230.651	-7.17665	2.74e-12	2.26e-10	17.0978
MSH2	-5.18466	18.3533	-7.1744	2.78e-12	2.29e-10	17.0832
UNG	-9.88695	45.6439	-7.17374	2.79e-12	2.3e-10	17.0789
TDG	-3.31243	11.7477	-7.17332	2.8e-12	2.3e-10	17.0762
RPIA	-6.16311	33.9145	-7.16684	2.92e-12	2.4e-10	17.0344
NUP62	-5.56129	33.9424	-7.16617	2.94e-12	2.4e-10	17.0301
CACNG4	22.6029	32.5104	7.16597	2.94e-12	2.4e-10	17.0288
MAEA	-3.75937	23.0917	-7.16516	2.96e-12	2.41e-10	17.0235
WDR1	-18.4792	104.991	-7.16505	2.96e-12	2.41e-10	17.0229
SMARCA5	-10.4885	39.7944	-7.16396	2.98e-12	2.42e-10	17.0159
LINC00665	-5.16764	19.3018	-7.16368	2.99e-12	2.42e-10	17.014
PSMD1	-10.1985	56.7411	-7.15974	3.06e-12	2.48e-10	16.9886
MCM2	-6.21957	19.4477	-7.1588	3.08e-12	2.49e-10	16.9826
DCTN2	-10.274	84.6367	-7.15877	3.08e-12	2.49e-10	16.9823
DFFA	-4.5311	26.1112	-7.15856	3.09e-12	2.49e-10	16.981
ZNF131	-2.32015	10.2704	-7.15639	3.13e-12	2.52e-10	16.967
NOL8	-2.55454	12.5974	-7.15446	3.17e-12	2.55e-10	16.9546
THG1L	-2.68578	14.4205	-7.15439	3.17e-12	2.55e-10	16.9541
RRAGC	-2.23798	13.5618	-7.15146	3.24e-12	2.59e-10	16.9352
CYCS	-16.9341	67.4023	-7.15143	3.24e-12	2.59e-10	16.9351
PDE6D	-2.46194	16.3978	-7.14834	3.3e-12	2.64e-10	16.9152
PPP3R1	-7.72814	48.491	-7.14536	3.37e-12	2.69e-10	16.8959
HMMR	-2.3502	3.47247	-7.14526	3.37e-12	2.69e-10	16.8953
DHX15	-11.1981	46.5019	-7.14467	3.38e-12	2.7e-10	16.8915
ACTN4	-39.9869	187.919	-7.14422	3.39e-12	2.7e-10	16.8886
MRM2	-4.73297	32.5325	-7.1433	3.42e-12	2.71e-10	16.8827
SPARC	-142.344	321.226	-7.14322	3.42e-12	2.71e-10	16.8822
PIGW	-3.66441	11.9284	-7.14287	3.42e-12	2.71e-10	16.8799
SLC15A4	-2.08819	12.6058	-7.14008	3.49e-12	2.76e-10	16.862
MSANTD3	-2.42729	14.7777	-7.13891	3.52e-12	2.78e-10	16.8544
FTH1	-89.2187	445.669	-7.13666	3.57e-12	2.81e-10	16.84
IL13RA1	-15.3481	62.5794	-7.13408	3.63e-12	2.86e-10	16.8234
COMMD2	-3.45223	15.638	-7.1318	3.68e-12	2.9e-10	16.8087
FAM216A	-2.02185	6.28684	-7.13049	3.71e-12	2.92e-10	16.8003
NCK2	-8.79534	47.9952	-7.1293	3.74e-12	2.93e-10	16.7927
AXIN1	-3.39706	19.455	-7.12866	3.76e-12	2.94e-10	16.7886
DNAJC11	-3.91566	17.0516	-7.12856	3.76e-12	2.94e-10	16.7879
SMNDC1	-2.92644	15.1775	-7.1282	3.77e-12	2.94e-10	16.7856
ZBTB12	-3.76589	13.5449	-7.12493	3.85e-12	3e-10	16.7646
C11orf58	-9.18665	50.9862	-7.12354	3.89e-12	3.03e-10	16.7557
SF3B3	-8.48026	34.1174	-7.12324	3.9e-12	3.03e-10	16.7537
TPGS2	-2.301	12.4706	-7.11884	4.01e-12	3.11e-10	16.7255
MIR621	-16.1207	41.706	-7.11579	4.09e-12	3.17e-10	16.7059
NDUFS2	-12.9194	80.677	-7.11082	4.23e-12	3.27e-10	16.674
FASTKD1	-2.08741	8.28775	-7.10961	4.26e-12	3.29e-10	16.6663
HIRA	-2.39005	13.4986	-7.10823	4.3e-12	3.31e-10	16.6575
POLR3C	-3.2532	20.8502	-7.10636	4.35e-12	3.35e-10	16.6455
SLC44A1	-5.70418	20.0824	-7.10303	4.45e-12	3.42e-10	16.6241
TOMM5	-2.48051	15.1286	-7.10099	4.51e-12	3.46e-10	16.611
ANAPC7	-3.33233	25.2173	-7.0985	4.58e-12	3.51e-10	16.5951
PALB2	-1.50108	6.27273	-7.09488	4.69e-12	3.58e-10	16.5719
RFC2	-7.03394	33.019	-7.09485	4.69e-12	3.58e-10	16.5717
PDGFRB	-14.9181	36.6785	-7.09433	4.71e-12	3.59e-10	16.5684
PRCP	-4.57525	25.7571	-7.09397	4.72e-12	3.6e-10	16.5661
FAM98B	-4.18788	20.2636	-7.09121	4.81e-12	3.65e-10	16.5484
OXNAD1	-1.07592	5.54878	-7.09106	4.81e-12	3.65e-10	16.5475
SLC25A6	-387.778	1427.1	-7.08825	4.9e-12	3.71e-10	16.5295
WDR75	-3.81865	22.1359	-7.08641	4.96e-12	3.75e-10	16.5177
SSBP1	-5.89011	34.2749	-7.08627	4.96e-12	3.75e-10	16.5168
ITGB1BP1	-2.48108	14.8226	-7.08551	4.99e-12	3.76e-10	16.512
UTP23	-3.41313	12.0443	-7.08503	5e-12	3.77e-10	16.5089
PTMAP9	-1.1019	3.55297	-7.08348	5.05e-12	3.8e-10	16.499
XPO5	-4.20918	19.6414	-7.08252	5.09e-12	3.82e-10	16.4929
PICALM	-19.8005	91.0675	-7.07555	5.32e-12	3.99e-10	16.4483
TRIAP1	-9.52793	57.5023	-7.07329	5.4e-12	4.04e-10	16.4339
ZNF343	-1.37477	8.17204	-7.06721	5.62e-12	4.2e-10	16.3951
METTL8	-1.64866	6.54399	-7.0667	5.64e-12	4.21e-10	16.3919
H3P6	-7.39175	22.1103	-7.06639	5.65e-12	4.21e-10	16.3899
CWC27	-3.09109	18.06	-7.06603	5.66e-12	4.22e-10	16.3876
TUFM	-41.7699	313.716	-7.06267	5.79e-12	4.3e-10	16.3662
PLRG1	-4.00589	27.1138	-7.0603	5.88e-12	4.36e-10	16.351
PAIP1	-9.99455	50.953	-7.0602	5.88e-12	4.36e-10	16.3504
NFYB	-4.49407	26.1168	-7.05809	5.96e-12	4.41e-10	16.337
CFL1	-52.9179	373.62	-7.05807	5.97e-12	4.41e-10	16.3368
KIF23	-1.09072	1.77534	-7.05731	6e-12	4.43e-10	16.332
CTNNA1	-25.1011	134.861	-7.05418	6.12e-12	4.51e-10	16.312
MYO19	-1.51993	6.14209	-7.05218	6.2e-12	4.56e-10	16.2993
UBE2K	-11.3255	55.395	-7.05211	6.2e-12	4.56e-10	16.2989
TRIP13	-1.95486	3.79136	-7.0509	6.25e-12	4.59e-10	16.2911
MEX3B	-1.47131	3.31666	-7.0502	6.28e-12	4.6e-10	16.2867
CEP85	-1.64803	5.28764	-7.0501	6.28e-12	4.6e-10	16.286
YWHAZ	-61.244	231.429	-7.04998	6.29e-12	4.6e-10	16.2853
ZKSCAN4	-1.43951	6.39336	-7.04604	6.45e-12	4.71e-10	16.2602
FXN	-1.64524	11.5558	-7.04562	6.47e-12	4.72e-10	16.2575
KPNA3	-5.16207	19.2248	-7.04366	6.55e-12	4.77e-10	16.245
WRAP73	-1.2058	8.01661	-7.04152	6.64e-12	4.83e-10	16.2314
BUB1B	-1.67933	3.00265	-7.03945	6.73e-12	4.89e-10	16.2182
MDH2	-42.0794	233.984	-7.0389	6.76e-12	4.9e-10	16.2148
ABT1	-4.87583	30.7021	-7.03507	6.93e-12	5.01e-10	16.1904
AMPD2	-3.8618	20.9294	-7.03366	6.99e-12	5.05e-10	16.1814
SEC14L1	-6.28079	20.5136	-7.0315	7.09e-12	5.11e-10	16.1677
EPS15L1	-1.89882	13.7947	-7.03137	7.1e-12	5.11e-10	16.1669
LSM12	-2.12494	9.08075	-7.02822	7.24e-12	5.21e-10	16.1468
CHRM1	32.5761	89.1737	7.02798	7.26e-12	5.21e-10	16.1453
NARS2	-6.40207	28.5448	-7.027	7.3e-12	5.24e-10	16.1392
APOBEC3B	-1.25785	2.37919	-7.02579	7.36e-12	5.27e-10	16.1314
MAP4	-11.5287	56.2283	-7.02489	7.4e-12	5.3e-10	16.1257
TGFBI	-8.72609	22.6215	-7.02463	7.42e-12	5.3e-10	16.1241
GANAB	-77.3768	343.177	-7.02353	7.47e-12	5.33e-10	16.1171
UBE2E1	-14.0742	82.1003	-7.02118	7.58e-12	5.41e-10	16.1022
ZNF480	-2.78147	13.6428	-7.02066	7.61e-12	5.42e-10	16.0989
ZBED4	-3.44343	12.8803	-7.01963	7.66e-12	5.45e-10	16.0923
PSMB2	-7.04163	60.8885	-7.0175	7.77e-12	5.52e-10	16.0788
RIMKLA	-1.48643	4.26429	-7.01543	7.87e-12	5.58e-10	16.0657
COL8A1	-9.07403	15.2704	-7.01404	7.94e-12	5.62e-10	16.0569
TTC13	-1.84311	7.74028	-7.01373	7.96e-12	5.62e-10	16.0549
CNOT8	-9.21091	44.0187	-7.00855	8.23e-12	5.81e-10	16.0221
THAP1	-2.43406	11.4912	-7.00808	8.26e-12	5.82e-10	16.0191
RNF4	-5.7963	29.0035	-7.00614	8.36e-12	5.88e-10	16.0068
PPP2R5E	-3.17219	14.573	-7.00614	8.36e-12	5.88e-10	16.0068
TRIT1	-5.95025	32.464	-7.003	8.53e-12	5.99e-10	15.9869
NUSAP1	-6.36987	9.69339	-7.00132	8.63e-12	6.05e-10	15.9763
RIOX2	-3.57849	14.8743	-6.99969	8.72e-12	6.09e-10	15.9659
SNX6	-8.32462	35.5936	-6.99968	8.72e-12	6.09e-10	15.9659
SRP68	-5.8584	41.2976	-6.99701	8.87e-12	6.19e-10	15.949
RAD54L	-1.08003	1.50799	-6.99263	9.12e-12	6.35e-10	15.9213
SOCS5	-3.90862	15.9503	-6.99248	9.13e-12	6.35e-10	15.9204
POLG	-4.66423	23.1053	-6.99185	9.17e-12	6.37e-10	15.9164
XXYLT1	-2.00311	8.97811	-6.99112	9.21e-12	6.38e-10	15.9117
FAM210A	-1.76618	8.25331	-6.99085	9.23e-12	6.39e-10	15.91
BTBD1	-10.8809	50.6374	-6.99062	9.24e-12	6.39e-10	15.9086
PLCG1	-5.63702	24.1676	-6.99031	9.26e-12	6.39e-10	15.9066
CEP57	-4.111	16.7404	-6.98918	9.33e-12	6.43e-10	15.8995
RPL15	-81.5131	511.631	-6.98909	9.34e-12	6.43e-10	15.8989
DLGAP5	-1.82257	2.40673	-6.98882	9.35e-12	6.43e-10	15.8972
GCH1	-3.71596	12.0443	-6.98875	9.36e-12	6.43e-10	15.8967
DNAJC9	-2.46529	11.0702	-6.98837	9.38e-12	6.43e-10	15.8943
SAMHD1	-11.8466	32.4265	-6.98807	9.4e-12	6.44e-10	15.8924
DNAJC21	-4.37118	20.8073	-6.98406	9.64e-12	6.6e-10	15.8671
SUB1	-10.5208	47.3733	-6.98123	9.82e-12	6.71e-10	15.8492
MYC	-56.5994	130.526	-6.98057	9.86e-12	6.73e-10	15.845
UTP3	-7.92468	48.0144	-6.97916	9.95e-12	6.79e-10	15.8361
ZNF74	-2.03529	10.2021	-6.97776	1e-11	6.84e-10	15.8273
MGAT4B	-10.9218	52.8145	-6.97747	1.01e-11	6.84e-10	15.8255
SUPT16H	-9.58958	50.2454	-6.97672	1.01e-11	6.86e-10	15.8207
YEATS4	-7.18832	32.1452	-6.97665	1.01e-11	6.86e-10	15.8203
DDX18	-5.72611	24.8994	-6.97347	1.03e-11	7e-10	15.8002
MRPL19	-5.67713	25.3096	-6.97294	1.04e-11	7.01e-10	15.7969
SIKE1	-3.44795	15.4716	-6.9674	1.07e-11	7.26e-10	15.7619
NCBP1	-4.97468	23.1114	-6.96694	1.08e-11	7.27e-10	15.759
HNRNPLL	-3.83621	20.1585	-6.96203	1.11e-11	7.49e-10	15.728
IPO5	-10.2534	45.34	-6.96019	1.13e-11	7.57e-10	15.7164
CSNK1G3	-4.86324	19.7549	-6.95976	1.13e-11	7.59e-10	15.7137
SRSF9	-13.9613	82.2511	-6.95901	1.13e-11	7.6e-10	15.709
HNRNPCP2	-10.6089	37.1347	-6.95893	1.13e-11	7.6e-10	15.7085
CDC45	-1.81079	2.87128	-6.9589	1.13e-11	7.6e-10	15.7084
RPUSD4	-3.25277	19.2873	-6.95797	1.14e-11	7.64e-10	15.7024
RAMAC	-3.43046	22.4015	-6.95762	1.14e-11	7.64e-10	15.7003
RELA	-10.7423	66.6368	-6.9538	1.17e-11	7.81e-10	15.6762
SRSF4	-10.9906	76.7854	-6.9531	1.18e-11	7.84e-10	15.6718
SSB	-11.3411	64.4817	-6.95238	1.18e-11	7.87e-10	15.6672
C1orf109	-3.23212	14.5428	-6.9518	1.19e-11	7.89e-10	15.6636
RRN3	-9.35427	44.4559	-6.94599	1.23e-11	8.18e-10	15.627
POGK	-4.13179	17.825	-6.94574	1.23e-11	8.18e-10	15.6255
CPSF2	-3.33659	15.1263	-6.9452	1.24e-11	8.2e-10	15.622
FOPNL	-7.95951	43.7645	-6.94431	1.25e-11	8.24e-10	15.6165
ANKRD40	-6.09736	29.2378	-6.94402	1.25e-11	8.24e-10	15.6146
RNF138	-4.83886	18.8147	-6.94362	1.25e-11	8.25e-10	15.6122
IPO7	-20.0359	66.6434	-6.94338	1.25e-11	8.26e-10	15.6106
RSL24D1	-14.8941	98.0823	-6.94205	1.26e-11	8.32e-10	15.6023
KCTD20	-8.63159	38.074	-6.94131	1.27e-11	8.35e-10	15.5976
H2AZ1	-31.3529	141.145	-6.93999	1.28e-11	8.41e-10	15.5893
VBP1	-13.2969	74.2196	-6.93928	1.29e-11	8.44e-10	15.5848
DYNLL1	-23.9884	143.079	-6.93363	1.33e-11	8.74e-10	15.5494
DCTD	-11.4012	76.8389	-6.93302	1.34e-11	8.76e-10	15.5455
COL15A1	-16.5537	37.7366	-6.93119	1.36e-11	8.85e-10	15.534
AAMP	-24.1794	173.668	-6.93089	1.36e-11	8.86e-10	15.5321
RAB7A	-53.358	296.732	-6.92734	1.39e-11	9.05e-10	15.5098
SLC25A51	-1.64219	7.87135	-6.9261	1.4e-11	9.12e-10	15.5021
TTF2	-1.15328	3.67309	-6.92443	1.42e-11	9.2e-10	15.4915
LRR1	-1.62009	7.85178	-6.92433	1.42e-11	9.2e-10	15.4909
CDC7	-1.04652	2.47392	-6.92048	1.45e-11	9.42e-10	15.4668
ASNSD1	-7.86868	53.1264	-6.91951	1.46e-11	9.46e-10	15.4607
PSMD11	-6.85573	41.6382	-6.91875	1.47e-11	9.5e-10	15.4559
MPLKIP	-1.59468	10.8535	-6.91622	1.49e-11	9.64e-10	15.4401
AP1S2	-2.19937	9.21771	-6.91511	1.5e-11	9.7e-10	15.4331
FUT11	-2.04897	9.01895	-6.91471	1.51e-11	9.71e-10	15.4306
MCM5	-2.61664	13.0636	-6.91309	1.52e-11	9.8e-10	15.4204
OSBPL5	-5.34748	26.1543	-6.91206	1.53e-11	9.86e-10	15.414
NOP58	-10.873	65.3434	-6.90825	1.57e-11	1.01e-09	15.3901
EIF4ENIF1	-2.49442	15.7615	-6.90727	1.58e-11	1.01e-09	15.384
SIPA1L1	-2.85805	10.6602	-6.90564	1.6e-11	1.02e-09	15.3738
DYNC1I2	-10.4856	50.1057	-6.90405	1.61e-11	1.03e-09	15.3638
CYFIP2	-4.81222	15.8163	-6.90391	1.62e-11	1.03e-09	15.3629
FYTTD1	-6.17722	29.1412	-6.90104	1.65e-11	1.05e-09	15.345
UBE2A	-4.91756	30.0778	-6.9005	1.65e-11	1.05e-09	15.3416
SHMT2	-14.081	50.9098	-6.89913	1.67e-11	1.06e-09	15.333
HTATSF1	-10.8675	73.0653	-6.8961	1.7e-11	1.08e-09	15.3141
UBA3	-7.54007	37.6369	-6.89411	1.72e-11	1.09e-09	15.3016
GMIP	-3.37504	13.5874	-6.89389	1.72e-11	1.09e-09	15.3003
ENSA	-17.2733	104.995	-6.89294	1.73e-11	1.1e-09	15.2943
ESYT2	-10.631	47.2875	-6.89196	1.74e-11	1.1e-09	15.2882
RFC5	-2.62197	12.6885	-6.89125	1.75e-11	1.11e-09	15.2837
PMM2	-1.8956	6.96082	-6.88939	1.77e-11	1.12e-09	15.2722
AC115618.2	-10.1893	34.2712	-6.88876	1.78e-11	1.12e-09	15.2682
HSPA8	-202.476	756.963	-6.88568	1.81e-11	1.14e-09	15.2489
GNAS	-39.6041	243.245	-6.88504	1.82e-11	1.15e-09	15.2449
CASP2	-3.33905	11.626	-6.88222	1.86e-11	1.17e-09	15.2274
STAU1	-21.3753	120.843	-6.88182	1.86e-11	1.17e-09	15.2249
NOP16	-4.95391	21.0708	-6.87672	1.92e-11	1.2e-09	15.193
CPNE1	-16.53	81.1571	-6.87539	1.94e-11	1.21e-09	15.1847
VPS72	-4.4116	33.7232	-6.87426	1.95e-11	1.22e-09	15.1777
PPIF	-12.8837	56.9331	-6.87278	1.97e-11	1.23e-09	15.1684
HARS1	-3.14846	24.7442	-6.87253	1.97e-11	1.23e-09	15.1668
RBM8A	-7.87463	56.6515	-6.87065	2e-11	1.24e-09	15.1551
AL122010.1	-1.31452	6.30442	-6.86955	2.01e-11	1.25e-09	15.1483
HDHD5	-6.01794	34.0329	-6.86895	2.02e-11	1.26e-09	15.1445
CCDC6	-16.8287	55.4218	-6.86314	2.1e-11	1.3e-09	15.1083
EI24	-19.7357	125.667	-6.86299	2.1e-11	1.3e-09	15.1074
PRR11	-1.41031	2.30815	-6.86191	2.11e-11	1.31e-09	15.1007
PDS5A	-7.62351	30.2452	-6.86139	2.12e-11	1.31e-09	15.0974
DDX21	-21.5727	57.3917	-6.85965	2.14e-11	1.32e-09	15.0866
VIPAS39	-2.79462	18.0087	-6.85415	2.22e-11	1.37e-09	15.0524
INPP4A	-1.36387	5.47146	-6.85378	2.22e-11	1.37e-09	15.0501
B4GALT2	-7.79112	49.5661	-6.85062	2.27e-11	1.4e-09	15.0304
CDH11	-4.23765	8.70657	-6.85034	2.27e-11	1.4e-09	15.0286
MELK	-2.21296	3.24053	-6.84943	2.29e-11	1.4e-09	15.023
FRMD8	-4.84532	24.8933	-6.84618	2.33e-11	1.43e-09	15.0028
PDCD7	-2.98515	19.8454	-6.84493	2.35e-11	1.44e-09	14.995
EML4	-7.57156	23.75	-6.84479	2.36e-11	1.44e-09	14.9941
SYF2	-7.09878	53.0705	-6.84473	2.36e-11	1.44e-09	14.9937
GNA13	-8.57653	31.1671	-6.84332	2.38e-11	1.45e-09	14.985
LINC02688	2.88636	6.40615	6.84328	2.38e-11	1.45e-09	14.9848
FAM189B	-6.69711	27.1705	-6.84111	2.41e-11	1.47e-09	14.9713
ADAM17	-2.49616	8.38133	-6.83847	2.45e-11	1.49e-09	14.9549
FAM32A	-12.3517	121.093	-6.83613	2.49e-11	1.51e-09	14.9403
PPCS	-12.454	82.0317	-6.83607	2.49e-11	1.51e-09	14.9399
LHFPL6	-11.9045	34.3757	-6.83508	2.51e-11	1.52e-09	14.9338
POTEH-AS1	3.58247	4.80793	6.83249	2.55e-11	1.54e-09	14.9177
UQCRH	-55.4192	280.374	-6.83248	2.55e-11	1.54e-09	14.9176
SMAD2	-1.30945	6.34094	-6.8292	2.6e-11	1.57e-09	14.8973
RACGAP1	-3.75387	8.18284	-6.82489	2.67e-11	1.61e-09	14.8706
ACBD6	-2.29659	14.2518	-6.82327	2.7e-11	1.63e-09	14.8605
LRP5	-14.2872	58.0889	-6.82268	2.71e-11	1.63e-09	14.8569
RNF146	-5.4031	31.3153	-6.82146	2.73e-11	1.64e-09	14.8493
UBE2O	-4.4887	26.0614	-6.82095	2.74e-11	1.65e-09	14.8461
TSEN2	-1.06807	6.14945	-6.82082	2.74e-11	1.65e-09	14.8453
TTC27	-3.70816	21.035	-6.82082	2.74e-11	1.65e-09	14.8453
EFL1	-5.65854	21.2425	-6.82003	2.76e-11	1.65e-09	14.8404
ALYREF	-17.0047	99.3231	-6.81626	2.82e-11	1.69e-09	14.8171
COL3A1	-110.024	214.059	-6.8149	2.85e-11	1.7e-09	14.8087
PLEKHM2	-8.038	57.3324	-6.81453	2.85e-11	1.7e-09	14.8064
YWHAB	-46.0436	212.848	-6.81444	2.86e-11	1.7e-09	14.8058
SLC25A22	-8.70569	34.388	-6.81395	2.87e-11	1.71e-09	14.8028
ARSB	-1.71056	6.0227	-6.81351	2.87e-11	1.71e-09	14.8001
RAB22A	-2.49924	15.1183	-6.81339	2.88e-11	1.71e-09	14.7993
EXOSC3	-2.54164	16.7287	-6.81334	2.88e-11	1.71e-09	14.799
ASF1A	-5.19879	24.0078	-6.80916	2.95e-11	1.75e-09	14.7731
SDAD1	-7.14115	29.9035	-6.80818	2.97e-11	1.76e-09	14.7671
DFFB	-1.15798	5.47942	-6.80702	2.99e-11	1.77e-09	14.7599
PACC1	-2.96622	12.077	-6.80603	3.01e-11	1.78e-09	14.7538
UBAP1	-11.2236	76.6934	-6.80536	3.03e-11	1.78e-09	14.7496
ABCF1	-9.44771	64.2075	-6.80473	3.04e-11	1.79e-09	14.7457
NME2	-20.6308	84.5272	-6.80441	3.04e-11	1.79e-09	14.7437
TSN	-7.87402	46.5357	-6.80425	3.05e-11	1.79e-09	14.7427
CHERP	-5.47623	29.6541	-6.80422	3.05e-11	1.79e-09	14.7426
EIF2B1	-6.17767	47.9614	-6.80007	3.13e-11	1.84e-09	14.7169
NGDN	-2.0569	16.6246	-6.79967	3.14e-11	1.84e-09	14.7144
TPD52L2	-9.0825	75.9194	-6.79862	3.16e-11	1.85e-09	14.7079
EIF4E	-1.44972	7.48088	-6.79854	3.16e-11	1.85e-09	14.7074
SENP1	-1.87408	7.90493	-6.798	3.17e-11	1.85e-09	14.7041
HNRNPA2B1	-44.2005	285.235	-6.79307	3.27e-11	1.91e-09	14.6736
POFUT1	-7.50428	39.0128	-6.7909	3.32e-11	1.93e-09	14.6603
TLK2	-1.57752	10.6799	-6.79084	3.32e-11	1.93e-09	14.6599
VRK1	-1.79616	9.86245	-6.78967	3.34e-11	1.94e-09	14.6526
YBX3	-15.9836	64.5127	-6.78914	3.35e-11	1.95e-09	14.6493
ZCCHC7	-2.80529	15.954	-6.78579	3.42e-11	1.99e-09	14.6287
LAPTM4B	-16.2377	40.262	-6.78432	3.46e-11	2e-09	14.6196
CAPN2	-15.9922	55.4176	-6.78306	3.48e-11	2.02e-09	14.6118
QTRT2	-1.97927	8.60399	-6.78137	3.52e-11	2.04e-09	14.6014
PTK2	-6.48331	26.2603	-6.78021	3.55e-11	2.05e-09	14.5943
HNRNPA3	-20.2607	129.597	-6.77983	3.56e-11	2.05e-09	14.5919
RNF8	-1.09828	8.29869	-6.77689	3.62e-11	2.09e-09	14.5738
MCM4	-6.03767	14.1116	-6.77602	3.64e-11	2.1e-09	14.5684
CEBPZ	-8.66484	42.4362	-6.77517	3.66e-11	2.11e-09	14.5632
XPNPEP3	-1.39064	7.21707	-6.77438	3.68e-11	2.12e-09	14.5583
AAR2	-6.99755	53.0669	-6.77419	3.68e-11	2.12e-09	14.5571
PHF14	-3.71778	18.0348	-6.77313	3.71e-11	2.13e-09	14.5506
SLC25A32	-4.73518	19.6506	-6.77298	3.71e-11	2.13e-09	14.5496
MRPL50	-5.17405	30.7293	-6.77176	3.74e-11	2.14e-09	14.5421
CDR2L	-9.041	26.8054	-6.77155	3.75e-11	2.14e-09	14.5409
RPL7L1	-11.3978	61.8212	-6.76871	3.81e-11	2.18e-09	14.5234
UBP1	-4.10297	21.7317	-6.76795	3.83e-11	2.19e-09	14.5187
HECTD3	-3.42384	25.3061	-6.76637	3.87e-11	2.21e-09	14.509
COIL	-3.77224	21.8105	-6.76489	3.91e-11	2.22e-09	14.4998
COL4A1	-31.52	73.157	-6.76473	3.91e-11	2.22e-09	14.4988
BRD1	-4.9605	26.3982	-6.76466	3.91e-11	2.22e-09	14.4984
PLPP2	-10.3063	23.1765	-6.76454	3.92e-11	2.22e-09	14.4977
GARS1	-13.4188	67.5674	-6.76419	3.92e-11	2.22e-09	14.4956
NUDT5	-3.19961	21.6059	-6.7629	3.96e-11	2.24e-09	14.4876
ZNF598	-5.37355	29.3836	-6.76252	3.97e-11	2.24e-09	14.4853
C5orf15	-22.4253	102.858	-6.7612	4e-11	2.26e-09	14.4771
GPKOW	-6.04514	45.988	-6.76025	4.02e-11	2.27e-09	14.4713
KIF20A	-2.49199	3.63199	-6.75926	4.05e-11	2.28e-09	14.4652
CDC20	-6.52523	9.29137	-6.7547	4.17e-11	2.35e-09	14.4371
NSA2	-10.6009	56.3171	-6.75361	4.19e-11	2.36e-09	14.4305
MTDH	-20.1609	65.4772	-6.75181	4.24e-11	2.38e-09	14.4194
RNF220	-2.40599	22.1735	-6.75141	4.25e-11	2.39e-09	14.4169
SINHCAF	-8.13327	28.0174	-6.7512	4.26e-11	2.39e-09	14.4156
USP22	-31.5271	124.565	-6.74998	4.29e-11	2.4e-09	14.4081
GRAMD1A	-12.5006	59.0156	-6.74383	4.46e-11	2.5e-09	14.3703
IARS1	-12.83	51.5387	-6.74049	4.56e-11	2.54e-09	14.3498
SLBP	-12.6515	65.0217	-6.73888	4.6e-11	2.57e-09	14.34
GUCY1B1	-7.56524	20.4444	-6.7363	4.68e-11	2.6e-09	14.3241
HYAL2	-6.04463	34.4212	-6.73557	4.7e-11	2.61e-09	14.3197
DALRD3	-3.74189	16.8543	-6.73478	4.72e-11	2.62e-09	14.3148
LAP3	-13.2716	62.8426	-6.73227	4.8e-11	2.66e-09	14.2994
ANP32A	-10.5712	70.5881	-6.73129	4.83e-11	2.68e-09	14.2934
MRTO4	-7.61888	50.5895	-6.73091	4.84e-11	2.68e-09	14.291
ZNF584	-1.13606	7.52819	-6.73028	4.86e-11	2.69e-09	14.2872
TPX2	-6.23476	9.28188	-6.7297	4.87e-11	2.69e-09	14.2836
BGN	-161.985	368.499	-6.72889	4.9e-11	2.71e-09	14.2787
UTP25	-1.68743	6.58365	-6.72722	4.95e-11	2.73e-09	14.2684
SRSF2	-17.0235	111.933	-6.72572	5e-11	2.75e-09	14.2593
GLB1	-14.1758	53.8187	-6.72505	5.02e-11	2.76e-09	14.2552
ATP5F1A	-23.333	139.897	-6.72405	5.05e-11	2.78e-09	14.249
CKAP5	-9.5977	38.1957	-6.72314	5.08e-11	2.79e-09	14.2435
RAB31	-6.24249	17.9393	-6.72284	5.09e-11	2.79e-09	14.2416
SMAD5	-7.32493	25.8935	-6.72275	5.09e-11	2.79e-09	14.2411
ENTPD1	-2.0299	7.56167	-6.72037	5.17e-11	2.83e-09	14.2265
OGFOD1	-3.11741	17.4564	-6.71858	5.23e-11	2.86e-09	14.2155
ZNF197	-2.01187	9.77942	-6.71785	5.25e-11	2.87e-09	14.2111
HSPA4	-12.9556	69.6064	-6.71748	5.26e-11	2.87e-09	14.2088
PNPT1	-3.6884	17.3527	-6.71683	5.28e-11	2.88e-09	14.2048
UBE2Z	-11.9472	78.0378	-6.71446	5.36e-11	2.92e-09	14.1903
ACO2	-16.2323	78.4248	-6.71424	5.37e-11	2.92e-09	14.189
CDC27	-4.7114	21.2216	-6.71372	5.39e-11	2.93e-09	14.1858
GTPBP8	-1.44286	7.57459	-6.71317	5.41e-11	2.94e-09	14.1824
PPIL1	-8.6625	50.3518	-6.71299	5.41e-11	2.94e-09	14.1813
DARS2	-5.85501	21.1987	-6.71201	5.45e-11	2.95e-09	14.1754
ZNF354A	-1.91278	9.73273	-6.70734	5.61e-11	3.04e-09	14.1468
SLC35B2	-22.2718	121.462	-6.70634	5.64e-11	3.05e-09	14.1407
SH3RF3	-2.43319	7.17421	-6.70507	5.69e-11	3.07e-09	14.1329
GLS	-3.71694	14.6508	-6.70402	5.73e-11	3.09e-09	14.1265
MRFAP1	-52.9874	421.74	-6.70271	5.77e-11	3.11e-09	14.1185
NARS1	-22.9001	114.944	-6.70206	5.8e-11	3.12e-09	14.1145
COA4	-11.7613	81.3535	-6.69663	6e-11	3.23e-09	14.0813
ZNF346	-1.30562	9.76253	-6.69326	6.12e-11	3.29e-09	14.0608
PTDSS1	-9.55934	38.5348	-6.69246	6.16e-11	3.3e-09	14.0559
NAE1	-4.44497	24.3735	-6.69176	6.18e-11	3.31e-09	14.0516
TATDN1	-2.65206	12.4795	-6.69102	6.21e-11	3.33e-09	14.0471
CDCA8	-2.5647	5.6216	-6.69063	6.23e-11	3.33e-09	14.0447
PTTG1IP	-32.3855	259.873	-6.68997	6.25e-11	3.34e-09	14.0407
MRPL47	-10.6595	63.9956	-6.68931	6.28e-11	3.35e-09	14.0367
PSME4	-7.16502	30.3001	-6.68647	6.39e-11	3.41e-09	14.0193
GEMIN5	-3.45757	15.6402	-6.68338	6.51e-11	3.47e-09	14.0005
NCAPG	-1.50813	2.02646	-6.68123	6.6e-11	3.51e-09	13.9874
RAD21	-24.9058	87.5778	-6.67983	6.66e-11	3.54e-09	13.9789
PODXL	-9.69598	27.6913	-6.678	6.74e-11	3.58e-09	13.9678
VAV2	-8.0523	36.1965	-6.67712	6.77e-11	3.6e-09	13.9624
SRFBP1	-3.35563	11.9202	-6.67671	6.79e-11	3.6e-09	13.9599
COX11	-3.69295	19.9946	-6.67609	6.82e-11	3.61e-09	13.9561
LRRC59	-23.1232	117.458	-6.67335	6.94e-11	3.67e-09	13.9394
PPIA	-31.739	204.897	-6.67236	6.98e-11	3.69e-09	13.9334
TOP2A	-7.85586	9.7816	-6.67179	7e-11	3.7e-09	13.9299
PAIP2	-12.8842	74.3171	-6.67069	7.05e-11	3.72e-09	13.9232
TCFL5	-1.91309	10.4313	-6.67017	7.07e-11	3.73e-09	13.92
BUB1	-1.64166	2.35472	-6.6696	7.1e-11	3.73e-09	13.9166
ZNF143	-1.85177	10.4208	-6.66936	7.11e-11	3.74e-09	13.9152
RABGGTB	-5.48545	28.3385	-6.66752	7.19e-11	3.78e-09	13.9039
KCNAB2	-1.27593	4.23804	-6.66658	7.23e-11	3.8e-09	13.8982
ARMC10	-4.85917	26.6378	-6.66639	7.24e-11	3.8e-09	13.8971
ATP5F1C	-25.2087	187.185	-6.66567	7.28e-11	3.81e-09	13.8927
KATNA1	-2.74481	21.3057	-6.66526	7.29e-11	3.82e-09	13.8902
SDC3	-10.7722	41.6934	-6.66429	7.34e-11	3.83e-09	13.8843
STT3B	-26.2014	123.026	-6.66138	7.47e-11	3.9e-09	13.8666
PIMREG	-1.38171	2.27817	-6.66107	7.49e-11	3.9e-09	13.8647
CTSZ	-41.687	220.953	-6.65893	7.59e-11	3.95e-09	13.8517
RRAS2	-3.30868	21.6662	-6.65706	7.68e-11	3.98e-09	13.8404
FOXK2	-2.78452	16.8881	-6.65275	7.88e-11	4.09e-09	13.8142
TAFA5	-5.77041	9.7361	-6.65129	7.96e-11	4.12e-09	13.8053
YWHAH	-23.3571	101.64	-6.64935	8.05e-11	4.17e-09	13.7936
ANAPC10	-1.07124	7.26461	-6.64719	8.16e-11	4.22e-09	13.7804
SEPHS1	-5.69549	46.5342	-6.64345	8.35e-11	4.32e-09	13.7577
H3-3A	-6.83765	32.3942	-6.63487	8.81e-11	4.54e-09	13.7057
TBC1D10B	-3.24586	25.8405	-6.63382	8.87e-11	4.57e-09	13.6994
HIP1	-6.22171	16.2083	-6.63375	8.87e-11	4.57e-09	13.699
SETDB1	-3.1293	15.3049	-6.63349	8.89e-11	4.57e-09	13.6974
TIMM9	-7.91215	54.247	-6.63043	9.06e-11	4.65e-09	13.6789
PHTF2	-1.60664	5.28489	-6.62912	9.13e-11	4.69e-09	13.6709
PCNP	-21.6907	115.719	-6.62468	9.39e-11	4.81e-09	13.6441
TYMS	-4.07441	9.03014	-6.62452	9.4e-11	4.81e-09	13.643
MRPS22	-2.95056	14.7333	-6.62424	9.41e-11	4.82e-09	13.6414
SLC35C1	-4.56798	22.8495	-6.62378	9.44e-11	4.83e-09	13.6386
HMGB1	-11.2148	79.1002	-6.62257	9.51e-11	4.86e-09	13.6313
NUP107	-1.89275	10.2004	-6.62113	9.6e-11	4.9e-09	13.6225
PDIA6	-44.9258	176.933	-6.6199	9.67e-11	4.93e-09	13.6151
WDR77	-5.86592	36.7285	-6.6173	9.83e-11	5e-09	13.5994
ATXN7L3	-6.34316	36.9774	-6.61523	9.95e-11	5.06e-09	13.5869
MEN1	-6.82174	43.0167	-6.61483	9.98e-11	5.07e-09	13.5845
DLST	-9.43775	64.2455	-6.6142	1e-10	5.08e-09	13.5807
NSMF	-8.68114	34.1124	-6.61355	1.01e-10	5.1e-09	13.5767
COL1A2	-75.6851	164.557	-6.61158	1.02e-10	5.16e-09	13.5648
COPS7B	-2.21191	18.3948	-6.60765	1.04e-10	5.27e-09	13.5411
DDX19A	-2.00081	11.4361	-6.60595	1.05e-10	5.32e-09	13.5308
COP1	-4.35347	29.575	-6.60392	1.07e-10	5.39e-09	13.5186
ZC3H7B	-11.4873	52.3695	-6.60362	1.07e-10	5.39e-09	13.5168
POLR2B	-11.0558	47.9719	-6.60104	1.09e-10	5.47e-09	13.5012
SNRPD3	-17.6121	124.913	-6.60016	1.09e-10	5.5e-09	13.4959
PRKX	-2.51392	9.17989	-6.59775	1.11e-10	5.56e-09	13.4814
WDR89	-3.08512	15.8263	-6.59724	1.11e-10	5.58e-09	13.4783
CCNB1	-6.66314	15.0198	-6.59556	1.12e-10	5.63e-09	13.4681
CTSK	-16.7068	42.5299	-6.59206	1.15e-10	5.75e-09	13.447
KEAP1	-10.6408	82.6413	-6.58801	1.18e-10	5.88e-09	13.4227
FBXL19	-3.3361	17.3185	-6.5828	1.22e-10	6.06e-09	13.3913
MKI67	-3.13727	5.07169	-6.58201	1.22e-10	6.09e-09	13.3865
TXNRD3	-1.8314	8.64453	-6.58133	1.23e-10	6.11e-09	13.3824
ABRACL	-16.0411	52.566	-6.58074	1.23e-10	6.12e-09	13.3789
CPSF6	-6.27116	34.0621	-6.57987	1.24e-10	6.15e-09	13.3737
PKD2	-5.74146	18.9772	-6.57743	1.26e-10	6.24e-09	13.359
TARS2	-4.44476	24.6716	-6.577	1.26e-10	6.25e-09	13.3564
IPO9	-3.74199	18.8179	-6.57435	1.28e-10	6.35e-09	13.3405
SPAG5	-2.28238	4.42817	-6.57424	1.28e-10	6.35e-09	13.3398
PPP2R5A	-7.32345	41.9007	-6.57379	1.29e-10	6.36e-09	13.3371
QKI	-2.69837	9.15827	-6.5736	1.29e-10	6.36e-09	13.3359
PHF6	-3.6063	12.7782	-6.5721	1.3e-10	6.41e-09	13.327
NDUFAF4	-3.21642	17.2935	-6.56884	1.33e-10	6.53e-09	13.3073
LSM14A	-14.4012	89.1701	-6.56869	1.33e-10	6.53e-09	13.3064
HAT1	-4.52294	23.5401	-6.56786	1.33e-10	6.56e-09	13.3015
TRUB2	-4.69049	29.752	-6.56733	1.34e-10	6.57e-09	13.2983
NOLC1	-23.5123	108.855	-6.56559	1.35e-10	6.64e-09	13.2878
YWHAQ	-76.241	404.776	-6.56451	1.36e-10	6.68e-09	13.2813
KDM5B	-6.64846	26.5512	-6.56358	1.37e-10	6.71e-09	13.2758
CDC42EP5	72.892	116.658	6.56243	1.38e-10	6.75e-09	13.2688
NABP2	-6.4021	47.2279	-6.56234	1.38e-10	6.75e-09	13.2683
DPM1	-10.6864	71.2319	-6.55799	1.42e-10	6.93e-09	13.2422
KPNA4	-5.50741	29.7851	-6.55753	1.42e-10	6.94e-09	13.2395
DAG1	-19.6761	82.1321	-6.55722	1.42e-10	6.95e-09	13.2376
TXNL1	-3.29287	21.8805	-6.55583	1.44e-10	7e-09	13.2292
UBE2T	-6.28366	13.0292	-6.55411	1.45e-10	7.07e-09	13.2189
C2orf49	-2.60613	12.8068	-6.55352	1.46e-10	7.09e-09	13.2154
EXOSC2	-2.86467	18.3586	-6.55192	1.47e-10	7.15e-09	13.2058
NAP1L4	-8.37598	78.6761	-6.54948	1.49e-10	7.25e-09	13.1911
EIF2B3	-3.43927	24.2427	-6.54514	1.53e-10	7.44e-09	13.1652
BCR	-3.41825	18.136	-6.54421	1.54e-10	7.47e-09	13.1596
SRI	-9.86406	58.027	-6.54408	1.54e-10	7.47e-09	13.1588
MRPL42	-2.59339	13.9412	-6.54399	1.54e-10	7.47e-09	13.1583
PSMD2	-19.6756	102.477	-6.54391	1.55e-10	7.47e-09	13.1578
DENND6A	-3.32224	15.6929	-6.54375	1.55e-10	7.47e-09	13.1569
NIPSNAP2	-10.2088	54.6871	-6.54263	1.56e-10	7.52e-09	13.1501
ORC3	-4.19964	20.0165	-6.54159	1.57e-10	7.56e-09	13.1439
EIF5	-11.5509	57.0011	-6.54058	1.58e-10	7.59e-09	13.1379
NOP9	-4.82344	25.434	-6.53762	1.61e-10	7.72e-09	13.1202
LAD1	-13.5294	58.9338	-6.53757	1.61e-10	7.72e-09	13.1198
CAMSAP2	-4.63782	17.503	-6.53542	1.63e-10	7.81e-09	13.107
ASCC1	-2.94375	10.8448	-6.53518	1.63e-10	7.82e-09	13.1056
YY1	-5.86562	41.0152	-6.53477	1.63e-10	7.83e-09	13.1031
MOXD1	-11.2032	22.5469	-6.53398	1.64e-10	7.86e-09	13.0984
PARP2	-1.84849	11.4641	-6.5331	1.65e-10	7.9e-09	13.0931
HBS1L	-1.8817	11.1304	-6.53143	1.67e-10	7.97e-09	13.0831
PEX26	-1.34418	8.98793	-6.52814	1.7e-10	8.13e-09	13.0634
TRAF3IP1	-3.14088	16.9819	-6.52721	1.71e-10	8.17e-09	13.0579
LETM1	-4.06785	21.711	-6.52407	1.74e-10	8.32e-09	13.0391
PSMA7	-41.75	234.628	-6.52356	1.75e-10	8.34e-09	13.0361
ETF1	-13.1819	72.9403	-6.52339	1.75e-10	8.34e-09	13.0351
DELE1	-7.19631	42.0181	-6.5209	1.78e-10	8.46e-09	13.0202
RILPL1	-1.25388	8.19867	-6.51669	1.83e-10	8.67e-09	12.9951
SRSF10	-4.3208	25.1554	-6.51645	1.83e-10	8.68e-09	12.9936
POLD1	-1.98442	9.76627	-6.5151	1.84e-10	8.74e-09	12.9856
NTMT1	-2.87098	17.7699	-6.51497	1.84e-10	8.74e-09	12.9848
CLP1	-1.56038	10.7559	-6.51253	1.87e-10	8.87e-09	12.9702
RABEPK	-2.77176	18.5011	-6.51097	1.89e-10	8.94e-09	12.9609
PRPSAP1	-3.32137	18.2204	-6.50854	1.92e-10	9.07e-09	12.9464
MT-TE	1.25111	1.48737	6.5074	1.93e-10	9.12e-09	12.9396
RHOT1	-3.39948	18.1904	-6.50617	1.95e-10	9.19e-09	12.9323
DHX35	-1.30811	7.39623	-6.50208	2e-10	9.41e-09	12.908
TEX10	-1.9281	11.7821	-6.50182	2e-10	9.42e-09	12.9064
CBFB	-7.4748	29.9111	-6.4992	2.03e-10	9.56e-09	12.8908
MSL3	-2.28777	11.8501	-6.49913	2.03e-10	9.56e-09	12.8903
PCSK6	-1.98669	4.97159	-6.49887	2.04e-10	9.56e-09	12.8888
NCAPG2	-2.13164	6.3456	-6.49665	2.06e-10	9.68e-09	12.8756
ACVR1	-6.00862	24.9541	-6.49551	2.08e-10	9.74e-09	12.8688
SMARCA4	-9.0613	54.3973	-6.49544	2.08e-10	9.74e-09	12.8684
DDX52	-1.63006	9.27767	-6.49481	2.09e-10	9.77e-09	12.8646
DTL	-1.38949	2.00152	-6.49432	2.09e-10	9.79e-09	12.8617
RAD1	-2.59114	13.6497	-6.49094	2.14e-10	9.98e-09	12.8416
ZNF277	-3.64271	18.0494	-6.49088	2.14e-10	9.98e-09	12.8412
OSGIN2	-4.03365	16.249	-6.49042	2.14e-10	1e-08	12.8385
ADAMTS2	-3.00801	5.86452	-6.48891	2.16e-10	1.01e-08	12.8296
RGS3	-2.16655	8.77066	-6.48788	2.18e-10	1.01e-08	12.8234
TAF5L	-2.18343	11.5877	-6.48774	2.18e-10	1.01e-08	12.8226
DDB1	-12.7971	74.1647	-6.48747	2.18e-10	1.01e-08	12.821
DHX57	-1.95955	10.4801	-6.48705	2.19e-10	1.02e-08	12.8185
SRP72	-16.742	76.0347	-6.48528	2.21e-10	1.03e-08	12.8079
AP2A1	-5.17036	32.3355	-6.48482	2.22e-10	1.03e-08	12.8052
CPOX	-2.74897	14.1002	-6.48407	2.23e-10	1.03e-08	12.8008
CTIF	-2.40279	11.006	-6.48233	2.25e-10	1.04e-08	12.7904
DDX23	-9.35356	64.1576	-6.47377	2.37e-10	1.1e-08	12.7396
DNAJA2	-8.84182	53.5287	-6.47322	2.38e-10	1.1e-08	12.7363
RAVER1	-4.49227	17.5993	-6.47313	2.38e-10	1.1e-08	12.7358
B4GALT5	-9.03501	38.2349	-6.47302	2.38e-10	1.1e-08	12.7351
DESI2	-5.05969	21.2059	-6.46922	2.44e-10	1.12e-08	12.7126
CHIC2	-5.05887	32.019	-6.46683	2.47e-10	1.14e-08	12.6984
PRDX3	-33.5836	168.96	-6.46392	2.52e-10	1.16e-08	12.6812
RANBP1	-4.94658	30.5853	-6.46384	2.52e-10	1.16e-08	12.6807
MED17	-1.82814	9.15556	-6.46321	2.53e-10	1.16e-08	12.677
NELFA	-3.0723	21.8978	-6.4612	2.56e-10	1.17e-08	12.665
SLC29A1	-8.57305	28.23	-6.45885	2.6e-10	1.19e-08	12.6511
FUT8	-2.14973	8.27932	-6.45846	2.6e-10	1.19e-08	12.6488
HNRNPM	-17.7908	122.735	-6.45835	2.61e-10	1.19e-08	12.6482
ACTR3B	-1.05257	5.62252	-6.458	2.61e-10	1.19e-08	12.6461
BCAS2	-14.5668	94.6884	-6.45771	2.62e-10	1.19e-08	12.6444
DNTTIP1	-7.04389	39.0974	-6.45617	2.64e-10	1.2e-08	12.6353
PRXL2B	-11.0228	35.9783	-6.45591	2.64e-10	1.21e-08	12.6337
IFNAR2	-1.87435	7.40724	-6.45412	2.67e-10	1.22e-08	12.6231
SNRPA1	-3.50503	20.8488	-6.45241	2.7e-10	1.23e-08	12.613
SIRT2	-4.38492	31.4702	-6.45076	2.73e-10	1.24e-08	12.6032
MRPS18B	-16.0089	109.854	-6.45026	2.74e-10	1.24e-08	12.6002
GAB2	-2.36661	7.72547	-6.44979	2.74e-10	1.25e-08	12.5975
SNRPC	-18.6637	142.559	-6.44908	2.76e-10	1.25e-08	12.5933
ARL2BP	-1.81427	7.27894	-6.44886	2.76e-10	1.25e-08	12.592
IAH1	-2.91573	18.4583	-6.44698	2.79e-10	1.26e-08	12.5809
PRC1	-2.93614	6.87739	-6.44663	2.8e-10	1.26e-08	12.5788
RIC8A	-6.37926	51.7743	-6.44651	2.8e-10	1.26e-08	12.5781
RRP15	-1.65264	8.48209	-6.44252	2.87e-10	1.29e-08	12.5545
NECAP2	-4.65537	34.5786	-6.44112	2.89e-10	1.3e-08	12.5462
ATL3	-8.89203	38.9167	-6.44097	2.9e-10	1.3e-08	12.5453
MNAT1	-1.93991	13.749	-6.44035	2.91e-10	1.31e-08	12.5416
FADD	-2.17266	12.4939	-6.44004	2.91e-10	1.31e-08	12.5398
YWHAE	-71.6999	472.316	-6.43934	2.92e-10	1.31e-08	12.5357
HSF1	-10.9572	61.3292	-6.43837	2.94e-10	1.32e-08	12.5299
UBIAD1	-3.72874	21.9958	-6.43824	2.94e-10	1.32e-08	12.5292
CCDC97	-5.40418	38.4568	-6.43649	2.98e-10	1.33e-08	12.5188
NOTCH3	-10.252	28.8223	-6.43476	3.01e-10	1.35e-08	12.5087
SPC25	-1.39791	2.47498	-6.43456	3.01e-10	1.35e-08	12.5075
DOCK6	-1.70666	8.02366	-6.43414	3.02e-10	1.35e-08	12.505
HARS2	-3.51699	25.9567	-6.43392	3.02e-10	1.35e-08	12.5036
MAD2L1	-1.689	4.23592	-6.43006	3.09e-10	1.38e-08	12.4809
NAP1L1	-18.986	75.9665	-6.42833	3.13e-10	1.39e-08	12.4707
CHRNA2	45.9773	94.6219	6.42828	3.13e-10	1.39e-08	12.4704
COPS8	-3.70353	29.0908	-6.42804	3.13e-10	1.39e-08	12.469
ATP23	-1.69462	11.01	-6.42656	3.16e-10	1.4e-08	12.4602
RBP7	9.43951	25.8058	6.42638	3.16e-10	1.4e-08	12.4592
LRRFIP1	-10.8864	45.846	-6.42629	3.16e-10	1.4e-08	12.4586
RALGDS	-9.97944	40.2867	-6.42466	3.2e-10	1.42e-08	12.449
TRIM37	-5.30309	23.379	-6.42161	3.26e-10	1.44e-08	12.4311
RTRAF	-5.47013	48.0204	-6.42156	3.26e-10	1.44e-08	12.4308
MRAS	-2.46802	8.60986	-6.42155	3.26e-10	1.44e-08	12.4307
DDX42	-8.26252	53.0911	-6.42063	3.28e-10	1.45e-08	12.4253
CALHM2	-3.47426	11.7513	-6.41983	3.29e-10	1.45e-08	12.4206
HADH	-11.3219	77.2018	-6.41814	3.32e-10	1.46e-08	12.4106
MMADHC	-27.6275	136.336	-6.41813	3.32e-10	1.46e-08	12.4106
LEO1	-8.25123	38.7907	-6.41726	3.34e-10	1.47e-08	12.4054
RTL6	-7.59152	28.2455	-6.41441	3.4e-10	1.5e-08	12.3886
DCAF12	-10.142	48.0384	-6.41391	3.41e-10	1.5e-08	12.3857
NEK4	-2.90164	11.169	-6.41331	3.42e-10	1.5e-08	12.3821
SF3B4	-15.3895	104.986	-6.41233	3.44e-10	1.51e-08	12.3764
RBBP8	-2.36371	10.0493	-6.41227	3.44e-10	1.51e-08	12.376
UGDH	-48.1324	123.09	-6.41121	3.47e-10	1.52e-08	12.3698
AHCTF1	-3.4021	14.1966	-6.41098	3.47e-10	1.52e-08	12.3684
RIPOR1	-6.06126	31.6371	-6.40996	3.49e-10	1.53e-08	12.3624
EPCAM	-106.476	376.656	-6.40887	3.52e-10	1.54e-08	12.356
SAMD4B	-6.53268	42.294	-6.40842	3.53e-10	1.54e-08	12.3534
THOC3	-1.42255	6.78348	-6.40828	3.53e-10	1.54e-08	12.3525
CNOT2	-1.89905	12.561	-6.40613	3.58e-10	1.56e-08	12.3399
COPS4	-5.11395	33.499	-6.4061	3.58e-10	1.56e-08	12.3397
C15orf39	-3.46431	13.2831	-6.40174	3.67e-10	1.6e-08	12.3141
SRM	-30.5309	137.64	-6.40135	3.68e-10	1.6e-08	12.3118
POLDIP3	-14.801	100.689	-6.40115	3.68e-10	1.6e-08	12.3106
JADE3	-2.32515	9.76285	-6.39998	3.71e-10	1.61e-08	12.3037
POLR1A	-3.74624	15.4393	-6.39743	3.77e-10	1.63e-08	12.2887
STIL	-1.35995	3.76199	-6.39727	3.77e-10	1.63e-08	12.2878
SUZ12	-5.53053	20.7712	-6.39652	3.79e-10	1.64e-08	12.2834
NUDT19	-7.21171	40.5628	-6.39612	3.8e-10	1.64e-08	12.281
TRMT6	-2.76527	13.18	-6.39227	3.89e-10	1.68e-08	12.2584
UPF3B	-2.90042	16.8681	-6.39171	3.9e-10	1.68e-08	12.2551
CYRIB	-2.67479	10.1895	-6.39096	3.92e-10	1.69e-08	12.2507
AC026689.1	2.50388	7.93905	6.39075	3.92e-10	1.69e-08	12.2495
ZNF260	-3.51409	14.8572	-6.39022	3.94e-10	1.69e-08	12.2464
DEDD	-4.52744	38.0557	-6.38899	3.96e-10	1.7e-08	12.2391
NADK	-5.92551	40.1336	-6.38894	3.97e-10	1.7e-08	12.2389
TRIM16L	-1.03383	4.30874	-6.38799	3.99e-10	1.71e-08	12.2333
TOP2B	-25.6977	105.131	-6.38766	4e-10	1.71e-08	12.2314
DVL3	-8.21783	53.7572	-6.38732	4e-10	1.72e-08	12.2293
TSFM	-3.63049	25.6298	-6.3871	4.01e-10	1.72e-08	12.2281
NELFCD	-7.07451	48.434	-6.38674	4.02e-10	1.72e-08	12.226
PTPRK	-10.4091	32.3967	-6.38526	4.05e-10	1.73e-08	12.2173
EIF3F	-8.49786	59.8004	-6.38467	4.07e-10	1.74e-08	12.2138
CERS2	-25.6252	112.432	-6.38437	4.08e-10	1.74e-08	12.212
NUP50	-4.45392	22.3288	-6.38398	4.09e-10	1.74e-08	12.2097
HMCES	-8.24124	58.1763	-6.38387	4.09e-10	1.74e-08	12.2091
SRSF3	-14.0033	107.72	-6.38337	4.1e-10	1.75e-08	12.2062
PABPC1	-355.935	1183.73	-6.3828	4.12e-10	1.75e-08	12.2028
LSR	-32.7838	169.975	-6.38051	4.17e-10	1.77e-08	12.1894
COQ5	-5.79179	40.1168	-6.37801	4.24e-10	1.8e-08	12.1748
WDR70	-1.66559	11.9367	-6.3777	4.24e-10	1.8e-08	12.1729
FAM136A	-7.55124	49.6229	-6.37753	4.25e-10	1.8e-08	12.1719
ANTXR1	-16.4107	41.2056	-6.37665	4.27e-10	1.81e-08	12.1667
CASP8	-2.24077	8.88479	-6.37512	4.31e-10	1.82e-08	12.1578
SNRK	-4.3846	17.4578	-6.37459	4.32e-10	1.83e-08	12.1547
SLC41A2	-1.5708	4.28151	-6.37409	4.34e-10	1.83e-08	12.1518
WDR46	-7.67794	52.2194	-6.37317	4.36e-10	1.84e-08	12.1464
CYFIP1	-10.8304	52.0518	-6.37313	4.36e-10	1.84e-08	12.1462
BLZF1	-3.48044	17.4103	-6.37056	4.43e-10	1.87e-08	12.1311
ZNF367	-1.39526	2.89142	-6.37035	4.43e-10	1.87e-08	12.1299
KLHL18	-1.64926	8.31343	-6.36954	4.46e-10	1.87e-08	12.1251
NOL6	-7.55927	37.8577	-6.36633	4.54e-10	1.91e-08	12.1064
POLR2D	-4.17365	24.975	-6.35939	4.74e-10	1.99e-08	12.0657
RPA1	-9.21682	54.9779	-6.35894	4.75e-10	1.99e-08	12.0631
TMEM119	-8.50821	19.5556	-6.35855	4.76e-10	2e-08	12.0608
FAM222A-AS1	-1.12112	2.25815	-6.35794	4.78e-10	2e-08	12.0572
XYLB	-1.27199	4.16154	-6.35697	4.81e-10	2.01e-08	12.0516
ANKRD28	-2.74588	12.8072	-6.35254	4.94e-10	2.06e-08	12.0257
AC009131.1	1.76779	1.95696	6.35249	4.94e-10	2.06e-08	12.0254
FAM222B	-5.5197	24.5985	-6.35243	4.94e-10	2.06e-08	12.025
MAP4K3	-5.99024	22.4989	-6.35084	4.99e-10	2.08e-08	12.0158
SAE1	-9.88542	71.7111	-6.35051	5e-10	2.08e-08	12.0139
MBLAC2	-1.6802	5.99774	-6.35011	5.01e-10	2.08e-08	12.0115
INTS14	-5.66188	38.761	-6.34974	5.02e-10	2.09e-08	12.0094
CHD4	-13.7722	78.4723	-6.34911	5.04e-10	2.09e-08	12.0056
INTS7	-2.85602	13.395	-6.34732	5.09e-10	2.11e-08	11.9952
ZNF195	-2.27255	13.0978	-6.34648	5.12e-10	2.12e-08	11.9903
VPS35	-9.66078	45.3462	-6.34594	5.13e-10	2.13e-08	11.9872
DPY19L1	-2.36072	7.83838	-6.34354	5.21e-10	2.16e-08	11.9731
CDK7	-5.71251	31.4055	-6.34042	5.31e-10	2.2e-08	11.955
STX3	-6.16467	29.8228	-6.33938	5.34e-10	2.21e-08	11.9489
RFX1	-2.26286	12.6717	-6.33758	5.4e-10	2.23e-08	11.9384
C8orf33	-14.6621	65.0723	-6.33746	5.4e-10	2.23e-08	11.9377
INCENP	-2.40013	8.45137	-6.33546	5.47e-10	2.25e-08	11.926
COL1A1	-87.4679	165.374	-6.33442	5.5e-10	2.27e-08	11.92
NREP	-3.61653	12.8537	-6.33437	5.5e-10	2.27e-08	11.9197
USF2	-9.57482	76.2998	-6.33343	5.53e-10	2.28e-08	11.9142
MARK4	-2.78684	20.0859	-6.33337	5.54e-10	2.28e-08	11.9139
GZF1	-1.83067	10.594	-6.33283	5.55e-10	2.28e-08	11.9107
GGNBP2	-2.71006	18.6097	-6.33169	5.59e-10	2.3e-08	11.9041
LRRC8B	-4.76519	16.454	-6.33053	5.63e-10	2.31e-08	11.8973
UTP15	-1.41074	7.45649	-6.32999	5.65e-10	2.32e-08	11.8941
APPL1	-6.94529	28.601	-6.32894	5.68e-10	2.33e-08	11.8881
IKBIP	-1.50267	6.54767	-6.32881	5.69e-10	2.33e-08	11.8873
FCGR2A	-2.18346	5.8935	-6.3288	5.69e-10	2.33e-08	11.8872
HEATR1	-3.30269	10.8543	-6.32834	5.71e-10	2.33e-08	11.8845
LACTB	-3.5002	15.3204	-6.32438	5.84e-10	2.38e-08	11.8615
THY1	-5.99966	14.1239	-6.3242	5.85e-10	2.38e-08	11.8605
NDUFAF7	-1.25887	8.72744	-6.32419	5.85e-10	2.38e-08	11.8604
TRIM32	-3.41269	14.0765	-6.32413	5.85e-10	2.38e-08	11.86
CTBP1	-8.97274	63.0267	-6.32404	5.85e-10	2.38e-08	11.8595
MSR1	-1.70041	3.7257	-6.32059	5.98e-10	2.43e-08	11.8395
NCAPH	-2.03074	2.92506	-6.31795	6.07e-10	2.46e-08	11.8241
CREG1	-18.8958	110.775	-6.31649	6.12e-10	2.48e-08	11.8156
AC118549.1	-3.42886	16.4105	-6.31495	6.18e-10	2.5e-08	11.8066
MACROH2A2	-20.5191	60.1696	-6.31272	6.26e-10	2.53e-08	11.7937
LARS1	-10.7504	57.3979	-6.31202	6.29e-10	2.54e-08	11.7896
CELF1	-5.95023	35.4387	-6.30979	6.37e-10	2.57e-08	11.7767
SNAP29	-3.97301	29.2176	-6.30968	6.38e-10	2.57e-08	11.776
TGFB1	-9.55923	31.5374	-6.30699	6.48e-10	2.61e-08	11.7604
MEX3C	-2.97252	12.7973	-6.30697	6.48e-10	2.61e-08	11.7603
HADHB	-20.2076	115.855	-6.30369	6.61e-10	2.66e-08	11.7413
AURKA	-2.22964	4.45123	-6.30183	6.68e-10	2.69e-08	11.7305
ASCC3	-3.83655	12.4362	-6.30154	6.69e-10	2.69e-08	11.7288
PTPRG	-2.60655	8.25875	-6.29946	6.78e-10	2.72e-08	11.7167
RAB12	-5.49291	26.838	-6.29872	6.81e-10	2.73e-08	11.7124
PDSS1	-1.33154	7.10184	-6.2981	6.83e-10	2.74e-08	11.7088
ZNF35	-1.35052	7.19219	-6.29809	6.83e-10	2.74e-08	11.7087
MBIP	-3.36959	16.062	-6.29582	6.93e-10	2.77e-08	11.6956
EIF2B2	-1.94707	15.1345	-6.29418	6.99e-10	2.8e-08	11.6861
POLD3	-1.49197	7.86554	-6.29378	7.01e-10	2.8e-08	11.6837
CEP170	-1.35573	4.54763	-6.29198	7.09e-10	2.83e-08	11.6734
ALDH1B1	-16.8311	69.2332	-6.2918	7.09e-10	2.83e-08	11.6723
GTF2H1	-2.74699	17.3309	-6.2913	7.12e-10	2.84e-08	11.6694
EMC1	-5.48986	24.6566	-6.29035	7.16e-10	2.85e-08	11.6639
POLR3F	-1.79255	12.2226	-6.28986	7.18e-10	2.86e-08	11.6611
C1orf198	-6.7515	36.8963	-6.28853	7.23e-10	2.88e-08	11.6533
CLCC1	-5.00578	23.8908	-6.28774	7.27e-10	2.89e-08	11.6488
RBM7	-2.63344	10.0281	-6.28735	7.28e-10	2.9e-08	11.6465
MTIF2	-5.39287	33.5131	-6.28684	7.31e-10	2.9e-08	11.6436
TDP1	-1.58551	8.24579	-6.2866	7.32e-10	2.91e-08	11.6422
C14orf119	-3.56674	35.2897	-6.28561	7.36e-10	2.92e-08	11.6365
SOX12	-6.49803	29.7151	-6.28406	7.43e-10	2.95e-08	11.6275
DEK	-14.5305	66.0515	-6.28384	7.44e-10	2.95e-08	11.6262
CRLF3	-1.78466	8.0558	-6.28225	7.51e-10	2.97e-08	11.617
TIMM21	-1.48458	9.85976	-6.27974	7.62e-10	3.02e-08	11.6025
PEBP4	50.7524	74.0579	6.27887	7.66e-10	3.03e-08	11.5975
ANP32B	-33.5667	236.526	-6.27872	7.67e-10	3.03e-08	11.5966
TBC1D9B	-10.3069	52.3898	-6.2787	7.67e-10	3.03e-08	11.5965
MGP	-219.873	521.639	-6.2765	7.77e-10	3.06e-08	11.5837
ATP1B3	-20.9932	96.1255	-6.27543	7.82e-10	3.08e-08	11.5775
BTF3L4P2	-2.42552	9.71305	-6.27354	7.91e-10	3.11e-08	11.5666
ISG20L2	-5.04183	27.3648	-6.27169	7.99e-10	3.14e-08	11.5559
PCGF6	-1.42823	7.39759	-6.27106	8.02e-10	3.15e-08	11.5523
KLF13	-6.2879	18.0809	-6.27065	8.04e-10	3.15e-08	11.5499
CHST14	-5.33528	31.5263	-6.27025	8.06e-10	3.16e-08	11.5476
XPR1	-2.81339	12.2316	-6.27015	8.07e-10	3.16e-08	11.547
CLCN2	-1.56636	6.7657	-6.26818	8.16e-10	3.19e-08	11.5356
CDK2	-3.72642	19.9302	-6.26521	8.31e-10	3.25e-08	11.5185
SH3D19	-7.39262	29.8072	-6.26505	8.32e-10	3.25e-08	11.5176
PGK1	-41.3602	150.915	-6.26489	8.32e-10	3.25e-08	11.5166
LRP1	-14.7075	39.9094	-6.26443	8.35e-10	3.26e-08	11.514
TMOD3	-4.22949	18.6885	-6.26393	8.37e-10	3.26e-08	11.5111
PCCB	-7.4122	27.5054	-6.2635	8.39e-10	3.27e-08	11.5086
LRRC20	-2.99308	11.0394	-6.26302	8.42e-10	3.28e-08	11.5059
MECR	-2.03677	15.4961	-6.26279	8.43e-10	3.28e-08	11.5045
RYK	-4.62976	25.6133	-6.26271	8.43e-10	3.28e-08	11.5041
IFNGR2	-24.7043	129.147	-6.2627	8.43e-10	3.28e-08	11.504
RAPGEF5	-1.36332	4.28588	-6.26161	8.49e-10	3.3e-08	11.4977
TM2D3	-1.45273	10.8684	-6.25941	8.6e-10	3.33e-08	11.485
ARF6	-34.1378	171.523	-6.25689	8.73e-10	3.38e-08	11.4705
TAF6	-4.56063	26.2935	-6.25496	8.83e-10	3.42e-08	11.4594
DPP9	-2.48291	17.5592	-6.25426	8.87e-10	3.43e-08	11.4553
MRPL13	-4.21882	22.4939	-6.25377	8.89e-10	3.44e-08	11.4525
GNB1	-33.56	207.896	-6.25345	8.91e-10	3.44e-08	11.4506
GFM2	-5.40476	23.6121	-6.25092	9.04e-10	3.49e-08	11.4361
ELP4	-2.53853	15.62	-6.25043	9.07e-10	3.5e-08	11.4332
ENTR1	-6.56698	38.1383	-6.24915	9.14e-10	3.52e-08	11.4259
EHD4	-4.03456	19.8323	-6.24855	9.17e-10	3.53e-08	11.4224
RPS18	-716.12	3502.97	-6.24805	9.2e-10	3.54e-08	11.4195
MFAP4	-71.7396	164.455	-6.24773	9.21e-10	3.54e-08	11.4177
DDX55	-2.05717	11.0989	-6.24568	9.33e-10	3.58e-08	11.4059
CDC5L	-4.9377	28.5388	-6.24361	9.44e-10	3.62e-08	11.394
ASF1B	-4.33153	7.32948	-6.24204	9.53e-10	3.66e-08	11.3849
COL4A2	-39.3987	111.352	-6.23814	9.75e-10	3.74e-08	11.3625
CLPB	-2.5735	10.0651	-6.23738	9.8e-10	3.75e-08	11.3581
CSTF3	-3.44081	21.0769	-6.23698	9.82e-10	3.76e-08	11.3558
GID8	-9.68371	65.945	-6.2362	9.86e-10	3.77e-08	11.3513
NUP37	-2.67951	15.1044	-6.23494	9.94e-10	3.8e-08	11.3441
APMAP	-42.0208	225.377	-6.23463	9.96e-10	3.8e-08	11.3423
TOMM20	-46.3734	255.805	-6.23463	9.96e-10	3.8e-08	11.3423
NSUN4	-1.77404	10.659	-6.22615	1.05e-09	3.98e-08	11.2936
SNRPE	-16.3768	93.4544	-6.22605	1.05e-09	3.98e-08	11.293
YTHDF1	-9.09157	64.6316	-6.22551	1.05e-09	3.99e-08	11.2899
SMC3	-9.04552	38.5453	-6.22217	1.07e-09	4.07e-08	11.2707
SDCBP	-19.6546	93.2081	-6.22054	1.08e-09	4.11e-08	11.2613
PSMB5	-32.7217	221.337	-6.22012	1.08e-09	4.11e-08	11.259
ELOC	-5.1825	26.3402	-6.2182	1.1e-09	4.16e-08	11.2479
IMP4	-6.67236	49.4194	-6.21773	1.1e-09	4.17e-08	11.2452
RPP14	-1.01716	7.66365	-6.21756	1.1e-09	4.17e-08	11.2443
EIF3A	-31.6061	131.33	-6.21684	1.11e-09	4.18e-08	11.2401
PSMC2	-12.3276	76.2223	-6.21582	1.11e-09	4.21e-08	11.2343
FUBP1	-10.3099	49.8564	-6.21518	1.12e-09	4.22e-08	11.2306
TAF4B	-1.4906	4.60382	-6.21301	1.13e-09	4.27e-08	11.2181
MSANTD4	-1.8604	7.70895	-6.21128	1.14e-09	4.31e-08	11.2082
ITGB1	-34.2572	115.743	-6.20983	1.15e-09	4.34e-08	11.2
UTP6	-2.89595	21.8418	-6.20918	1.16e-09	4.36e-08	11.1962
ARHGDIB	-46.5438	114.374	-6.20834	1.16e-09	4.37e-08	11.1914
DHX30	-6.03723	45.1406	-6.20597	1.18e-09	4.43e-08	11.1778
ZUP1	-1.58832	9.01557	-6.20466	1.19e-09	4.46e-08	11.1703
RCHY1	-2.46353	13.0835	-6.20271	1.2e-09	4.51e-08	11.1591
SRPX2	-2.10246	4.74297	-6.20118	1.21e-09	4.55e-08	11.1504
PMPCA	-5.00768	34.2055	-6.19941	1.23e-09	4.59e-08	11.1402
TRUB1	-6.00289	22.7659	-6.19904	1.23e-09	4.6e-08	11.1382
ARAP3	-2.14074	6.22177	-6.19822	1.23e-09	4.62e-08	11.1335
YIPF2	-12.7179	80.2011	-6.19808	1.23e-09	4.62e-08	11.1326
TAB1	-3.61664	32.6176	-6.19793	1.24e-09	4.62e-08	11.1318
PKP4	-5.09985	27.1262	-6.19702	1.24e-09	4.64e-08	11.1266
CD276	-25.4253	82.4502	-6.19669	1.25e-09	4.65e-08	11.1247
MSH6	-2.99729	14.4303	-6.19633	1.25e-09	4.66e-08	11.1226
PLXND1	-4.35071	13.892	-6.19587	1.25e-09	4.66e-08	11.12
ALDH18A1	-21.4991	106.083	-6.19552	1.25e-09	4.67e-08	11.118
ACAD9	-5.19718	37.3563	-6.19545	1.25e-09	4.67e-08	11.1176
SH3BGRL3	-33.7764	182.063	-6.19429	1.26e-09	4.7e-08	11.111
GSK3A	-7.80395	61.8839	-6.19371	1.27e-09	4.71e-08	11.1077
RPS6KB1	-3.71735	17.2419	-6.19263	1.28e-09	4.74e-08	11.1015
PRMT6	-11.8046	46.1816	-6.19261	1.28e-09	4.74e-08	11.1014
LSG1	-4.58565	26.635	-6.19249	1.28e-09	4.74e-08	11.1007
ZNF317	-3.0194	19.4515	-6.19204	1.28e-09	4.74e-08	11.0981
DPP3	-8.38894	44.9782	-6.19093	1.29e-09	4.77e-08	11.0918
PXK	-1.84242	8.51927	-6.19026	1.29e-09	4.79e-08	11.0879
ZNF92	-2.26545	9.13541	-6.19022	1.29e-09	4.79e-08	11.0877
RRS1	-13.3086	52.7481	-6.18843	1.31e-09	4.83e-08	11.0775
PRKAG2	-5.23964	23.8915	-6.18828	1.31e-09	4.83e-08	11.0766
METTL5	-4.12632	28.1279	-6.18801	1.31e-09	4.84e-08	11.0751
CCDC91	-1.89886	10.0681	-6.18582	1.33e-09	4.89e-08	11.0626
PPHLN1	-1.26302	9.69008	-6.18542	1.33e-09	4.9e-08	11.0603
GFM1	-4.27529	18.0046	-6.18539	1.33e-09	4.9e-08	11.0601
SMC2	-3.09511	9.31272	-6.18403	1.34e-09	4.93e-08	11.0523
RAB21	-2.7131	15.8321	-6.18257	1.35e-09	4.97e-08	11.044
C11orf24	-5.70708	37.3699	-6.18118	1.36e-09	5.01e-08	11.0361
PHTF1	-1.0864	5.14078	-6.18107	1.36e-09	5.01e-08	11.0354
PFAS	-3.55221	13.9575	-6.17961	1.38e-09	5.05e-08	11.0271
TNPO3	-6.64377	38.3433	-6.17878	1.38e-09	5.07e-08	11.0224
CHPF2	-10.9352	61.9174	-6.17833	1.39e-09	5.08e-08	11.0198
CIAPIN1	-5.50841	33.5231	-6.17654	1.4e-09	5.13e-08	11.0096
BAZ1A	-4.49426	18.5449	-6.17585	1.41e-09	5.15e-08	11.0057
VPS35L	-2.90301	15.9182	-6.17443	1.42e-09	5.19e-08	10.9975
SNX2	-8.04892	49.364	-6.16465	1.5e-09	5.49e-08	10.9418
INPPL1	-11.4744	69.9727	-6.16447	1.5e-09	5.49e-08	10.9408
TMEM123	-64.1506	228.563	-6.16309	1.52e-09	5.52e-08	10.9329
PRDX2	-65.6893	405.788	-6.16303	1.52e-09	5.52e-08	10.9326
NCK1	-7.25025	25.9027	-6.16272	1.52e-09	5.53e-08	10.9308
LYN	-4.22325	15.3191	-6.16223	1.52e-09	5.54e-08	10.9281
COX7A2L	-9.43735	71.58	-6.16182	1.53e-09	5.55e-08	10.9257
SAFB	-5.66056	47.4573	-6.15979	1.55e-09	5.6e-08	10.9142
MRPS28	-5.45948	26.149	-6.15972	1.55e-09	5.6e-08	10.9138
SAAL1	-3.07847	14.1673	-6.15971	1.55e-09	5.6e-08	10.9137
ZW10	-3.77155	19.3653	-6.15969	1.55e-09	5.6e-08	10.9136
CANX	-118.884	522.872	-6.1596	1.55e-09	5.6e-08	10.9131
FCGR3A	-6.35029	14.6754	-6.1572	1.57e-09	5.68e-08	10.8994
EXOC5	-3.37689	14.1979	-6.15707	1.57e-09	5.68e-08	10.8987
IGFBP7	-168.889	525.327	-6.15695	1.57e-09	5.68e-08	10.898
RBM22	-4.79222	38.8144	-6.15649	1.58e-09	5.69e-08	10.8954
TMEM70	-4.86648	24.6667	-6.15634	1.58e-09	5.69e-08	10.8945
LRRC47	-5.62078	54.0486	-6.15634	1.58e-09	5.69e-08	10.8945
TMEM165	-5.35858	33.4371	-6.15565	1.58e-09	5.71e-08	10.8906
UACA	-3.2047	14.7313	-6.15451	1.59e-09	5.74e-08	10.8841
SF3B6	-20.2853	151.599	-6.15444	1.6e-09	5.74e-08	10.8837
PLK1	-2.05069	3.27495	-6.15316	1.61e-09	5.78e-08	10.8764
ORAI2	-2.77644	10.0099	-6.15266	1.61e-09	5.79e-08	10.8736
AC005288.1	-7.54445	36.3971	-6.1511	1.63e-09	5.84e-08	10.8647
SLC25A15	-3.33026	9.67698	-6.1508	1.63e-09	5.84e-08	10.863
IWS1	-6.42544	41.3425	-6.15006	1.64e-09	5.86e-08	10.8588
RBMX2	-3.25264	26.2302	-6.14853	1.65e-09	5.91e-08	10.8501
MPRIP	-4.00528	21.2225	-6.14819	1.65e-09	5.92e-08	10.8482
RAB6B	-3.90766	10.5291	-6.14676	1.67e-09	5.97e-08	10.8401
CSNK1E	-10.7119	68.1419	-6.14664	1.67e-09	5.97e-08	10.8394
PGAM1	-5.91909	30.9878	-6.14418	1.69e-09	6.04e-08	10.8254
TWF1	-11.6394	49.423	-6.14411	1.69e-09	6.04e-08	10.825
MRPS7	-8.06473	58.1813	-6.14371	1.7e-09	6.05e-08	10.8227
VEZT	-4.7204	22.4622	-6.14192	1.72e-09	6.11e-08	10.8126
PPP4R3B	-8.27961	41.5054	-6.14047	1.73e-09	6.16e-08	10.8044
ZNF669	-1.6507	6.28147	-6.14015	1.73e-09	6.16e-08	10.8025
SMC4	-2.24564	5.2776	-6.1396	1.74e-09	6.18e-08	10.7994
FAM3C	-5.08594	26.5012	-6.13709	1.77e-09	6.26e-08	10.7851
UHRF1	-1.42321	2.10482	-6.13627	1.77e-09	6.29e-08	10.7805
AC002044.1	1.24387	1.53079	6.1361	1.78e-09	6.29e-08	10.7795
GNPAT	-9.2216	63.2068	-6.1346	1.79e-09	6.34e-08	10.771
PHRF1	-5.36738	33.5669	-6.13455	1.79e-09	6.34e-08	10.7708
VDR	-1.22253	3.20089	-6.1278	1.86e-09	6.58e-08	10.7325
SKA2	-4.09572	23.2262	-6.12759	1.87e-09	6.59e-08	10.7313
IRAK1	-27.5582	135.442	-6.12545	1.89e-09	6.66e-08	10.7192
AC104083.1	-20.5024	63.7891	-6.12475	1.9e-09	6.69e-08	10.7152
NFKB1	-7.04545	30.5946	-6.12447	1.9e-09	6.69e-08	10.7137
ARL15	-6.12963	25.0411	-6.12433	1.9e-09	6.69e-08	10.7129
FUS	-12.6327	72.5441	-6.12342	1.91e-09	6.73e-08	10.7077
ZNF48	-1.9838	13.4373	-6.1231	1.92e-09	6.73e-08	10.7059
AC245060.4	-2.25094	13.1316	-6.12193	1.93e-09	6.78e-08	10.6993
ARHGAP11A	-1.16091	2.3531	-6.12126	1.94e-09	6.8e-08	10.6954
TASOR	-4.64936	19.8968	-6.12028	1.95e-09	6.83e-08	10.6899
CAMLG	-10.7434	74.985	-6.12017	1.95e-09	6.83e-08	10.6893
USP1	-6.36928	29.7267	-6.11795	1.97e-09	6.92e-08	10.6768
FGF13	-1.85908	6.39036	-6.11667	1.99e-09	6.96e-08	10.6695
TMPO	-4.90721	19.1623	-6.11663	1.99e-09	6.96e-08	10.6693
ICE2	-2.04475	9.59913	-6.11604	2e-09	6.98e-08	10.6659
VMA21	-3.52338	25.3302	-6.11476	2.01e-09	7.02e-08	10.6587
FKBP9	-10.3404	49.7701	-6.11465	2.01e-09	7.02e-08	10.6581
CSNK2A1	-9.31557	52.1802	-6.1086	2.08e-09	7.26e-08	10.6239
ZFP62	-4.52788	24.7604	-6.10833	2.09e-09	7.27e-08	10.6224
CUL1	-7.68629	57.6214	-6.1058	2.12e-09	7.37e-08	10.6081
CCNA2	-3.25537	5.34865	-6.1019	2.17e-09	7.51e-08	10.586
CDC6	-1.78365	3.42254	-6.10149	2.17e-09	7.53e-08	10.5837
GFOD2	-3.29208	14.9422	-6.09953	2.2e-09	7.61e-08	10.5727
GALNT1	-15.597	67.4059	-6.09936	2.2e-09	7.61e-08	10.5717
RSU1	-6.88891	37.1964	-6.09866	2.21e-09	7.64e-08	10.5677
STK25	-5.47327	43.213	-6.09861	2.21e-09	7.64e-08	10.5675
CRCP	-7.47093	47.0865	-6.09739	2.22e-09	7.68e-08	10.5606
FAM3C2	-1.78068	6.42889	-6.0955	2.25e-09	7.75e-08	10.5499
ZCCHC10	-2.18355	14.4473	-6.09511	2.25e-09	7.77e-08	10.5477
SHCBP1	-1.03623	1.44747	-6.09102	2.31e-09	7.95e-08	10.5247
DCAF5	-5.2072	27.414	-6.08933	2.33e-09	8.02e-08	10.5151
PPP2CA	-10.4244	78.143	-6.08889	2.34e-09	8.03e-08	10.5127
MDH1	-9.8925	75.2489	-6.08802	2.35e-09	8.06e-08	10.5077
NDUFA12	-7.10537	61.8728	-6.08776	2.35e-09	8.07e-08	10.5063
SLC12A7	-9.63616	45.7975	-6.08764	2.35e-09	8.07e-08	10.5056
NIF3L1	-4.50148	31.2667	-6.08621	2.37e-09	8.13e-08	10.4975
TOMM40L	-2.58373	13.0124	-6.0856	2.38e-09	8.16e-08	10.4941
KIF2C	-1.89545	3.37648	-6.08517	2.39e-09	8.17e-08	10.4917
ADNP	-12.2465	59.5433	-6.08462	2.39e-09	8.19e-08	10.4886
MS4A6A	-3.33118	9.2024	-6.08171	2.44e-09	8.32e-08	10.4722
TINF2	-10.2819	74.1234	-6.08071	2.45e-09	8.36e-08	10.4665
KLHL7	-3.24581	16.2846	-6.08044	2.45e-09	8.37e-08	10.465
RNGTT	-2.98244	11.4449	-6.07971	2.46e-09	8.39e-08	10.461
NOP2	-4.60403	24.8907	-6.07802	2.49e-09	8.46e-08	10.4514
GNL3	-26.8601	142.634	-6.07798	2.49e-09	8.46e-08	10.4512
PXYLP1	-2.2858	11.7019	-6.07765	2.49e-09	8.47e-08	10.4493
GTF3C3	-2.55312	11.8283	-6.07672	2.51e-09	8.51e-08	10.4441
RTF2	-7.42455	72.951	-6.07618	2.51e-09	8.53e-08	10.4411
FUBP3	-7.66763	38.9542	-6.07492	2.53e-09	8.58e-08	10.434
MTPAP	-1.41411	8.75301	-6.07267	2.57e-09	8.69e-08	10.4213
KDM4A	-7.29636	36.404	-6.06957	2.61e-09	8.84e-08	10.4039
CDKN3	-2.28066	3.93489	-6.06938	2.62e-09	8.84e-08	10.4028
RITA1	-6.21655	42.5253	-6.06896	2.62e-09	8.86e-08	10.4005
DNM2	-4.96621	33.3109	-6.0682	2.63e-09	8.89e-08	10.3962
ARPP19	-9.38311	50.19	-6.06794	2.64e-09	8.9e-08	10.3947
ZNF496	-2.25309	11.3923	-6.06662	2.66e-09	8.96e-08	10.3874
GRB2	-12.5122	98.8869	-6.06657	2.66e-09	8.96e-08	10.387
IPO13	-4.96331	35.0263	-6.06648	2.66e-09	8.96e-08	10.3866
BRCC3	-5.94313	31.2294	-6.06564	2.67e-09	8.99e-08	10.3818
TBCB	-7.01329	52.2341	-6.06375	2.7e-09	9.08e-08	10.3712
YES1	-9.69188	39.9349	-6.06035	2.76e-09	9.25e-08	10.3522
NDE1	-1.72481	7.07178	-6.05957	2.77e-09	9.28e-08	10.3478
FMNL3	-1.29977	4.00906	-6.0595	2.77e-09	9.28e-08	10.3474
GTPBP10	-1.54564	7.51959	-6.05948	2.77e-09	9.28e-08	10.3472
EAPP	-8.82206	66.4101	-6.05851	2.78e-09	9.32e-08	10.3418
SMARCD2	-17.3222	136.328	-6.05488	2.84e-09	9.51e-08	10.3214
ENPP1	-1.93916	7.13218	-6.05399	2.86e-09	9.56e-08	10.3164
CFI	-3.79308	10.0373	-6.05337	2.87e-09	9.58e-08	10.313
LRRC40	-3.8133	16.4341	-6.05122	2.9e-09	9.69e-08	10.3009
ANXA7	-26.9748	166.237	-6.05019	2.92e-09	9.74e-08	10.2951
MAGOH	-6.41032	46.4527	-6.04993	2.93e-09	9.75e-08	10.2937
PAPOLA	-7.56198	44.3512	-6.04989	2.93e-09	9.75e-08	10.2935
EIF4G2	-54.6198	284.788	-6.04969	2.93e-09	9.75e-08	10.2924
NLN	-2.23615	8.71454	-6.04864	2.95e-09	9.81e-08	10.2865
WDR4	-2.13293	10.1806	-6.04835	2.95e-09	9.82e-08	10.2848
NOMO1	-5.23034	26.752	-6.04786	2.96e-09	9.84e-08	10.2821
SUCLG1	-6.8876	55.0598	-6.04755	2.97e-09	9.85e-08	10.2804
PNRC2	-15.5813	102.179	-6.04712	2.97e-09	9.87e-08	10.2779
CDC42SE1	-19.6572	95.2101	-6.04671	2.98e-09	9.89e-08	10.2757
PRRC2A	-32.3599	165.046	-6.04544	3e-09	9.95e-08	10.2685
METTL9	-9.24105	54.4293	-6.04226	3.06e-09	1.01e-07	10.2507
STX18	-1.86466	17.167	-6.04156	3.07e-09	1.02e-07	10.2468
SMARCB1	-11.96	105.227	-6.04145	3.07e-09	1.02e-07	10.2462
DMAC2	-2.99677	27.6002	-6.04143	3.07e-09	1.02e-07	10.2461
KDM5C	-7.33786	41.4231	-6.04074	3.09e-09	1.02e-07	10.2422
C16orf91	-6.7613	33.9716	-6.04065	3.09e-09	1.02e-07	10.2417
GPBP1L1	-8.84547	56.6525	-6.03877	3.12e-09	1.03e-07	10.2312
CABLES1	-1.18705	4.11418	-6.03821	3.13e-09	1.03e-07	10.2281
TSR1	-4.53454	22.9514	-6.03584	3.17e-09	1.04e-07	10.2148
NUP188	-5.2295	28.3893	-6.03574	3.18e-09	1.04e-07	10.2143
MYBL2	-6.72267	8.60598	-6.0338	3.21e-09	1.06e-07	10.2034
RNF40	-7.46508	37.9141	-6.03067	3.27e-09	1.07e-07	10.1859
MGRN1	-4.32531	31.4505	-6.03055	3.27e-09	1.07e-07	10.1852
PLXDC1	-1.07831	3.24732	-6.02979	3.29e-09	1.08e-07	10.181
NOL9	-1.62467	11.0589	-6.02938	3.29e-09	1.08e-07	10.1787
THAP11	-4.92242	34.671	-6.02938	3.29e-09	1.08e-07	10.1787
ATP6V1A	-13.6252	58.6448	-6.02896	3.3e-09	1.08e-07	10.1763
CMTM3	-5.7936	21.5914	-6.02848	3.31e-09	1.08e-07	10.1737
OXSR1	-5.33835	29.6146	-6.02703	3.34e-09	1.09e-07	10.1655
ZNF641	-1.64843	8.12009	-6.02459	3.39e-09	1.11e-07	10.1519
MAPK6	-8.95881	28.6284	-6.0214	3.45e-09	1.13e-07	10.1341
STARD7	-15.0181	109.65	-6.02133	3.45e-09	1.13e-07	10.1338
FNDC3B	-4.09133	14.247	-6.02067	3.46e-09	1.13e-07	10.13
TBX1	-7.64054	18.7426	-6.02047	3.47e-09	1.13e-07	10.129
PCNT	-2.04267	9.72489	-6.01876	3.5e-09	1.14e-07	10.1194
POLR1D	-6.63298	50.3001	-6.01848	3.51e-09	1.14e-07	10.1178
ANKLE2	-1.59858	11.6699	-6.0183	3.51e-09	1.14e-07	10.1168
VCP	-44.399	283.44	-6.01829	3.51e-09	1.14e-07	10.1168
EGLN1	-4.88634	23.4817	-6.0172	3.53e-09	1.15e-07	10.1107
WASHC5	-9.47175	37.9885	-6.01717	3.53e-09	1.15e-07	10.1105
EPB41	-7.70057	29.2907	-6.01472	3.58e-09	1.16e-07	10.0968
HAUS1	-2.59008	15.2083	-6.01447	3.59e-09	1.16e-07	10.0955
NSMCE2	-3.24409	18.1359	-6.013	3.62e-09	1.17e-07	10.0872
UBE3C	-7.50028	34.0141	-6.01286	3.62e-09	1.17e-07	10.0865
DCUN1D1	-3.2173	13.0337	-6.00977	3.69e-09	1.19e-07	10.0693
PPP2R5C	-3.13327	21.6832	-6.00826	3.72e-09	1.2e-07	10.0609
ATF1	-5.2579	24.1052	-6.00628	3.76e-09	1.21e-07	10.0498
PEX5	-4.09532	26.8638	-6.00627	3.76e-09	1.21e-07	10.0498
AFAP1	-2.9978	12.4759	-6.00391	3.81e-09	1.23e-07	10.0366
HDAC7	-3.63616	23.6907	-6.00247	3.84e-09	1.24e-07	10.0286
ZFR	-9.30899	44.2426	-6.00104	3.88e-09	1.25e-07	10.0206
LYSMD1	-1.85414	11.1946	-5.99925	3.92e-09	1.26e-07	10.0107
MAD2L1BP	-3.86431	32.8705	-5.99805	3.94e-09	1.27e-07	10.004
HIF1A	-24.7324	83.1954	-5.99702	3.97e-09	1.28e-07	9.99829
C12orf49	-3.13829	11.3763	-5.99684	3.97e-09	1.28e-07	9.99727
MOB1A	-9.25179	48.2915	-5.99675	3.97e-09	1.28e-07	9.99679
SLC39A1	-17.2336	119.09	-5.99659	3.98e-09	1.28e-07	9.99591
RAB5C	-13.4545	91.6594	-5.99604	3.99e-09	1.28e-07	9.9928
KARS1	-14.5403	99.5438	-5.99566	4e-09	1.28e-07	9.99071
DDX20	-1.35855	8.29854	-5.99547	4e-09	1.28e-07	9.98966
CCNB2	-4.02425	8.19475	-5.99405	4.03e-09	1.29e-07	9.98173
SPG21	-13.6085	88.9677	-5.9939	4.04e-09	1.29e-07	9.98092
AGO2	-2.87388	9.10383	-5.99371	4.04e-09	1.29e-07	9.97985
GUF1	-4.73053	25.4824	-5.99233	4.07e-09	1.3e-07	9.97219
MRPS35	-19.5818	116.118	-5.99224	4.08e-09	1.3e-07	9.9717
C1S	-35.1459	92.7715	-5.99165	4.09e-09	1.31e-07	9.96841
ASPN	-9.50272	18.4144	-5.99122	4.1e-09	1.31e-07	9.96604
PATL1	-5.18333	23.1633	-5.98903	4.15e-09	1.32e-07	9.95386
VDAC3	-12.4849	67.4152	-5.98867	4.16e-09	1.33e-07	9.95188
NBL1	56.9761	128.72	5.98847	4.16e-09	1.33e-07	9.95076
WDR76	-1.05231	3.28512	-5.98834	4.17e-09	1.33e-07	9.95004
MOCS3	-1.31275	7.54147	-5.98775	4.18e-09	1.33e-07	9.94676
ATP2A2	-14.6529	62.4589	-5.98763	4.18e-09	1.33e-07	9.94606
HAUS2	-1.8246	10.1795	-5.98729	4.19e-09	1.33e-07	9.94422
MCTS1	-4.46403	31.3413	-5.98663	4.21e-09	1.34e-07	9.94053
AC015908.3	2.92905	6.29836	5.98607	4.22e-09	1.34e-07	9.93742
MGME1	-3.81578	21.8048	-5.98553	4.23e-09	1.34e-07	9.93445
ANXA5	-84.0566	414.339	-5.98499	4.25e-09	1.35e-07	9.93144
FAM171A1	-14.9811	56.178	-5.98446	4.26e-09	1.35e-07	9.92849
SNUPN	-1.94837	15.852	-5.98384	4.28e-09	1.35e-07	9.92504
DTD2	-3.80851	20.4423	-5.98216	4.32e-09	1.37e-07	9.91573
UBQLN1	-12.6642	68.8781	-5.98189	4.32e-09	1.37e-07	9.9142
TUBG1	-8.85149	52.5911	-5.98184	4.32e-09	1.37e-07	9.91396
OR7E14P	-1.25883	5.42784	-5.98174	4.33e-09	1.37e-07	9.91338
PRIMPOL	-1.98713	10.9628	-5.98112	4.34e-09	1.37e-07	9.90993
RBM14	-5.77667	44.3438	-5.97752	4.43e-09	1.4e-07	9.88996
MLXIP	-4.98717	21.5667	-5.97547	4.49e-09	1.41e-07	9.87858
TXNDC9	-4.51524	26.7825	-5.97458	4.51e-09	1.42e-07	9.87365
COX10	-2.01225	12.8762	-5.97437	4.51e-09	1.42e-07	9.87249
DENND4B	-3.17892	15.2044	-5.97421	4.52e-09	1.42e-07	9.87159
RAP1B	-1.17546	5.86183	-5.97363	4.53e-09	1.42e-07	9.8684
PGM2	-6.79931	25.9358	-5.97341	4.54e-09	1.43e-07	9.86719
ARPC3	-25.9811	187.97	-5.97226	4.57e-09	1.43e-07	9.86083
RBAK	-2.05088	9.54789	-5.97168	4.58e-09	1.44e-07	9.85758
ADO	-5.14042	29.7586	-5.97035	4.62e-09	1.45e-07	9.85022
MTHFD2	-8.12115	35.0398	-5.97023	4.62e-09	1.45e-07	9.84957
AHCYL1	-15.7393	89.5434	-5.96994	4.63e-09	1.45e-07	9.84795
SIRT5	-1.15827	8.98499	-5.96948	4.64e-09	1.45e-07	9.84539
CDH13	-1.12141	3.54515	-5.96875	4.66e-09	1.46e-07	9.84136
KBTBD2	-3.918	21.9937	-5.96636	4.72e-09	1.48e-07	9.82814
CNP	-11.7667	70.9332	-5.96535	4.75e-09	1.48e-07	9.82254
ZNF227	-1.79398	10.8062	-5.96516	4.76e-09	1.48e-07	9.82145
LSM12P1	-1.63055	5.84944	-5.96438	4.78e-09	1.49e-07	9.81714
A2M	-142.462	324.82	-5.96165	4.85e-09	1.51e-07	9.80201
AP3D1	-13.1022	77.4065	-5.96075	4.88e-09	1.52e-07	9.79708
BAP1	-6.71206	57.4089	-5.95954	4.91e-09	1.53e-07	9.79036
RHBDF2	-1.43039	4.98666	-5.95889	4.93e-09	1.53e-07	9.78675
TNPO2	-6.78765	44.0308	-5.95881	4.93e-09	1.53e-07	9.78634
MS4A4A	-2.42284	6.29838	-5.95871	4.93e-09	1.53e-07	9.7858
NUS1	-5.55239	24.3787	-5.95824	4.95e-09	1.54e-07	9.78317
NSD2	-1.9721	8.45354	-5.95787	4.96e-09	1.54e-07	9.78115
CLPX	-5.54268	31.149	-5.95753	4.97e-09	1.54e-07	9.77927
TOR3A	-5.28466	36.8923	-5.95638	5e-09	1.55e-07	9.7729
NINJ2	-1.085	3.02356	-5.95498	5.04e-09	1.56e-07	9.76515
TOP3A	-2.1336	11.7171	-5.95397	5.07e-09	1.57e-07	9.75957
CCAR1	-6.72368	35.4023	-5.95355	5.08e-09	1.57e-07	9.75724
RAI14	-4.22854	14.6171	-5.95335	5.09e-09	1.57e-07	9.75611
CLINT1	-9.54944	44.8525	-5.95316	5.09e-09	1.57e-07	9.7551
ZNHIT3	-1.69835	14.6836	-5.95301	5.1e-09	1.57e-07	9.75423
GUCY2D	1.17673	2.16121	5.95158	5.14e-09	1.58e-07	9.74635
BRD4	-3.88711	25.6908	-5.95154	5.14e-09	1.58e-07	9.74614
RPF2	-7.47656	30.8551	-5.95066	5.17e-09	1.59e-07	9.74127
ANAPC1	-1.19161	4.25725	-5.94929	5.21e-09	1.6e-07	9.7337
STYX	-2.70915	14.5547	-5.9487	5.22e-09	1.61e-07	9.73042
MT-CO1	5523.57	21411.9	5.94825	5.24e-09	1.61e-07	9.72793
TOX3	-3.8239	8.12343	-5.9476	5.26e-09	1.61e-07	9.72434
NFYC	-2.68545	27.3453	-5.9473	5.27e-09	1.62e-07	9.7227
VSIG4	-3.16551	7.81556	-5.94659	5.29e-09	1.62e-07	9.71879
CXorf56	-3.32752	26.2078	-5.94599	5.31e-09	1.63e-07	9.71545
RBM17	-3.22965	29.2158	-5.94485	5.34e-09	1.64e-07	9.70921
PDCD11	-4.46346	23.6543	-5.9447	5.34e-09	1.64e-07	9.70834
ARNT	-4.29088	22.9049	-5.9445	5.35e-09	1.64e-07	9.70723
CCNY	-7.31789	46.6031	-5.94414	5.36e-09	1.64e-07	9.70527
TFB1M	-1.23817	8.20745	-5.94399	5.37e-09	1.64e-07	9.70441
DCAF15	-2.74692	20.065	-5.94394	5.37e-09	1.64e-07	9.70417
PIK3R3	-4.42653	18.3672	-5.94366	5.38e-09	1.64e-07	9.70262
PIGT	-34.7946	182.077	-5.94325	5.39e-09	1.64e-07	9.70033
NRBF2	-3.78566	24.6324	-5.943	5.4e-09	1.64e-07	9.69899
SLC6A8	-7.26509	46.7834	-5.94284	5.4e-09	1.64e-07	9.69811
CARNMT1	-3.22779	15.467	-5.94283	5.4e-09	1.64e-07	9.69804
MYNN	-1.78285	9.58976	-5.94227	5.42e-09	1.65e-07	9.69496
SNRNP200	-15.5536	77.5366	-5.94181	5.43e-09	1.65e-07	9.6924
UBE2J2	-4.56783	35.0489	-5.93999	5.49e-09	1.67e-07	9.68236
METTL23	-4.00039	34.4374	-5.93935	5.51e-09	1.67e-07	9.67882
YEATS2	-3.21772	13.8505	-5.93871	5.53e-09	1.68e-07	9.6753
SMAP2	-8.95814	51.6701	-5.93548	5.63e-09	1.71e-07	9.6575
PRDX1	-58.3688	413.704	-5.93366	5.69e-09	1.73e-07	9.64748
ELOVL1	-20.3058	118.976	-5.93359	5.69e-09	1.73e-07	9.64706
TERF1	-2.16923	10.882	-5.93337	5.7e-09	1.73e-07	9.64587
DDX28	-2.60032	15.5712	-5.93206	5.74e-09	1.74e-07	9.63862
CDCA5	-2.66378	4.86433	-5.93201	5.74e-09	1.74e-07	9.63839
DNAJB11	-5.02825	33.9964	-5.9309	5.78e-09	1.75e-07	9.63227
DYNC1LI1	-3.84956	25.6625	-5.93008	5.81e-09	1.75e-07	9.62771
FANCI	-1.62743	5.27799	-5.93004	5.81e-09	1.75e-07	9.62751
SAMD13	-3.52429	7.61313	-5.9271	5.91e-09	1.78e-07	9.61134
CORO1C	-7.34018	30.3893	-5.9269	5.91e-09	1.78e-07	9.61019
DIS3L	-4.0903	20.6134	-5.92668	5.92e-09	1.78e-07	9.60899
TADA1	-2.59278	14.228	-5.92602	5.94e-09	1.79e-07	9.60539
SMU1	-4.64182	36.8422	-5.92508	5.97e-09	1.8e-07	9.60019
TBCCD1	-1.6539	8.7955	-5.92393	6.01e-09	1.81e-07	9.59388
TSEN15	-5.72451	33.7351	-5.92294	6.05e-09	1.82e-07	9.58843
ZFAT	-1.08604	4.93846	-5.92275	6.05e-09	1.82e-07	9.58739
GCN1	-9.61449	44.7285	-5.92151	6.1e-09	1.83e-07	9.58057
ZNF544	-1.79319	13.1396	-5.91899	6.18e-09	1.86e-07	9.56672
PHF20	-3.90998	22.4295	-5.91879	6.19e-09	1.86e-07	9.5656
AP003559.1	1.66634	5.22606	5.91873	6.19e-09	1.86e-07	9.56527
TIMMDC1	-11.6694	83.6473	-5.91813	6.21e-09	1.86e-07	9.56196
TFAM	-5.95693	27.7536	-5.91758	6.23e-09	1.87e-07	9.55895
ZNF627	-3.33801	17.6029	-5.91729	6.24e-09	1.87e-07	9.55736
APEH	-15.3075	99.2723	-5.91709	6.25e-09	1.87e-07	9.55622
NAA40	-2.06503	11.0489	-5.9162	6.28e-09	1.88e-07	9.55133
PDHX	-4.97903	29.878	-5.91122	6.46e-09	1.93e-07	9.52397
SUN1	-5.51361	29.0536	-5.91021	6.5e-09	1.94e-07	9.5184
BIRC5	-4.2943	6.82176	-5.90965	6.52e-09	1.95e-07	9.51536
TSTA3	-26.8573	111.431	-5.90897	6.54e-09	1.95e-07	9.51161
SMAD1	-1.96111	7.16122	-5.90652	6.64e-09	1.98e-07	9.49816
MRPS16	-14.2859	96.7134	-5.90626	6.65e-09	1.98e-07	9.49677
ESF1	-3.50099	17.5565	-5.90625	6.65e-09	1.98e-07	9.49668
ANPEP	197.409	267.556	5.90613	6.65e-09	1.98e-07	9.49601
ARF3	-21.307	143.494	-5.90604	6.65e-09	1.98e-07	9.49554
HEYL	-7.76367	20.6412	-5.904	6.73e-09	2e-07	9.48433
IRF2BP2	-19.1245	89.6094	-5.90341	6.75e-09	2.01e-07	9.48109
FPR3	-2.9259	6.87943	-5.90288	6.77e-09	2.01e-07	9.47819
MTA1	-5.28369	30.1465	-5.90237	6.79e-09	2.02e-07	9.47541
ADCY3	-2.92921	10.3029	-5.90199	6.81e-09	2.02e-07	9.47331
TAF15	-10.0883	88.6797	-5.90066	6.86e-09	2.03e-07	9.46603
IQGAP3	-1.3134	2.18371	-5.89967	6.9e-09	2.04e-07	9.46057
CC2D2A	-1.88335	7.74059	-5.89902	6.92e-09	2.05e-07	9.45703
RABIF	-3.23477	20.5285	-5.89876	6.93e-09	2.05e-07	9.45561
MTERF3	-5.97172	26.5613	-5.89731	6.99e-09	2.07e-07	9.44764
MAPKAPK2	-9.88687	59.6585	-5.89588	7.05e-09	2.08e-07	9.4398
FBLIM1	-11.0107	53.8885	-5.89435	7.11e-09	2.1e-07	9.43144
NFE2L3	-4.18758	9.66811	-5.89362	7.14e-09	2.1e-07	9.42741
QRICH1	-6.2818	41.7864	-5.89297	7.16e-09	2.11e-07	9.42385
GGT5	-5.30234	17.2751	-5.89204	7.2e-09	2.12e-07	9.41875
MRPL58	-10.5281	69.2325	-5.89182	7.21e-09	2.12e-07	9.41754
SNAPC3	-3.26335	17.1205	-5.88888	7.33e-09	2.15e-07	9.40146
HMGN2	-33.3543	254.611	-5.88824	7.36e-09	2.16e-07	9.39795
PTPN11	-11.0315	49.2614	-5.88796	7.37e-09	2.16e-07	9.39642
ATF7	-3.5223	19.6908	-5.88782	7.38e-09	2.16e-07	9.39565
CIAO2A	-10.7515	57.8556	-5.8867	7.42e-09	2.18e-07	9.38954
E2F4	-5.55916	41.7131	-5.88401	7.54e-09	2.21e-07	9.37481
C16orf72	-1.90747	11.4075	-5.88401	7.54e-09	2.21e-07	9.37477
AC090152.1	-1.03996	2.12418	-5.88349	7.56e-09	2.21e-07	9.37197
LAS1L	-3.77082	28.5222	-5.88214	7.61e-09	2.23e-07	9.36459
ANKEF1	-1.44215	6.7141	-5.88207	7.62e-09	2.23e-07	9.36418
ZNF689	-1.52563	9.23613	-5.88135	7.65e-09	2.24e-07	9.36025
GID4	-2.05279	11.7117	-5.87895	7.75e-09	2.26e-07	9.34714
DNAJA1	-43.6653	232.84	-5.8786	7.77e-09	2.27e-07	9.34521
TBC1D22B	-5.07474	23.0504	-5.87665	7.85e-09	2.29e-07	9.33453
USP7	-9.71702	62.5163	-5.87541	7.91e-09	2.31e-07	9.32778
DENND5A	-3.84398	19.6988	-5.87528	7.91e-09	2.31e-07	9.32708
NPLOC4	-4.3031	32.1268	-5.87423	7.96e-09	2.32e-07	9.32133
CSNK1G2	-7.77437	53.467	-5.87263	8.03e-09	2.34e-07	9.31256
TTF1	-2.65151	17.321	-5.87243	8.04e-09	2.34e-07	9.31148
SFXN1	-2.46492	15.8715	-5.87211	8.06e-09	2.34e-07	9.30972
PECAM1	-9.44047	30.1305	-5.87106	8.11e-09	2.36e-07	9.30398
ATP2B1	-4.7478	17.6131	-5.87028	8.14e-09	2.36e-07	9.29975
MAPRE2	-4.12478	15.5909	-5.86996	8.16e-09	2.37e-07	9.29797
CENPF	-2.23559	3.23339	-5.86991	8.16e-09	2.37e-07	9.29772
THAP4	-10.4332	80.1541	-5.86856	8.22e-09	2.38e-07	9.29033
OSBPL11	-2.32669	10.9884	-5.86612	8.33e-09	2.41e-07	9.27705
TRMT5	-2.08968	13.1035	-5.86557	8.36e-09	2.42e-07	9.27402
DHX40	-4.86431	27.2873	-5.86546	8.36e-09	2.42e-07	9.27345
PRELID1	-8.62028	69.2667	-5.86355	8.46e-09	2.45e-07	9.26299
NPM1P27	-2.97783	10.7272	-5.86304	8.48e-09	2.45e-07	9.26025
DCUN1D5	-6.42438	41.1602	-5.86266	8.5e-09	2.45e-07	9.25818
ZDHHC8	-3.19718	20.1439	-5.86127	8.56e-09	2.47e-07	9.2506
PPP4R2	-6.19445	32.0038	-5.86038	8.61e-09	2.48e-07	9.24574
SH2B3	-2.76174	9.86776	-5.85949	8.65e-09	2.49e-07	9.24088
RNF31	-2.75401	12.5411	-5.85922	8.66e-09	2.5e-07	9.23939
TRA2B	-4.17595	30.2748	-5.8591	8.67e-09	2.5e-07	9.23875
BRD7	-2.82659	20.8094	-5.85889	8.68e-09	2.5e-07	9.23757
COPA	-34.977	165.033	-5.85816	8.72e-09	2.51e-07	9.2336
SKI	-9.73126	53.3597	-5.85713	8.77e-09	2.52e-07	9.228
STRN3	-4.53341	22.9151	-5.85708	8.77e-09	2.52e-07	9.22775
FEN1	-5.72766	26.1795	-5.85674	8.78e-09	2.52e-07	9.22587
ELAC2	-4.56121	35.1425	-5.85596	8.82e-09	2.53e-07	9.22164
PFKL	-11.0325	72.7915	-5.85566	8.84e-09	2.54e-07	9.21998
MSN	-21.3705	75.2392	-5.85506	8.87e-09	2.54e-07	9.21672
HDGFL3	-1.68927	8.63946	-5.85409	8.92e-09	2.56e-07	9.21142
MYL12A	-27.8436	169.719	-5.8513	9.06e-09	2.59e-07	9.19626
SH3KBP1	-2.457	9.31377	-5.84906	9.17e-09	2.62e-07	9.18403
G6PD	-5.54651	35.3559	-5.84846	9.2e-09	2.63e-07	9.18077
LRCH1	-2.83539	12.1009	-5.84519	9.37e-09	2.68e-07	9.16298
NUP133	-4.59217	24.2508	-5.84497	9.38e-09	2.68e-07	9.16178
MMP2	-24.224	67.5087	-5.84449	9.41e-09	2.69e-07	9.15915
NGLY1	-2.5081	14.7839	-5.84368	9.45e-09	2.7e-07	9.15477
NPRL3	-3.47796	26.1068	-5.8434	9.47e-09	2.7e-07	9.15325
RNASEH2A	-4.95218	20.9545	-5.8432	9.48e-09	2.7e-07	9.15217
ANLN	-1.96031	2.8158	-5.84307	9.49e-09	2.7e-07	9.15144
BBS12	-1.03372	4.07813	-5.84279	9.5e-09	2.7e-07	9.14995
MCUB	-1.31406	4.01616	-5.84276	9.5e-09	2.7e-07	9.14976
ENOPH1	-15.0073	88.7581	-5.83939	9.68e-09	2.75e-07	9.13144
INTS4	-1.47563	10.8734	-5.83886	9.71e-09	2.76e-07	9.12857
MMP15	-6.69058	23.5263	-5.83815	9.75e-09	2.77e-07	9.12473
MRPL22	-1.44419	11.8926	-5.83763	9.78e-09	2.77e-07	9.12188
NCSTN	-20.7729	108.988	-5.83637	9.85e-09	2.79e-07	9.11503
MRPL49	-11.9566	81.6303	-5.8361	9.86e-09	2.79e-07	9.11358
CENPO	-1.04517	4.74675	-5.83549	9.9e-09	2.8e-07	9.11027
ARL14EP	-2.66926	18.8721	-5.83533	9.91e-09	2.8e-07	9.10937
SLC25A46	-3.44339	16.632	-5.83483	9.93e-09	2.81e-07	9.10666
CARS1	-2.03397	14.7654	-5.83281	1e-08	2.84e-07	9.09568
TMEM200A	-1.149	2.29239	-5.83202	1.01e-08	2.85e-07	9.09141
KXD1	-4.60967	48.1662	-5.83149	1.01e-08	2.86e-07	9.08853
MT-ND3	4958.22	18554.2	5.83127	1.01e-08	2.86e-07	9.08734
COG1	-3.86385	27.6255	-5.83046	1.02e-08	2.87e-07	9.08292
NIPSNAP3A	-7.51464	33.0873	-5.83032	1.02e-08	2.87e-07	9.08219
SMIM12	-1.01715	7.8552	-5.82847	1.03e-08	2.9e-07	9.07211
SH3BP5	-1.45506	4.69084	-5.82771	1.03e-08	2.91e-07	9.06802
CHCHD4	-4.02155	26.6064	-5.82746	1.04e-08	2.91e-07	9.06665
NAA20	-10.0276	71.4794	-5.82631	1.04e-08	2.93e-07	9.06043
ZPR1	-1.82942	15.5864	-5.82564	1.05e-08	2.94e-07	9.0568
CAPN15	-2.76036	14.625	-5.82535	1.05e-08	2.94e-07	9.0552
EML1	-1.76127	7.14152	-5.82267	1.06e-08	2.98e-07	9.04065
LUM	-82.3688	165.899	-5.82142	1.07e-08	3e-07	9.03391
KIFC1	-3.15694	6.33516	-5.81964	1.08e-08	3.03e-07	9.02424
GLRB	-2.29248	6.1363	-5.81847	1.09e-08	3.05e-07	9.0179
TTC26	-1.37915	5.99068	-5.8184	1.09e-08	3.05e-07	9.01754
ARMT1	-3.56922	19.3556	-5.81834	1.09e-08	3.05e-07	9.01719
MMD	-2.05906	8.3278	-5.81722	1.1e-08	3.06e-07	9.01111
RPL4	-196.718	1109.13	-5.81676	1.1e-08	3.07e-07	9.00863
SQSTM1	-18.1981	98.651	-5.81672	1.1e-08	3.07e-07	9.0084
GMPR2	-6.25799	52.0075	-5.81659	1.1e-08	3.07e-07	9.0077
LRIF1	-3.13839	16.0661	-5.81639	1.1e-08	3.07e-07	9.00665
AAGAB	-6.69518	45.0994	-5.81537	1.11e-08	3.09e-07	9.00112
TOMM70	-9.97663	58.6283	-5.81522	1.11e-08	3.09e-07	9.00027
OLFML2B	-3.70795	8.30446	-5.81225	1.13e-08	3.14e-07	8.98422
TRAPPC6B	-2.71051	19.1749	-5.81148	1.13e-08	3.15e-07	8.98002
SOCS4	-2.0345	9.37163	-5.80959	1.14e-08	3.18e-07	8.9698
PSMG1	-3.64389	20.5078	-5.80853	1.15e-08	3.19e-07	8.96407
NACA	-43.6096	285.39	-5.80835	1.15e-08	3.2e-07	8.9631
RPL6	-117.276	658.078	-5.80787	1.15e-08	3.2e-07	8.96049
ANKS1A	-4.01331	21.7155	-5.80716	1.16e-08	3.21e-07	8.95667
ECD	-5.36054	30.2943	-5.80669	1.16e-08	3.22e-07	8.95411
RAC1	-30.8412	271.164	-5.80661	1.16e-08	3.22e-07	8.95371
WAC	-6.38732	38.9229	-5.80604	1.17e-08	3.23e-07	8.95059
APH1A	-25.4482	182.168	-5.80579	1.17e-08	3.23e-07	8.94928
ZNF229	-1.48151	6.35432	-5.8052	1.17e-08	3.24e-07	8.94605
SUPT7L	-2.65392	20.9022	-5.80459	1.18e-08	3.25e-07	8.94274
NDC80	-1.63371	4.53337	-5.80443	1.18e-08	3.25e-07	8.94192
IARS2	-20.6091	99.1191	-5.80372	1.18e-08	3.26e-07	8.93806
GPR137B	-8.80459	25.9199	-5.80331	1.18e-08	3.27e-07	8.93584
OAT	-20.4344	65.4716	-5.80272	1.19e-08	3.28e-07	8.93264
TBCEL	-2.48154	12.6177	-5.80041	1.2e-08	3.32e-07	8.92019
SMC6	-1.16974	5.63382	-5.79974	1.21e-08	3.33e-07	8.91653
CASK	-2.33935	12.0386	-5.79818	1.22e-08	3.36e-07	8.9081
NUBP1	-3.91293	32.5865	-5.79805	1.22e-08	3.36e-07	8.9074
TIE1	-2.50412	8.96625	-5.79693	1.23e-08	3.38e-07	8.90136
SPAG9	-3.6825	16.5568	-5.79664	1.23e-08	3.38e-07	8.8998
CDC40	-3.05419	11.5743	-5.7966	1.23e-08	3.38e-07	8.8996
CISD2	-4.75272	36.2331	-5.7958	1.24e-08	3.39e-07	8.89525
ADAP2	-1.1683	4.34308	-5.79552	1.24e-08	3.39e-07	8.89373
UQCRFS1	-8.38408	54.9753	-5.79552	1.24e-08	3.39e-07	8.89373
NMD3	-7.00992	36.2069	-5.79521	1.24e-08	3.4e-07	8.89206
USP48	-3.23022	20.5494	-5.79215	1.26e-08	3.45e-07	8.87554
BRD9	-1.41366	10.4877	-5.78915	1.28e-08	3.51e-07	8.85936
SNRPG	-8.13507	53.9973	-5.78902	1.28e-08	3.51e-07	8.85867
HCG18	-1.10544	6.28892	-5.78755	1.29e-08	3.54e-07	8.85074
HDAC3	-4.77198	38.7508	-5.7874	1.29e-08	3.54e-07	8.8499
CCDC113	-1.73623	5.69731	-5.7869	1.3e-08	3.55e-07	8.84721
CYTH3	-8.0812	25.9755	-5.78525	1.31e-08	3.58e-07	8.83833
CSRNP2	-3.18554	17.64	-5.78499	1.31e-08	3.58e-07	8.83695
ENAH	-6.51923	28.2465	-5.78455	1.31e-08	3.59e-07	8.83455
VAT1	-26.925	114.303	-5.78339	1.32e-08	3.61e-07	8.82832
TMEM126B	-4.89943	34.5671	-5.78329	1.32e-08	3.61e-07	8.82779
ERH	-29.8917	203.894	-5.78221	1.33e-08	3.63e-07	8.82195
NMT1	-6.53277	42.8705	-5.78134	1.34e-08	3.64e-07	8.81728
SUPV3L1	-2.66603	18.6073	-5.78088	1.34e-08	3.65e-07	8.81475
MBD2	-6.05226	33.7394	-5.77957	1.35e-08	3.67e-07	8.80769
TESMIN	-2.06239	6.98485	-5.77842	1.36e-08	3.7e-07	8.80155
DONSON	-1.31675	5.6289	-5.77757	1.37e-08	3.71e-07	8.79693
SCAF4	-3.34378	21.2238	-5.77645	1.38e-08	3.73e-07	8.79089
PANX1	-3.32139	16.4967	-5.77639	1.38e-08	3.73e-07	8.79057
GNG12	-12.6022	56.2556	-5.77614	1.38e-08	3.74e-07	8.78923
SFRP2	-32.5127	67.8225	-5.77552	1.38e-08	3.75e-07	8.78588
TRPC4AP	-16.6355	116.384	-5.77511	1.39e-08	3.75e-07	8.78368
API5	-11.4711	64.9316	-5.77491	1.39e-08	3.76e-07	8.78264
DUSP11	-2.70296	18.3692	-5.77469	1.39e-08	3.76e-07	8.78142
ADK	-4.79214	25.6724	-5.77311	1.4e-08	3.79e-07	8.77292
TCF19	-2.72938	11.0068	-5.77307	1.4e-08	3.79e-07	8.7727
SLC9A6	-1.46341	6.67834	-5.77224	1.41e-08	3.8e-07	8.76827
C4A	-6.34446	9.77009	-5.77172	1.41e-08	3.81e-07	8.76547
NOL7	-8.44204	84.6223	-5.77121	1.42e-08	3.82e-07	8.76269
WDR45B	-22.5542	123.704	-5.77094	1.42e-08	3.83e-07	8.76124
GTF2H3	-4.58321	22.1173	-5.77034	1.42e-08	3.84e-07	8.75805
GSPT1	-13.8957	75.9262	-5.76943	1.43e-08	3.85e-07	8.75312
TMX2P1	-2.36559	9.40764	-5.76884	1.43e-08	3.86e-07	8.74993
NUP160	-3.35135	14.3677	-5.76718	1.45e-08	3.9e-07	8.74103
ZNF43	-2.16783	9.40495	-5.76633	1.45e-08	3.91e-07	8.73645
NUBPL	-1.07402	5.94786	-5.76628	1.46e-08	3.91e-07	8.7362
ARF4	-55.826	319.784	-5.76603	1.46e-08	3.92e-07	8.73484
STK35	-4.35673	22.0804	-5.76384	1.48e-08	3.96e-07	8.72306
FBXO46	-4.53992	26.651	-5.76375	1.48e-08	3.96e-07	8.72261
POLA2	-1.19254	7.62616	-5.76371	1.48e-08	3.96e-07	8.72239
FTSJ3	-5.6182	43.6034	-5.76284	1.48e-08	3.98e-07	8.71772
VIM	-55.3773	194.84	-5.76137	1.5e-08	4.01e-07	8.7098
CTR9	-7.34105	40.1394	-5.76085	1.5e-08	4.02e-07	8.70698
LTBP1	-18.3979	50.8675	-5.76016	1.51e-08	4.03e-07	8.70332
TACC3	-2.99282	6.61373	-5.75814	1.52e-08	4.07e-07	8.69243
TPP2	-3.54282	17.3775	-5.7577	1.53e-08	4.08e-07	8.69011
STN1	-3.40397	28.0716	-5.75712	1.53e-08	4.09e-07	8.68698
ATP13A1	-5.46743	38.2819	-5.75684	1.53e-08	4.1e-07	8.68549
RECQL	-2.89111	10.1303	-5.7567	1.53e-08	4.1e-07	8.68473
MARCKS	-32.1983	145.743	-5.75615	1.54e-08	4.11e-07	8.68175
DHX36	-3.32789	15.1276	-5.75601	1.54e-08	4.11e-07	8.68101
MAN2A1	-4.40585	13.9478	-5.75467	1.55e-08	4.14e-07	8.67381
ADSS2	-10.6294	51.2943	-5.7544	1.55e-08	4.14e-07	8.67235
BRD3OS	-2.23913	12.083	-5.75391	1.56e-08	4.15e-07	8.66974
SLC4A1AP	-1.95842	16.0159	-5.75252	1.57e-08	4.18e-07	8.66228
POSTN	-14.6872	29.6595	-5.75162	1.58e-08	4.2e-07	8.65745
TMEM250	-6.03377	45.1021	-5.75133	1.58e-08	4.21e-07	8.6559
TBP	-2.76247	20.6285	-5.74999	1.59e-08	4.23e-07	8.64872
SMIM13	-1.67731	9.44937	-5.7493	1.6e-08	4.25e-07	8.64502
SYTL1	20.6369	87.5255	5.74897	1.6e-08	4.25e-07	8.64323
GASK1B	-17.4056	42.1454	-5.74813	1.61e-08	4.27e-07	8.63872
GNPDA2	-1.63517	9.30065	-5.74672	1.62e-08	4.3e-07	8.63116
ACTR6	-2.97659	19.5638	-5.74672	1.62e-08	4.3e-07	8.63115
ALKBH5	-14.9411	120.176	-5.74529	1.63e-08	4.33e-07	8.62351
ELL	-1.95104	14.7433	-5.74331	1.65e-08	4.38e-07	8.6129
AP2A2	-4.12199	35.5041	-5.74307	1.65e-08	4.38e-07	8.61163
EEF2KMT	-1.7092	11.2864	-5.74133	1.67e-08	4.42e-07	8.60229
HLTF	-9.14053	34.5685	-5.74077	1.68e-08	4.43e-07	8.59928
MRPS30	-2.90775	19.5081	-5.74009	1.68e-08	4.45e-07	8.59566
MT-CYB	4200.98	16534.4	5.73951	1.69e-08	4.46e-07	8.59256
RAP1A	-6.1961	39.749	-5.73851	1.7e-08	4.48e-07	8.58718
ANGEL1	-2.55277	13.4486	-5.73499	1.73e-08	4.57e-07	8.56834
STRBP	-3.80942	17.5663	-5.73376	1.74e-08	4.59e-07	8.56175
VHL	-8.0664	37.1258	-5.73296	1.75e-08	4.61e-07	8.55749
ARMC6	-6.63648	42.3748	-5.73286	1.75e-08	4.61e-07	8.55695
SFRP4	-43.8435	70.0564	-5.73217	1.76e-08	4.63e-07	8.55326
MRPS11	-1.74215	14.5895	-5.73123	1.77e-08	4.65e-07	8.54821
RIT1	-3.29856	18.4938	-5.72715	1.81e-08	4.75e-07	8.5264
UBQLN4	-7.67285	42.8487	-5.72612	1.82e-08	4.78e-07	8.5209
COMMD10	-6.63643	34.2131	-5.72598	1.82e-08	4.78e-07	8.52015
TOPBP1	-3.26109	14.2934	-5.72511	1.83e-08	4.8e-07	8.5155
MAPK14	-3.46479	19.525	-5.72495	1.83e-08	4.8e-07	8.51467
BLOC1S3	-2.61769	19.8478	-5.72493	1.83e-08	4.8e-07	8.51456
BBS9	-1.20429	7.00834	-5.72467	1.83e-08	4.8e-07	8.51318
MBNL1	-7.63075	37.3484	-5.72406	1.84e-08	4.81e-07	8.50991
ARMC1	-6.90309	35.9578	-5.72402	1.84e-08	4.81e-07	8.5097
LCORL	-1.20517	4.22817	-5.72401	1.84e-08	4.81e-07	8.50962
CASC3	-9.23682	62.3208	-5.72352	1.84e-08	4.82e-07	8.50702
VANGL1	-2.67085	11.3887	-5.72227	1.86e-08	4.85e-07	8.50037
MRPL4	-4.80479	31.9364	-5.72129	1.87e-08	4.88e-07	8.49509
GATAD2B	-2.88282	15.4286	-5.72107	1.87e-08	4.88e-07	8.49393
GRWD1	-3.30908	25.0847	-5.71962	1.88e-08	4.92e-07	8.48618
RPL5	-227.747	1408.56	-5.71771	1.9e-08	4.97e-07	8.47599
ZNF670	-1.13885	5.27957	-5.71666	1.91e-08	4.99e-07	8.47039
APBA3	-1.24637	9.35626	-5.71507	1.93e-08	5.03e-07	8.46189
VPS26A	-9.62359	57.243	-5.71505	1.93e-08	5.03e-07	8.46178
FMNL2	-4.90405	16.6876	-5.71503	1.93e-08	5.03e-07	8.46172
PHF19	-1.7535	8.57703	-5.71446	1.94e-08	5.04e-07	8.45867
ZNF592	-3.16447	17.8624	-5.71434	1.94e-08	5.04e-07	8.45803
TK1	-12.6216	28.9816	-5.71425	1.94e-08	5.04e-07	8.45755
UBE2W	-2.81047	13.1535	-5.71421	1.94e-08	5.04e-07	8.45731
TCTN1	-1.9975	13.771	-5.7138	1.94e-08	5.05e-07	8.45515
VAMP7	-10.7433	53.9869	-5.71091	1.98e-08	5.13e-07	8.43973
PIAS3	-6.13236	27.5419	-5.71085	1.98e-08	5.13e-07	8.4394
RANBP3	-3.05929	32.6074	-5.71073	1.98e-08	5.13e-07	8.43874
NBN	-7.99458	31.9251	-5.71011	1.98e-08	5.14e-07	8.43548
CDC42EP1	-16.765	70.659	-5.70968	1.99e-08	5.15e-07	8.43315
PAM	-10.3194	38.5952	-5.70913	2e-08	5.17e-07	8.43022
VRK2	-2.45548	11.8424	-5.70802	2.01e-08	5.2e-07	8.42432
CHRAC1	-5.18409	28.9024	-5.70645	2.02e-08	5.23e-07	8.41594
FAM193A	-2.96497	19.0657	-5.70555	2.04e-08	5.25e-07	8.41113
STK24	-2.89211	14.2751	-5.70528	2.04e-08	5.26e-07	8.40974
ZNF623	-4.31698	16.2737	-5.7049	2.04e-08	5.27e-07	8.4077
ITGA11	-2.56027	5.1705	-5.70488	2.04e-08	5.27e-07	8.40757
CAPZA2	-6.81777	37.0833	-5.70443	2.05e-08	5.27e-07	8.4052
PRKCSH	-31.3715	284.25	-5.70316	2.06e-08	5.31e-07	8.39841
CAPN1	-12.9029	84.0853	-5.70268	2.07e-08	5.32e-07	8.39588
TBC1D5	-3.59625	17.2812	-5.70237	2.07e-08	5.33e-07	8.39421
CRTC3	-2.24358	13.3824	-5.70193	2.08e-08	5.34e-07	8.3919
BCLAF1	-8.52929	45.0817	-5.70167	2.08e-08	5.34e-07	8.39051
RTF1	-6.94277	43.3094	-5.70149	2.08e-08	5.34e-07	8.38954
CLIC2	-1.7131	5.81718	-5.70068	2.09e-08	5.37e-07	8.38522
CNOT11	-7.92964	57.4068	-5.70037	2.09e-08	5.37e-07	8.38357
ST3GAL1	-3.23651	8.26045	-5.69909	2.11e-08	5.4e-07	8.37677
KPNA1	-3.31775	18.5652	-5.69862	2.11e-08	5.42e-07	8.37428
FGD5-AS1	-14.6752	80.6021	-5.69842	2.12e-08	5.42e-07	8.37317
SPAST	-3.08826	15.8388	-5.69838	2.12e-08	5.42e-07	8.373
GINS1	-1.19108	2.72072	-5.69824	2.12e-08	5.42e-07	8.37224
CPNE2	-3.86588	12.6627	-5.6969	2.13e-08	5.46e-07	8.36511
PACRGL	-1.1894	7.59356	-5.69581	2.15e-08	5.49e-07	8.35931
CUL2	-3.24361	20.0387	-5.69265	2.18e-08	5.58e-07	8.34252
NUFIP2	-5.54022	27.0165	-5.69148	2.2e-08	5.61e-07	8.33627
ZNF512B	-4.1132	20.9625	-5.69126	2.2e-08	5.61e-07	8.33511
PRPF40A	-5.80398	28.5842	-5.69072	2.21e-08	5.63e-07	8.33226
BAG5	-5.10419	32.5994	-5.68937	2.22e-08	5.66e-07	8.32506
GTSE1	-1.29734	2.16546	-5.68833	2.24e-08	5.69e-07	8.31952
PUM1	-10.9665	54.5482	-5.68824	2.24e-08	5.69e-07	8.31906
TPR	-6.60814	31.3341	-5.68801	2.24e-08	5.7e-07	8.31785
KAT5	-3.96692	31.2348	-5.68776	2.24e-08	5.7e-07	8.31652
MYCBP	-3.12984	25.1831	-5.68741	2.25e-08	5.71e-07	8.31468
CALCRL	-3.85258	9.14921	-5.68593	2.27e-08	5.75e-07	8.30677
SUSD1	-2.7298	9.49229	-5.68526	2.27e-08	5.77e-07	8.30325
RASA3	-2.61425	10.7263	-5.68315	2.3e-08	5.82e-07	8.29205
CRKL	-6.94803	43.6712	-5.68301	2.3e-08	5.83e-07	8.2913
ARRB2	-3.02539	16.9149	-5.68271	2.31e-08	5.83e-07	8.28968
AC009407.1	3.4684	6.39486	5.68222	2.31e-08	5.85e-07	8.28707
MTRR	-3.6222	15.5499	-5.68155	2.32e-08	5.87e-07	8.28355
AC079075.1	1.31491	2.31964	5.68145	2.32e-08	5.87e-07	8.28301
SDHD	-10.3341	68.3968	-5.68136	2.32e-08	5.87e-07	8.28251
FOXN2	-2.82558	9.56516	-5.68058	2.33e-08	5.89e-07	8.27837
AGPAT3	-5.7543	32.8739	-5.68037	2.34e-08	5.89e-07	8.27729
DDX41	-5.21636	51.6833	-5.67939	2.35e-08	5.92e-07	8.27207
STK38	-5.17838	34.6403	-5.6792	2.35e-08	5.92e-07	8.27109
AP001000.1	-2.82472	12.934	-5.67907	2.35e-08	5.92e-07	8.27035
CGGBP1	-8.76116	45.9119	-5.67904	2.35e-08	5.92e-07	8.2702
DCTN4	-8.11768	49.6032	-5.67884	2.36e-08	5.93e-07	8.26913
ADGRL4	-4.42051	13.7371	-5.67801	2.37e-08	5.95e-07	8.26475
[truncated: 2,879 more rows]
