# Supplementary material for: Roles of m5C RNA Modification Patterns in Biochemical Recurrence and Tumor Microenvironment Characterization of Prostate Adenocarcinoma
Source: Front Immunol. 2022 May 4;13:869759. doi: 10.3389/fimmu.2022.869759 (PMC9114358; doi:10.3389/fimmu.2022.869759)
Supplement: Supplementary file 11 [file Table_5.xlsx]

## Sheet: Sheet1
Supplemental table 5: Univariate COX analysis on 4877 DEGs between two m5C modification patterns.
id	HR	HR.95L	HR.95H	pvalue
PTMA	1.00187	1.00033	1.00341	0.0174061
CTPS1	1.05203	1.0162	1.08912	0.00412049
DPH2	1.02835	1.00443	1.05283	0.0198896
RCC2	1.00784	1.00249	1.01322	0.00402443
HNRNPAB	1.00638	1.0023	1.01046	0.00211887
FTSJ1	1.03188	1.00192	1.06275	0.0368688
HTRA2	1.07114	1.02878	1.11524	0.000843445
ENO1	1.00125	1.00016	1.00235	0.0242125
SERPINH1	1.01427	1.00621	1.0224	0.000500126
NOP56	1.01668	1.00118	1.03242	0.0347834
TRAF7	1.01103	1.0015	1.02064	0.0231997
STIP1	1.00636	1.00048	1.01228	0.0340649
CHCHD3	1.03407	1.00757	1.06127	0.0114342
MACROH2A1	1.04233	1.01642	1.06891	0.00124859
ELK1	1.03517	1.01471	1.05603	0.000687212
POGLUT2	1.17164	1.0471	1.31099	0.00573161
LMNB2	1.02531	1.00974	1.04113	0.00136775
COLGALT1	1.03004	1.01008	1.05039	0.00303233
DUSP7	1.0786	1.01797	1.14283	0.010363
TUBA1B	1.00707	1.00175	1.01241	0.00915421
MCM3	1.01492	1.0019	1.02812	0.0246269
MCM6	1.03014	1.00508	1.05583	0.0181025
SZRD1	1.01627	1.00201	1.03073	0.0251685
U2AF2	1.00886	1.00245	1.01531	0.00666295
STX6	1.03496	1.0039	1.06697	0.0270746
PLOD3	1.02945	1.01036	1.0489	0.0023763
IFT52	1.03024	1.00341	1.05778	0.0269288
E2F3	1.05905	1.01604	1.10388	0.00668157
RNF130	1.05593	1.00708	1.10715	0.0243272
OAF	1.02983	1.0095	1.05056	0.00385856
TCF3	1.02681	1.00738	1.04662	0.00664506
TMEM183A	1.03885	1.01046	1.06804	0.00701597
CBX1	1.01173	1.00246	1.02107	0.0129841
DBN1	1.01612	1.00788	1.02443	0.000118458
P3H1	1.07345	1.02142	1.12812	0.00516903
ABCF2	1.0308	1.0079	1.05423	0.00814343
C1orf174	1.10751	1.03661	1.18326	0.00248609
MOCS1	1.09944	1.04485	1.15687	0.000263694
DCLRE1B	1.16463	1.04256	1.301	0.00698322
LAMC1	1.00529	1.00013	1.01048	0.0446548
PTBP1	1.00973	1.00152	1.01801	0.020153
FLII	1.02418	1.01284	1.03565	2.61339e-05
DNAJA3	1.02988	1.00421	1.05621	0.0222195
LDHA	1.00273	1.00121	1.00425	0.000427273
RUVBL1	1.02337	1.00697	1.04003	0.00507862
PPP1R9B	1.03204	1.01722	1.04707	1.93023e-05
KNOP1	1.09231	1.0144	1.17621	0.0193593
TMEM201	1.13722	1.03959	1.24403	0.00499096
TTC9C	1.06274	1.00774	1.12075	0.0248218
DHX37	1.08794	1.00422	1.17863	0.0391014
CNOT9	1.02972	1.00045	1.05984	0.046544
STRAP	1.00697	1.00161	1.01236	0.0107489
WIZ	1.05518	1.02548	1.08574	0.000226612
KPNA2	1.01407	1.00473	1.02349	0.00306752
ARPC2	1.01525	1.00214	1.02854	0.0224526
LIMK1	1.08718	1.04499	1.13107	3.4861e-05
SEPTIN11	1.01999	1.00102	1.03932	0.0387669
BAK1	1.06208	1.02647	1.09893	0.000537368
GPI	1.00858	1.00227	1.01494	0.00762857
SLC20A1	1.05086	1.01823	1.08453	0.00205045
UBE2I	1.035	1.00648	1.06433	0.0158029
C1orf216	1.0897	1.04667	1.13449	2.92384e-05
MIF4GD	1.05634	1.02393	1.08978	0.000566966
UBE2D2	1.0175	1.00084	1.03444	0.0394813
PRKACA	1.02801	1.00335	1.05328	0.0257377
DNMT1	1.08206	1.03792	1.12808	0.000206152
GET3	1.00783	1.00017	1.01555	0.0452351
BOD1	1.01759	1.00496	1.03037	0.00620431
FBXO5	1.10781	1.0152	1.20887	0.0215212
PRCC	1.0217	1.00743	1.03617	0.00276962
CARM1	1.03305	1.00642	1.06039	0.014686
GRK6	1.03568	1.00711	1.06506	0.0140226
TRIM65	1.06702	1.02689	1.10872	0.000910756
MYBBP1A	1.02354	1.00565	1.04176	0.00972463
TTL	1.18321	1.03449	1.3533	0.0140956
SPDL1	1.12542	1.03274	1.2264	0.00704234
TIMM44	1.05293	1.01372	1.09366	0.0077355
MAP4K4	1.03462	1.01131	1.05848	0.00342213
UBAP2L	1.01255	1.00222	1.02298	0.0171354
SMARCD1	1.04495	1.01666	1.07403	0.0016902
MYH9	1.00262	1.0007	1.00453	0.00731843
SRPK1	1.03566	1.00812	1.06394	0.0108289
RFX5	1.02516	1.00244	1.0484	0.0297959
RBM3	1.00526	1.0019	1.00864	0.00214682
TMEM132A	1.0201	1.0114	1.02888	5.2567e-06
CAD	1.05255	1.01709	1.08925	0.00340226
PARN	1.02654	1.00472	1.04883	0.0168614
TCOF1	1.06811	1.01436	1.12471	0.0123836
KCTD5	1.03264	1.00835	1.05751	0.00818223
UBFD1	1.02093	1.00037	1.04191	0.0459685
TBRG4	1.03391	1.00372	1.06499	0.0273909
NETO2	1.0485	1.00395	1.09502	0.0325082
NCAPD2	1.02446	1.00309	1.04628	0.0246616
LPCAT1	1.0201	1.00674	1.03363	0.00309561
CBX3	1.00707	1.00172	1.01245	0.00950109
TFE3	1.05333	1.03017	1.077	4.6238e-06
LMNB1	1.01968	1.00533	1.03424	0.00702338
GAPDH	1.0005	1.00011	1.0009	0.0124436
SEPTIN7	1.02492	1.00414	1.04614	0.0184982
PPP6R1	1.04132	1.01561	1.06769	0.00150358
SAMD1	1.01456	1.00039	1.02893	0.0439991
CLSTN3	1.0427	1.0277	1.05792	1.55747e-08
DNAJB6	1.0878	1.01732	1.16316	0.0138034
ACOT7	1.04128	1.0073	1.07641	0.0168636
LDHAP4	1.14176	1.02839	1.26762	0.0129668
ARPC5	1.03313	1.00871	1.05815	0.00757759
OAZ2	1.03317	1.00224	1.06506	0.03534
GATAD2A	1.04505	1.01477	1.07624	0.00331118
ATXN2L	1.02477	1.01103	1.03869	0.000379461
EIF3D	0.994825	0.989993	0.999681	0.0367643
HNRNPD	1.01244	1.00112	1.02389	0.0311013
RPL26L1	1.02913	1.0099	1.04873	0.00285151
EARS2	1.02489	1.00008	1.05031	0.0492394
NUP210	1.01199	1.00066	1.02344	0.0380611
PSMC4	1.00869	1.00012	1.01732	0.0467627
PKM	1.00422	1.00149	1.00697	0.00243887
NOB1	0.989382	0.979174	0.999698	0.0436836
TPST1	1.03148	1.00103	1.06285	0.042633
FLAD1	1.03035	1.00398	1.05741	0.0238206
AGRN	1.00866	1.00232	1.01503	0.00731371
WASF1	1.03792	1.00068	1.07654	0.0458658
PUS7	1.03427	1.0008	1.06886	0.0446722
UIMC1	1.11086	1.05014	1.1751	0.000246755
DIAPH1	1.01152	1.00024	1.02292	0.045295
PRMT1	1.01227	1.00161	1.02304	0.0240032
PKNOX1	1.12594	1.00933	1.25602	0.0334674
ELK3	1.03066	1.01043	1.05131	0.00283366
QSOX2	1.03675	1.00818	1.06613	0.0113696
FAM118B	1.07786	1.0226	1.13611	0.00523665
LSM14B	1.02531	1.00875	1.04215	0.00263282
GRPEL2	1.0524	1.00424	1.10286	0.0326026
FXYD3	0.997527	0.995947	0.999109	0.00219828
SH3GL1	1.01825	1.0056	1.03107	0.00458974
EIF4G3	1.02206	1.00421	1.04023	0.0152381
CASP3	1.03226	1.00602	1.05919	0.0156444
PANK4	1.08226	1.00897	1.16086	0.0271249
PTPN12	1.03089	1.01063	1.05155	0.00266444
HPRT1	1.01688	1.00557	1.02831	0.00334898
RAB3IL1	1.09958	1.03615	1.16689	0.0017385
ENG	1.0115	1.00695	1.01608	6.67293e-07
TAF4	1.14806	1.02853	1.28149	0.0138374
DCAF4	1.1265	1.01871	1.2457	0.0202814
MEX3A	1.02263	1.00667	1.03884	0.00530253
PORCN	1.13832	1.05179	1.23197	0.00131977
PLAA	1.03022	1.00089	1.0604	0.0433481
ELMO1	1.15898	1.06312	1.26348	0.000809163
CDK11B	1.07313	1.02031	1.12867	0.00612706
NACC1	1.01763	1.00412	1.03133	0.0103876
UBE2V1	1.13981	1.00226	1.29623	0.0461119
EXOSC10	1.03989	1.00948	1.07122	0.00980223
GTPBP3	1.08276	1.04285	1.12421	3.33873e-05
CTSL	1.00865	1.00283	1.01451	0.00354847
DDX27	1.03311	1.00154	1.06567	0.0396519
RNASEH1	1.05324	1.01093	1.09733	0.0131608
AC099850.4	1.06082	1.00504	1.1197	0.0321552
CDCA4	1.05205	1.01409	1.09143	0.00680272
PDCD6	1.02972	1.00649	1.05348	0.011875
CDK16	1.05569	1.03247	1.07943	1.78555e-06
RNF44	1.02601	1.00554	1.04689	0.012498
TIMELESS	1.0398	1.0071	1.07357	0.016686
RRM2	1.03526	1.00925	1.06195	0.00761088
ILF3	1.02102	1.00997	1.03218	0.000178517
TTYH3	1.01923	1.01015	1.02839	3.01772e-05
STMN1	1.01294	1.00324	1.02273	0.008826
KIF4A	1.06876	1.03223	1.10659	0.000178779
OIP5	1.19685	1.0877	1.31694	0.000230451
TIMM17A	1.01925	1.00111	1.03772	0.0374824
AIFM1	1.01535	1.00389	1.02694	0.00853341
GNPDA1	1.0197	1.00073	1.03904	0.0417783
SLC5A6	1.04373	1.01625	1.07196	0.00166668
LLGL1	1.06241	1.02421	1.10204	0.00119467
NUP62	1.02806	1.00046	1.05642	0.0462234
CACNG4	0.983527	0.971839	0.995354	0.0064604
MAEA	1.0513	1.01197	1.09216	0.0101228
CYCS	1.00983	1.00339	1.01631	0.00271788
PDE6D	1.07051	1.00997	1.13467	0.0217883
HMMR	1.04564	1.00233	1.09082	0.03866
ACTN4	1.00463	1.00067	1.00861	0.0220032
SPARC	1.0017	1.0008	1.00259	0.000196057
MSANTD3	1.08295	1.02271	1.14674	0.00635352
FTH1	1.00259	1.00098	1.0042	0.00158919
IL13RA1	1.01104	1.00151	1.02065	0.0230335
AXIN1	1.07169	1.03423	1.11051	0.000137007
ZBTB12	1.04056	1.00244	1.08013	0.036808
RFC2	1.02008	1.00054	1.04	0.0439191
PDGFRB	1.01267	1.00417	1.02124	0.00340965
ITGB1BP1	1.08548	1.03497	1.13845	0.000740759
ZNF343	1.10921	1.00099	1.22913	0.0478411
KIF23	1.14931	1.04926	1.25891	0.00274771
MYO19	1.12902	1.05263	1.21095	0.000686793
TRIP13	1.05817	1.00231	1.11714	0.0410142
MEX3B	1.12824	1.04889	1.2136	0.00118402
YWHAZ	1.00252	1.00056	1.00449	0.0118346
WRAP73	1.26881	1.12674	1.4288	8.51666e-05
BUB1B	1.10478	1.03322	1.1813	0.00354174
AMPD2	1.06594	1.02563	1.10783	0.00116749
EPS15L1	1.10525	1.01969	1.19799	0.0149213
CHRM1	0.989344	0.983226	0.995501	0.000712991
TGFBI	1.03082	1.01543	1.04644	7.63074e-05
COL8A1	1.01638	1.00395	1.02897	0.00968148
TTC13	1.12838	1.06276	1.19805	7.77023e-05
NUSAP1	1.02715	1.00996	1.04464	0.00186514
RAD54L	1.13309	1.04485	1.22878	0.00252193
POLG	1.04043	1.01032	1.07143	0.00816405
XXYLT1	1.09089	1.01607	1.17121	0.0164058
PLCG1	1.06185	1.03717	1.08711	5.6646e-07
DLGAP5	1.06774	1.01025	1.1285	0.0202892
DNAJC9	1.09385	1.03622	1.15469	0.00116068
SAMHD1	1.0191	1.0084	1.02992	0.000442439
MGAT4B	1.0337	1.02076	1.0468	2.51369e-07
CDC45	1.07894	1.02253	1.13845	0.00555026
SRSF4	1.01949	1.00488	1.03431	0.00874709
H2AZ1	1.00506	1.00156	1.00857	0.00456516
DYNLL1	1.00935	1.00312	1.01561	0.00323075
COL15A1	1.01182	1.00521	1.01847	0.000441283
CDC7	1.14503	1.03501	1.26674	0.00859656
AP1S2	1.10015	1.03731	1.16679	0.00146817
OSBPL5	1.03462	1.00633	1.06369	0.0161153
UBE2A	1.04214	1.01347	1.07162	0.00373425
UBA3	1.02119	1.00215	1.04059	0.0290104
GMIP	1.06304	1.02287	1.10478	0.00186685
ENSA	1.01232	1.00506	1.01963	0.000859747
RFC5	1.06251	1.01287	1.11458	0.0129931
AC115618.2	1.01535	1.00216	1.02872	0.0224412
CPNE1	1.02001	1.01148	1.02861	3.74661e-06
PRR11	1.09584	1.01363	1.18472	0.0214307
INPP4A	1.20275	1.0856	1.33255	0.000414474
CDH11	1.03903	1.01237	1.0664	0.00388925
MELK	1.07078	1.02083	1.12317	0.00501626
FRMD8	1.03664	1.00688	1.06728	0.015473
LINC02688	0.935348	0.875364	0.999442	0.0481005
FAM189B	1.01923	1.00599	1.03264	0.00428815
ADAM17	1.07148	1.01076	1.13584	0.020367
LHFPL6	1.02086	1.01025	1.03158	0.000107496
POTEH-AS1	0.916298	0.850104	0.987645	0.0223171
RACGAP1	1.03671	1.01072	1.06336	0.00537887
ACBD6	1.09264	1.03586	1.15253	0.00113744
RNF146	1.02839	1.00048	1.05708	0.0461524
COL3A1	1.00204	1.00098	1.0031	0.000160589
PLEKHM2	1.03279	1.01328	1.05268	0.000914323
SLC25A22	1.01835	1.00312	1.03382	0.0180589
EXOSC3	1.05069	1.00928	1.09381	0.0159551
DFFB	1.1829	1.05973	1.32039	0.00275285
PACC1	1.05162	1.00162	1.10412	0.0428588
SENP1	1.07625	1.00142	1.15668	0.0456549
HNRNPA2B1	1.00433	1.00106	1.00761	0.00949247
ZCCHC7	1.04842	1.00182	1.09719	0.0415249
LAPTM4B	1.00767	1.00126	1.01413	0.0189765
PTK2	1.02156	1.00435	1.03906	0.01386
CDR2L	1.01508	1.00092	1.02943	0.0367236
COL4A1	1.00718	1.0034	1.01097	0.000193966
PLPP2	1.01522	1.00192	1.0287	0.0248034
GARS1	1.01314	1.00419	1.02217	0.00392052
ZNF598	1.03879	1.01472	1.06342	0.00146203
GPKOW	1.0418	1.01426	1.07009	0.00273619
KIF20A	1.06251	1.0228	1.10377	0.00180958
CDC20	1.02815	1.01305	1.04348	0.000235197
GRAMD1A	1.01614	1.00676	1.02561	0.000715792
HYAL2	1.02517	1.00267	1.04818	0.0281
DALRD3	1.06307	1.02671	1.10073	0.000572559
TPX2	1.02703	1.00961	1.04475	0.00224786
BGN	1.00152	1.00084	1.0022	1.06951e-05
SRSF2	1.01187	1.00377	1.02004	0.00401691
RAB31	1.0334	1.01256	1.05467	0.00157424
ZNF354A	1.11657	1.05153	1.18563	0.000317073
GLS	1.03769	1.00337	1.07319	0.031072
PTDSS1	1.01625	1.00369	1.02898	0.0111011
CDCA8	1.05057	1.00738	1.09561	0.0212768
PODXL	1.02027	1.00872	1.03196	0.000554447
VAV2	1.02849	1.01262	1.04461	0.00039934
TOP2A	1.01609	1.00191	1.03048	0.0260326
TCFL5	1.11557	1.03462	1.20286	0.00443514
BUB1	1.08486	1.02468	1.14858	0.00515227
KCNAB2	1.17108	1.09216	1.2557	9.14385e-06
SDC3	1.01406	1.00107	1.02722	0.0338351
CTSZ	1.0066	1.00352	1.00969	2.61827e-05
FOXK2	1.04923	1.00375	1.09678	0.0335609
TAFA5	1.02255	1.00167	1.04386	0.0341615
TBC1D10B	1.09345	1.04772	1.14117	4.15822e-05
PHTF2	1.08499	1.01439	1.16051	0.0174967
NUP107	1.07976	1.00547	1.15954	0.0348601
ATXN7L3	1.03213	1.00913	1.05566	0.00595126
MEN1	1.039	1.0197	1.05867	6.37576e-05
NSMF	1.0207	1.0108	1.0307	3.80341e-05
COL1A2	1.00253	1.00092	1.00415	0.00205725
COPS7B	1.07963	1.0139	1.14962	0.0168125
CCNB1	1.01469	1.00079	1.0288	0.0383099
CTSK	1.01116	1.00357	1.0188	0.00388029
FBXL19	1.07693	1.04366	1.11125	3.66319e-06
MKI67	1.04213	1.01	1.07528	0.00981115
SPAG5	1.06391	1.0248	1.10452	0.00118754
QKI	1.06363	1.01816	1.11112	0.00564854
PHF6	1.04117	1.00361	1.08014	0.0313718
CDC42EP5	0.996594	0.993495	0.999702	0.0317695
NABP2	1.03407	1.01235	1.05627	0.00198311
DPM1	1.01647	1.00324	1.02988	0.0145381
TXNL1	0.954981	0.912723	0.999195	0.0460611
UBE2T	1.01984	1.00435	1.03558	0.0118908
BCR	1.04686	1.00658	1.08874	0.0221684
SRI	1.01673	1.0038	1.02984	0.0110971
PSMD2	1.00762	1.00075	1.01453	0.0296289
PARP2	1.12239	1.04758	1.20254	0.00103456
LETM1	1.03597	1.00255	1.07051	0.0346972
PSMA7	1.00456	1.00138	1.00776	0.00497976
RILPL1	1.1909	1.05861	1.33972	0.00363819
POLD1	1.11989	1.058	1.18539	9.46158e-05
DHX35	1.2288	1.09593	1.37777	0.000417152
MSL3	1.09756	1.04254	1.15549	0.000389107
NCAPG2	1.07053	1.01328	1.13102	0.0150839
SMARCA4	1.02137	1.00759	1.03534	0.00227567
OSGIN2	1.04054	1.0096	1.07244	0.00987195
ADAMTS2	1.07054	1.03738	1.10476	2.17982e-05
RGS3	1.0702	1.01471	1.12872	0.0125076
TAF5L	1.0735	1.00489	1.1468	0.0353136
CPOX	1.05204	1.01134	1.09438	0.0117344
DDX23	1.01618	1.00102	1.03156	0.0363948
NELFA	1.04584	1.00134	1.09232	0.0433455
SLC29A1	1.01724	1.00429	1.03035	0.00891449
HNRNPM	1.00899	1.00074	1.01731	0.0326507
DNTTIP1	1.03428	1.00413	1.06535	0.0255578
IFNAR2	1.08513	1.01258	1.16286	0.0206548
SNRPA1	1.03617	1.0079	1.06523	0.0118109
GAB2	1.08626	1.03034	1.14522	0.00215105
PRC1	1.04506	1.01141	1.07984	0.0083162
HSF1	1.01672	1.00606	1.0275	0.00205098
NOTCH3	1.02496	1.01425	1.03578	4.23069e-06
SPC25	1.11086	1.03433	1.19305	0.00389205
DOCK6	1.20139	1.12913	1.27827	6.73483e-09
HARS2	1.04225	1.00397	1.08199	0.0301936
MAD2L1	1.0718	1.0133	1.13368	0.0154625
CHRNA2	0.995067	0.990938	0.999213	0.019739
RBP7	0.975232	0.955677	0.995187	0.0152343
RALGDS	1.02081	1.01063	1.0311	5.60999e-05
CALHM2	1.06629	1.02676	1.10733	0.000866903
RIPOR1	1.03721	1.01524	1.05967	0.000825578
SAMD4B	1.02299	1.00055	1.04594	0.0445762
UPF3B	1.04527	1.00267	1.08969	0.0370323
CYRIB	1.05305	1.01629	1.09113	0.0043532
DEDD	1.03714	1.00741	1.06775	0.0139997
NADK	1.02927	1.00531	1.0538	0.0163642
DVL3	1.03087	1.01367	1.04835	0.000396672
NELFCD	1.0198	1.00017	1.03982	0.048074
WDR70	1.08653	1.00698	1.17238	0.0324212
ANTXR1	1.01002	1.00334	1.01674	0.0032124
CASP8	1.0724	1.01315	1.13512	0.0159375
SLC41A2	1.1026	1.02356	1.18774	0.0100662
ZNF367	1.08984	1.01659	1.16836	0.0153741
NOL6	1.02674	1.01004	1.04371	0.00160778
STX3	1.0308	1.01102	1.05097	0.00215115
RFX1	1.11357	1.04708	1.18428	0.000615497
C8orf33	1.00792	1.00184	1.01404	0.0106381
INCENP	1.05561	1.00014	1.11416	0.0494001
COL1A1	1.00274	1.00158	1.0039	3.42533e-06
NREP	1.04917	1.01254	1.08714	0.00811797
USF2	1.02782	1.01581	1.03997	4.73741e-06
MARK4	1.07554	1.02403	1.12965	0.00363349
FCGR2A	1.11059	1.0638	1.15943	1.78401e-06
THY1	1.03036	1.0132	1.04782	0.000483686
NDUFAF7	1.16226	1.05289	1.283	0.00286398
MSR1	1.07584	1.02462	1.12963	0.00331446
NCAPH	1.05233	1.00703	1.09967	0.0230977
TGFB1	1.0255	1.01378	1.03736	1.75249e-05
AURKA	1.05198	1.00118	1.10536	0.0447681
RAB12	1.02372	1.00005	1.04795	0.0495044
CEP170	1.11089	1.01896	1.21113	0.017031
C1orf198	1.02102	1.00024	1.04222	0.0473817
RBM7	1.05246	1.00071	1.10689	0.0468541
SOX12	1.02275	1.00376	1.0421	0.0186464
PEBP4	0.994459	0.989714	0.999227	0.0227861
TBC1D9B	1.01196	1.00035	1.0237	0.0434498
MGP	1.00078	1.00031	1.00126	0.00128553
KLF13	1.02099	1.00088	1.04151	0.0407451
CLCN2	1.1001	1.0379	1.16604	0.00131596
PGK1	1.00265	1.00109	1.00421	0.000868027
RAPGEF5	1.10786	1.02622	1.19599	0.00872501
TAF6	1.05479	1.02187	1.08877	0.000976452
DPP9	1.09011	1.03364	1.14966	0.00147712
ENTR1	1.02675	1.00827	1.04557	0.00439324
EHD4	1.04539	1.01513	1.07656	0.00305776
MFAP4	1.00196	1.00022	1.00371	0.0276718
ASF1B	1.02859	1.00656	1.0511	0.0107013
COL4A2	1.00552	1.00246	1.00859	0.000405859
ELOC	1.03775	1.01668	1.05926	0.000399928
ARHGDIB	1.0025	1.0002	1.0048	0.0333383
DHX30	1.02782	1.00468	1.05149	0.0181757
SRPX2	1.06137	1.01503	1.10981	0.00891876
ARAP3	1.08936	1.04359	1.13714	9.3148e-05
PKP4	1.03038	1.00837	1.05288	0.00660951
CD276	1.00615	1.00141	1.0109	0.010886
PLXND1	1.06028	1.03556	1.08559	1.1588e-06
ACAD9	1.02642	1.00523	1.04806	0.014283
LSG1	1.04207	1.01231	1.07271	0.00530385
RRS1	1.01004	1.00161	1.01853	0.0194782
PRKAG2	1.02989	1.00903	1.05117	0.00478305
PHTF1	1.22937	1.10237	1.37101	0.000205874
PFAS	1.0365	1.00723	1.06662	0.0141841
INPPL1	1.01662	1.0062	1.02716	0.00171441
LYN	1.04063	1.01289	1.06912	0.00385706
SAFB	1.02801	1.00464	1.05192	0.018565
FCGR3A	1.0252	1.00954	1.0411	0.00152732
IGFBP7	1.00128	1.00061	1.00195	0.000175016
TMEM70	1.02499	1.00443	1.04597	0.0169738
UACA	1.03808	1.00358	1.07376	0.0302059
PLK1	1.06667	1.02851	1.10625	0.000515322
ORAI2	1.06048	1.01893	1.10371	0.00398048
MPRIP	1.05321	1.02063	1.08682	0.00122064
RAB6B	1.04236	1.01964	1.06558	0.000223952
VEZT	1.03242	1.00528	1.0603	0.0189091
SMC4	1.05176	1.00331	1.10255	0.0359747
UHRF1	1.08838	1.01798	1.16365	0.013057
PHRF1	1.02448	1.00029	1.04925	0.0472945
VDR	1.1029	1.00986	1.2045	0.0293894
IRAK1	1.00712	1.00295	1.01131	0.000799755
NFKB1	1.02036	1.00099	1.0401	0.0393181
FUS	1.01835	1.00987	1.02691	2.02724e-05
ZNF48	1.09899	1.03425	1.16777	0.00230944
TMPO	1.02938	1.00469	1.05468	0.0194096
CCNA2	1.03186	1.00327	1.06125	0.0286674
STK25	1.03228	1.01206	1.0529	0.00164852
SHCBP1	1.13773	1.02425	1.26377	0.0160835
MDH1	0.986407	0.973166	0.999828	0.0471586
SLC12A7	1.03386	1.02085	1.04703	2.55526e-07
TOMM40L	1.06169	1.01248	1.1133	0.0134402
KIF2C	1.07106	1.02355	1.12077	0.00302137
MS4A6A	1.06375	1.03193	1.09655	6.6544e-05
CDKN3	1.04332	1.00636	1.08163	0.0211776
DNM2	1.02544	1.0008	1.05068	0.0429612
IPO13	1.03297	1.00694	1.05967	0.0127203
NDE1	1.09442	1.014	1.18121	0.0205047
FMNL3	1.18875	1.10375	1.2803	4.92701e-06
ENPP1	1.0692	1.00596	1.13642	0.0314828
CFI	1.03871	1.00884	1.06948	0.0107496
MAGOH	1.0251	1.00655	1.044	0.0077875
CDC42SE1	1.0065	1.00012	1.01291	0.0457573
KDM5C	1.02342	1.00499	1.04218	0.0125144
C16orf91	1.02146	1.00423	1.03899	0.0144221
CABLES1	1.11203	1.02619	1.20506	0.00957947
MYBL2	1.03093	1.01488	1.04724	0.000141666
MGRN1	1.05287	1.02392	1.08265	0.000293618
PLXDC1	1.28366	1.16859	1.41006	1.87548e-07
CMTM3	1.03226	1.01534	1.04947	0.000166943
ZNF641	1.08686	1.00703	1.17303	0.0323663
PCNT	1.11251	1.04706	1.18204	0.00056746
HDAC7	1.07619	1.04296	1.11047	4.46653e-06
C12orf49	1.04308	1.00916	1.07814	0.0123893
KARS1	0.989363	0.979825	0.998994	0.0304888
ASPN	1.02137	1.01124	1.03161	3.24949e-05
NBL1	0.996186	0.992645	0.99974	0.0354488
WDR76	1.11183	1.00149	1.23432	0.046823
DENND4B	1.06592	1.0334	1.09946	5.38067e-05
CDH13	1.13022	1.0213	1.25076	0.0179031
KBTBD2	1.03454	1.00198	1.06815	0.037411
RHBDF2	1.14573	1.07695	1.2189	1.65525e-05
TNPO2	1.03017	1.01534	1.04523	5.91247e-05
MS4A4A	1.08635	1.04324	1.13125	6.10507e-05
NSD2	1.09256	1.03465	1.15371	0.00144287
TOR3A	1.04279	1.01895	1.06718	0.000382702
NINJ2	1.12546	1.02934	1.23056	0.00946159
TOP3A	1.06336	1.00476	1.12537	0.0336705
RAI14	1.03876	1.01385	1.06428	0.00213264
BRD4	1.05418	1.0196	1.08993	0.00193289
VSIG4	1.05441	1.02601	1.0836	0.000142666
CXorf56	1.04355	1.00202	1.0868	0.0396444
RBM17	1.0766	1.03594	1.11886	0.00017143
DCAF15	1.10138	1.05497	1.14983	1.10043e-05
PIK3R3	1.03814	1.01047	1.06658	0.00662696
SLC6A8	1.02388	1.01156	1.03635	0.000132348
UBE2J2	1.03328	1.00596	1.06134	0.0166302
YEATS2	1.03586	1.00634	1.06624	0.0169156
ELOVL1	1.00826	1.00215	1.0144	0.00799505
CDCA5	1.04388	1.01262	1.07611	0.00563292
TSEN15	1.0216	1.00259	1.04096	0.0257413
ZFAT	1.11322	1.03295	1.19972	0.00497174
TIMMDC1	1.01068	1.00061	1.02084	0.0375424
NAA40	1.13725	1.08005	1.19748	1.03773e-06
SUN1	1.03142	1.00978	1.05354	0.00424979
BIRC5	1.02079	1.00172	1.04022	0.0324405
HEYL	1.02021	1.00721	1.03339	0.00223827
IRF2BP2	1.00758	1.00137	1.01384	0.0166663
FPR3	1.06523	1.03149	1.10008	0.000119254
MTA1	1.0505	1.02854	1.07292	4.84562e-06
ADCY3	1.05886	1.01571	1.10385	0.00705334
TAF15	1.01787	1.0048	1.0311	0.00720265
IQGAP3	1.13978	1.06905	1.21519	6.26489e-05
MTERF3	1.02789	1.01237	1.04364	0.000395483
MAPKAPK2	1.02063	1.00973	1.03166	0.000194307
GGT5	1.02851	1.00789	1.04955	0.00650996
E2F4	1.0274	1.00323	1.05216	0.0260706
ZNF689	1.08668	1.0032	1.17712	0.0415292
DENND5A	1.04449	1.0089	1.08135	0.0138608
NPLOC4	1.04716	1.0167	1.07853	0.00221705
CSNK1G2	1.03125	1.01624	1.04649	3.92367e-05
PECAM1	1.02192	1.01184	1.0321	1.8183e-05
CENPF	1.04436	1.00752	1.08254	0.0178409
ZDHHC8	1.0805	1.03898	1.12368	0.000107708
SH2B3	1.08695	1.0442	1.13146	4.644e-05
RNF31	1.05606	1.00879	1.10554	0.0195577
PFKL	1.0235	1.01171	1.03544	8.56523e-05
MSN	1.00711	1.00145	1.01281	0.0138238
SH3KBP1	1.06263	1.01909	1.10804	0.00443388
G6PD	1.0358	1.01511	1.0569	0.000631695
MMP2	1.00511	1.00015	1.0101	0.0434629
NPRL3	1.06465	1.02919	1.10134	0.000289386
RNASEH2A	1.02408	1.00226	1.04638	0.0303963
ANLN	1.05662	1.01613	1.09873	0.00573606
MCUB	1.11572	1.03819	1.19903	0.00288307
CARS1	1.06794	1.01104	1.12804	0.0186158
TMEM200A	1.08648	1.00533	1.17418	0.0362435
KXD1	1.03989	1.01155	1.06902	0.00552178
SH3BP5	1.11357	1.03389	1.19939	0.00451291
CAPN15	1.07686	1.0367	1.11858	0.000134054
KIFC1	1.04032	1.01204	1.06939	0.00494012
MMD	1.06556	1.01186	1.12212	0.0160991
SQSTM1	1.0091	1.00261	1.01564	0.00596786
OLFML2B	1.03758	1.0169	1.05867	0.00032842
APH1A	1.00561	1.00088	1.01036	0.0201342
SUPT7L	1.07418	1.02422	1.12656	0.00322814
GPR137B	1.01582	1.00342	1.02837	0.0122233
TIE1	1.09531	1.04847	1.14425	4.4614e-05
ADAP2	1.19554	1.09444	1.30597	7.43563e-05
BRD9	1.0843	1.00025	1.17541	0.049284
SNRPG	1.01374	1.00027	1.02741	0.045633
HDAC3	1.03743	1.00895	1.06671	0.00967049
CYTH3	1.0132	1.00018	1.0264	0.046975
CSRNP2	1.05023	1.00936	1.09275	0.0155146
VAT1	1.00484	1.00211	1.00758	0.000512696
DONSON	1.1551	1.08354	1.2314	9.94123e-06
SCAF4	1.05101	1.01178	1.09176	0.0103681
SFRP2	1.00509	1.00202	1.00817	0.00114858
TCF19	1.05012	1.00926	1.09263	0.0157171
TMX2P1	1.05719	1.00356	1.11369	0.0362733
STK35	1.03821	1.00932	1.06793	0.00920597
POLA2	1.11249	1.01768	1.21613	0.0189965
VIM	1.00426	1.00226	1.00628	3.10568e-05
TACC3	1.03954	1.01116	1.06872	0.00603971
ATP13A1	1.02646	1.00583	1.04752	0.011705
RECQL	1.04382	1.00354	1.08571	0.0326816
MARCKS	1.00468	1.00146	1.0079	0.00432863
BRD3OS	1.06911	1.01589	1.12512	0.0103124
POSTN	1.01092	1.00451	1.01737	0.000823516
TMEM250	1.03173	1.01147	1.05239	0.00202177
TBP	1.0535	1.00482	1.10454	0.0308209
ELL	1.11366	1.04661	1.18501	0.000679004
SFRP4	1.00293	1.00104	1.00483	0.00243159
COMMD10	0.977027	0.95609	0.998421	0.0354731
APBA3	1.19403	1.07577	1.32528	0.000860352
TK1	1.00867	1.00198	1.01541	0.0110509
FAM193A	1.04827	1.00658	1.09169	0.0228136
ITGA11	1.05863	1.02682	1.09143	0.000251926
CLIC2	1.08344	1.01794	1.15316	0.0117728
ST3GAL1	1.04483	1.01893	1.0714	0.000616529
GINS1	1.09688	1.02827	1.17008	0.00501982
ZNF512B	1.04227	1.01644	1.06875	0.00122019
GTSE1	1.10498	1.04128	1.17258	0.000983784
CALCRL	1.03151	1.00734	1.05626	0.0103222
RASA3	1.06118	1.01762	1.1066	0.0054933
ARRB2	1.06376	1.03022	1.0984	0.000155922
DDX41	1.02457	1.00178	1.04788	0.0344418
ADGRL4	1.03389	1.01094	1.05736	0.00361607
ARL8A	1.01894	1.00871	1.02928	0.000269295
ASAP2	1.07326	1.01676	1.13289	0.0103944
TAF2	1.02232	1.00322	1.04178	0.0218045
RNASE6	1.03123	1.01523	1.04749	0.000116304
MED30	1.06602	1.02381	1.10997	0.00192407
ASNS	1.03705	1.01781	1.05666	0.000140647
APLNR	1.05741	1.01946	1.09677	0.0027607
PEAR1	1.2233	1.11613	1.34077	1.64301e-05
AZGP1	0.999672	0.999399	0.999946	0.0188307
CDH5	1.06353	1.03379	1.09412	2.07355e-05
JPT1	1.0129	1.00402	1.02185	0.00431158
PSRC1	1.10584	1.02806	1.18949	0.00685566
DNPEP	1.02043	1.00066	1.04059	0.0427422
TEDC2	1.10702	1.03496	1.1841	0.0030692
PKP3	1.01098	1.00192	1.02012	0.0174818
CD163	1.04492	1.0175	1.07309	0.00120265
ENY2	1.05145	1.02501	1.07858	0.000112859
LSAMP-AS1	0.863962	0.767002	0.973178	0.0160569
SS18L1	1.03653	1.00067	1.07368	0.04582
MASTL	1.08291	1.01183	1.15898	0.0214824
GDPD5	1.13069	1.03991	1.2294	0.00402297
AGK	1.0492	1.001	1.09973	0.0453318
ARHGAP17	1.14733	1.06965	1.23065	0.000121808
MTHFD1L	1.04165	1.02196	1.06173	2.79434e-05
DIO2	1.01842	1.00237	1.03472	0.024285
NRROS	1.16077	1.08412	1.24284	1.89139e-05
FAM171B	1.04619	1.01405	1.07935	0.00456109
CIZ1	1.01472	1.00105	1.02857	0.0346987
CTSC	1.05109	1.01678	1.08656	0.00325338
THBS2	1.00749	1.00245	1.01256	0.00356936
TSPAN5	1.06282	1.02009	1.10734	0.00361446
NUP42	1.05205	1.0167	1.08863	0.0036139
GIMAP2	1.05202	1.00872	1.09719	0.0180507
DNMT3A	1.06876	1.01503	1.12533	0.0115033
ARHGEF6	1.07377	1.0168	1.13392	0.010492
IGBP1	0.992464	0.98579	0.999183	0.0279832
LOXL2	1.08001	1.0423	1.1191	2.19616e-05
FAM83D	1.01285	1.0019	1.02393	0.0212921
ABCB6	1.12714	1.02363	1.24112	0.0148889
LRWD1	1.12712	1.06075	1.19764	0.000111243
NDST1	1.0188	1.00573	1.03203	0.00468999
ZNF250	1.13513	1.03626	1.24344	0.00641175
MRPS25	1.04124	1.0066	1.07707	0.0192225
NCF2	1.08846	1.0435	1.13536	8.20833e-05
LTBP2	1.01342	1.0034	1.02355	0.0085866
GIMAP6	1.0529	1.01988	1.08698	0.00151744
B4GALNT4	1.01667	1.0082	1.0252	0.000106657
FYN	1.09531	1.03975	1.15383	0.000609134
ADRM1	1.00734	1.00002	1.01471	0.0492875
CPXM2	1.01538	1.00407	1.02681	0.00757458
GTF2IRD1	1.05571	1.00086	1.11356	0.046418
MAML1	1.03588	1.00003	1.07301	0.0498334
KLC2	1.02734	1.00732	1.04777	0.00724116
NEK11	1.10355	1.02797	1.18468	0.0064876
WDR5	1.02955	1.01443	1.04489	0.000114323
MBOAT7	1.02262	1.0089	1.03652	0.00117417
EMD	1.01834	1.00868	1.02809	0.000185533
PRR14	1.08076	1.05225	1.11003	1.23146e-08
RAB11FIP3	1.03579	1.02254	1.04921	8.67515e-08
LIG1	1.06628	1.02231	1.11214	0.00281779
SETD1A	1.04857	1.00302	1.09619	0.036358
SPINDOC	1.09564	1.05816	1.13444	2.69317e-07
RGS19	1.08078	1.04847	1.11408	5.23723e-07
CPVL	1.02542	1.00077	1.05068	0.0432145
DNAJC2	1.03919	1.00443	1.07514	0.0267637
VPS29	1.01675	1.00012	1.03366	0.0483051
KIAA0930	1.05337	1.00929	1.09937	0.0171196
PIP5K1A	1.02168	1.0049	1.03875	0.0111553
MMRN2	1.04179	1.01485	1.06945	0.00219604
MXRA8	1.01539	1.0075	1.02334	0.000124818
SNAPIN	1.01899	1.0026	1.03564	0.0229556
SRGAP2	1.17276	1.0933	1.25799	8.50536e-06
SH3BP2	1.15197	1.08468	1.22345	4.09503e-06
SRRT	1.02115	1.01007	1.03235	0.000169414
TPI1	1.00182	1.00004	1.00361	0.0452636
KCTD15	1.03905	1.01414	1.06457	0.00197329
SLC7A7	1.14714	1.07865	1.21998	1.24019e-05
FAP	1.07561	1.00993	1.14555	0.0233687
MEX3D	1.02503	1.00872	1.04161	0.00252493
SULF1	1.00663	1.0016	1.01169	0.00974341
IL18BP	1.0521	1.01341	1.09228	0.00789586
CENPU	1.03252	1.00417	1.06168	0.0242814
ARHGAP39	1.06571	1.02774	1.10508	0.000584816
CNIH4	1.04511	1.00707	1.0846	0.0196977
RFTN1	1.03941	1.01612	1.06323	0.00082713
FBRS	1.02871	1.00806	1.04978	0.00621746
PUF60	1.00776	1.00029	1.01529	0.0418213
ECM2	1.05169	1.00788	1.0974	0.0202453
SPNS2	1.12346	1.05266	1.19903	0.000456523
ADPGK-AS1	0.833565	0.728165	0.954221	0.00830628
POC1A	1.0597	1.01518	1.10618	0.00809535
HAVCR2	1.12225	1.06104	1.18701	5.57632e-05
NDUFAF6	1.09676	1.03555	1.16159	0.00162107
DERL1	1.01634	1.00041	1.03253	0.0444115
ABHD4	1.03005	1.01213	1.04829	0.000946371
GPR153	1.08978	1.02586	1.15769	0.00530636
SCRIB	1.01206	1.00462	1.01956	0.00144793
RAD51AP1	1.05836	1.00006	1.12005	0.0497409
STK10	1.09996	1.04222	1.16089	0.000533527
INHBA	1.02516	1.00687	1.04379	0.00681613
ELN	1.0067	1.00093	1.0125	0.0226803
MS4A7	1.09933	1.06165	1.13835	1.0283e-07
LAMA4	1.04438	1.01118	1.07867	0.00841877
MORC2	1.03916	1.00579	1.07363	0.021073
TROAP	1.11261	1.05544	1.17287	7.34309e-05
ZNF746	1.12355	1.03619	1.21827	0.00479106
FSCN1	1.05722	1.03333	1.08167	1.8364e-06
COPS5	1.03175	1.00986	1.05411	0.00427558
NOM1	1.10675	1.01079	1.21183	0.0283864
COL5A1	1.02598	1.01314	1.03897	6.54984e-05
GCNT2	0.978979	0.960684	0.997623	0.0273013
SKP2	1.05072	1.00594	1.09749	0.0259706
LZTS1	1.26238	1.15599	1.37855	2.13531e-07
ELOVL6	1.03291	1.00202	1.06475	0.0366005
HIKESHI	1.06481	1.02357	1.10771	0.00183393
RAPGEF1	1.02766	1.00976	1.04588	0.002344
POTEH	0.904901	0.833293	0.982662	0.0175124
RHEB	1.01789	1.00214	1.03389	0.0258114
GIMAP4	1.01957	1.00509	1.03426	0.00792588
MRPL20-AS1	1.04964	1.01718	1.08314	0.00250491
GPSM1	1.04164	1.01811	1.06571	0.000465905
GIT1	1.0298	1.00545	1.05474	0.0161563
ZNF706	1.03081	1.01317	1.04876	0.000571868
C11orf95	1.12955	1.04864	1.21672	0.00131747
E2F1	1.03797	1.01259	1.06399	0.00317098
C1QC	1.0055	1.00293	1.00806	2.56964e-05
DOCK11	1.09612	1.01558	1.18304	0.0184181
USP21	1.04992	1.01508	1.08596	0.00466542
ASAP1	1.05435	1.01042	1.1002	0.0148053
ZNF740	1.05849	1.01323	1.10578	0.0107976
ABCA2	1.0202	1.00703	1.03355	0.00255899
HSPG2	1.00529	1.00148	1.00912	0.00641509
CMAHP	1.19122	1.11335	1.27453	3.91078e-07
SEPTIN8	1.03951	1.01163	1.06816	0.00521233
RHOJ	1.07277	1.02275	1.12523	0.00393547
OSBPL10	1.07849	1.03641	1.12227	0.000198149
DNASE1L1	1.0721	1.02738	1.11877	0.00136303
NR2C1	1.17393	1.07388	1.28331	0.000418203
MTF2	1.1086	1.02425	1.1999	0.0106713
GLIS2	1.05113	1.01466	1.08891	0.00564098
LRRC25	1.16217	1.08151	1.24884	4.2176e-05
TULP3	1.04279	1.00747	1.07933	0.0171409
PHLDB2	1.03451	1.00856	1.06112	0.00885166
NFS1	1.05855	1.00091	1.11951	0.0463973
CMTM7	1.05146	1.00371	1.10149	0.034349
ARHGEF2	1.09444	1.0455	1.14567	0.000110346
ASPH	1.03623	1.0032	1.07034	0.0312872
DPYSL2	1.02894	1.0017	1.05692	0.0371871
NUP54	1.02494	1.0022	1.0482	0.0314176
SNRPF	1.016	1.0003	1.03195	0.045706
STRA6	1.05771	1.02224	1.09441	0.00126369
CCNG1	0.995174	0.991401	0.99896	0.0125274
WNK2	1.01083	1.00008	1.0217	0.0483497
VSIG2	0.995134	0.990717	0.99957	0.0315928
AEBP1	1.00294	1.00147	1.00442	9.28283e-05
PRR7	1.05913	1.02542	1.09396	0.000499908
RNF34	1.04549	1.01433	1.07762	0.00396232
POLA1	1.07586	1.00695	1.14949	0.0303833
SLC45A3	0.999668	0.99938	0.999956	0.0240379
MAN2A2	1.03237	1.0024	1.06323	0.0340742
ZNF326	1.11089	1.00995	1.22191	0.0304871
MAPK7	1.10569	1.02458	1.19321	0.00974282
INTS8	1.02962	1.00658	1.05319	0.0114658
MFGE8	1.01345	1.00528	1.02168	0.0012112
SSH1	1.06908	1.00371	1.1387	0.0379934
WNT7B	1.0236	1.0053	1.04223	0.011273
TGM2	1.00216	1.00091	1.00342	0.000710397
GRINA	1.00166	1.00015	1.00318	0.0313153
RARA	1.03701	1.00923	1.06554	0.00870436
BEND3	1.0746	1.02286	1.12895	0.00426402
MRPL39	0.975712	0.953962	0.997957	0.0325387
TMEM184B	1.03434	1.01643	1.05256	0.000151755
PGS1	1.15277	1.07457	1.23665	7.28773e-05
CNPY4	1.07128	1.02305	1.12177	0.00339255
MREG	1.10679	1.0195	1.20156	0.0154911
FLT4	1.17867	1.09262	1.27149	2.13669e-05
SHMT1	1.06265	1.0058	1.1227	0.0303005
TRAPPC9	1.04841	1.00995	1.08834	0.0131678
BMP1	1.11618	1.04173	1.19595	0.00180449
PLCB3	1.05729	1.03235	1.08283	4.79675e-06
MUS81	1.11883	1.06639	1.17385	4.54839e-06
ZNF764	1.11348	1.05647	1.17356	6.09872e-05
SLC26A11	1.05811	1.02303	1.0944	0.00102561
SULF2	1.0272	1.0059	1.04895	0.0120606
VASH1	1.15538	1.10128	1.21214	3.56852e-09
SLC52A2	1.01063	1.00165	1.0197	0.0202646
MID1IP1	1.01063	1.00218	1.01915	0.0136047
ZNF786	1.12228	1.03916	1.21206	0.00330033
S1PR1	1.02768	1.00765	1.0481	0.00654409
EPHB4	1.00894	1.00091	1.01704	0.0290942
CTNNAL1	1.01332	1.00604	1.02066	0.000324078
TEK	1.06483	1.00617	1.12691	0.0297889
CENPW	1.03672	1.00401	1.0705	0.0274687
FOXM1	1.02112	1.00264	1.03994	0.0248738
CDR2	1.0295	1.00426	1.05538	0.021694
TAOK2	1.05702	1.02732	1.08758	0.000137074
VWF	1.00912	1.00351	1.01477	0.0014204
MCCC1	1.01244	1.00151	1.02348	0.0255611
ARIH2	1.07518	1.03543	1.11645	0.000162337
PKMYT1	1.09887	1.03173	1.17037	0.00337509
SPP1	1.00548	1.00126	1.00972	0.0108418
C1orf115	0.994192	0.989541	0.998865	0.0149048
CLEC14A	1.03618	1.01775	1.05495	0.000103871
LINC01926	0.936096	0.889029	0.985654	0.0121089
HJURP	1.05006	1.00992	1.0918	0.014046
GEMIN8	1.05066	1.00812	1.09499	0.0191037
UQCC1	1.10519	1.03259	1.1829	0.00391182
MIS18A	1.03929	1.00693	1.07268	0.0169307
ETS1	1.01449	1.00071	1.02846	0.0392171
PHLDB1	1.1329	1.06062	1.2101	0.000207498
TRPV2	1.10085	1.04655	1.15798	0.000197186
TMEM130	1.04569	1.01656	1.07566	0.0019398
ARL6IP1	1.00399	1.00044	1.00756	0.0274032
CABIN1	1.03845	1.00414	1.07393	0.0277436
CENPA	1.07178	1.01353	1.13338	0.0150389
CYYR1	1.03554	1.00303	1.06911	0.031892
HMGB3	1.03153	1.01276	1.05064	0.00091985
SBF1	1.02845	1.00857	1.04872	0.00484864
NFATC2IP	1.0557	1.02474	1.08761	0.000358847
ARHGAP31	1.08845	1.01716	1.16473	0.0141897
ZBED5	1.05858	1.00958	1.10996	0.0185522
ABCB1	1.05058	1.00185	1.10169	0.0417256
DLGAP4	1.03701	1.00355	1.07159	0.0298723
EXT1	1.0742	1.01595	1.13578	0.0118574
MSL1	1.01781	1.00188	1.03398	0.02824
NOS3	1.08309	1.04646	1.121	5.42825e-06
GRK5	1.11414	1.01197	1.22663	0.0276328
AQP1	1.00482	1.00091	1.00876	0.0157761
ZSWIM4	1.15168	1.08897	1.218	7.66935e-07
USP36	1.042	1.00532	1.08003	0.0244594
RNF19A	1.02455	1.00896	1.04038	0.00193011
SLC7A4	0.926372	0.884186	0.970571	0.00129954
FMNL1	1.08416	1.04606	1.12364	9.55008e-06
RAP2C	1.0501	1.00533	1.09687	0.0278762
MAPK9	1.0412	1.00367	1.08013	0.0311188
ANKRD13B	1.08266	1.0383	1.12891	0.000198323
TNIP1	1.02218	1.00437	1.04031	0.0144543
MARK3	1.10209	1.04287	1.16466	0.000561069
MYEF2	1.07913	1.00509	1.15862	0.0357418
PLEKHF2	1.02077	1.00188	1.04001	0.0309943
TECRP1	0.897277	0.821552	0.979982	0.0159757
MYO18A	1.05166	1.00966	1.0954	0.0154231
IQCB1	1.0346	1.00851	1.06135	0.00903344
GAL3ST4	1.16374	1.0854	1.24774	2.00456e-05
C2orf15	1.10775	1.01378	1.21044	0.0236676
PDGFB	1.12352	1.07909	1.16978	1.53822e-08
DGKZ	1.08568	1.05026	1.1223	1.19034e-06
KANSL3	1.04597	1.00264	1.09117	0.0373117
RXRB	1.03128	1.0058	1.0574	0.0158325
MRGBP	1.12405	1.0762	1.17402	1.37209e-07
POLR2K	1.00883	1.00124	1.01648	0.0225855
GIMAP8	1.09955	1.04508	1.15687	0.00025144
FAM91A1	1.01795	1.00025	1.03597	0.0468842
PRELP	1.00491	1.00041	1.00943	0.032548
KIF7	1.09229	1.04313	1.14378	0.000171996
BRPF1	1.07276	1.01314	1.13589	0.0160724
LOXL1	1.0398	1.015	1.06521	0.00153176
PTPN23	1.01894	1.00161	1.03657	0.032077
TPPP	1.05708	1.00966	1.10673	0.0177723
ODF2	1.02968	1.01381	1.04579	0.000223228
NOL4L	1.13262	1.05745	1.21315	0.000379456
GTF2B	0.969161	0.939802	0.999437	0.0459522
DDX39A	1.0262	1.00876	1.04393	0.00309472
AXL	1.02433	1.00836	1.04055	0.00270721
TSC2	1.03479	1.01275	1.0573	0.00184571
STK4	1.04942	1.00346	1.09749	0.0347487
ESAM	1.04006	1.02256	1.05785	5.69185e-06
HOPX	1.05555	1.01775	1.09475	0.00366812
CNKSR3	1.05626	1.01207	1.10237	0.0120716
SLC6A6	1.08565	1.02978	1.14456	0.00230025
DAZAP1	1.06951	1.03778	1.1022	1.22382e-05
PLEKHG1	1.15553	1.06184	1.2575	0.000806033
AC129926.1	0.928667	0.874264	0.986455	0.0162733
FCHSD2	1.04633	1.00487	1.08951	0.0281139
C3AR1	1.05543	1.02611	1.08559	0.000174557
TM4SF18	1.03127	1.00912	1.0539	0.00544163
SLCO2B1	1.0842	1.0441	1.12584	2.619e-05
PCNX3	1.03255	1.0108	1.05476	0.00318427
HSF4	1.01271	1.0016	1.02394	0.0247705
NUP85	1.09425	1.04345	1.14753	0.000204633
IFT81	1.09985	1.01096	1.19656	0.0268565
SLC10A3	1.02888	1.00276	1.05568	0.030005
NFRKB	1.02987	1.00042	1.0602	0.0468096
PMS2P1	1.04051	1.01947	1.062	0.000139374
FUCA2	0.986159	0.975497	0.996937	0.0119687
TIAM1	1.08491	1.03469	1.13757	0.000750823
ZBTB7A	1.03291	1.0001	1.0668	0.0492698
GLB1L3	0.980673	0.96185	0.999865	0.0484225
PIK3C2B	1.05655	1.00059	1.11565	0.0475857
RIN3	1.11515	1.02848	1.20912	0.00828484
ARPC1B	1.0139	1.00819	1.01965	1.68261e-06
ARHGEF11	1.03582	1.0073	1.06515	0.0134994
LY96	1.04818	1.02178	1.07526	0.000299669
LHFPL2	1.06337	1.00712	1.12276	0.0267008
GPR34	1.05128	1.0149	1.08895	0.00537984
PLXNB3	1.03581	1.01372	1.05838	0.00137637
FGD5	1.10454	1.03282	1.18124	0.00369999
SPTAN1	1.02001	1.00605	1.03417	0.00484709
MYCT1	1.07862	1.01584	1.14529	0.0133799
PITPNM1	1.06608	1.02022	1.11399	0.00433878
POLR3E	1.0376	1.0028	1.07361	0.033945
TRAF3	1.05726	1.0082	1.10871	0.0216347
GPNMB	1.00736	1.00299	1.01175	0.000952015
SLC37A3	1.03369	1.00354	1.06474	0.0282216
DVL1	1.01066	1.00277	1.01862	0.00804852
RABL2B	1.12228	1.03069	1.22202	0.00791373
PFKP	1.01475	1.00586	1.02372	0.00110371
FBH1	1.02941	1.00446	1.05499	0.0205754
FARP2	1.06567	1.00374	1.13141	0.037324
ITGBL1	1.05132	1.01607	1.08778	0.00401964
P4HA2	1.06001	1.00143	1.12201	0.0445248
PRICKLE3	1.17054	1.04816	1.30722	0.00519503
CD34	1.04518	1.01704	1.07411	0.00150905
EPB41L2	1.04409	1.0019	1.08807	0.0403715
SLC19A2	1.01626	1.00337	1.02931	0.0132577
PLS3	1.02851	1.00725	1.05023	0.00836037
SLIT3	1.05508	1.00005	1.11313	0.049769
CASKIN2	1.04613	1.00922	1.08439	0.0138536
ST3GAL2	1.14521	1.04699	1.25264	0.00303894
OTUD6B	1.03322	1.00567	1.06152	0.0177684
TBC1D25	1.085	1.01487	1.15999	0.016722
CNOT3	1.02774	1.00271	1.0534	0.0296147
ZXDC	1.05874	1.01645	1.1028	0.0060633
PTK7	1.00524	1.00085	1.00966	0.0193401
AKAP8	1.05746	1.02522	1.09071	0.000405825
PPP1R18	1.02605	1.01042	1.04193	0.00102432
COL8A2	1.03776	1.00897	1.06737	0.00983035
FCER1G	1.01796	1.00936	1.02663	3.93324e-05
ADAMTSL2	1.03244	1.011	1.05433	0.00286406
KBTBD6	0.946027	0.899461	0.995003	0.0312027
MSC	1.06249	1.01369	1.11365	0.0115206
PHF13	1.03461	1.00344	1.06675	0.0292551
CXorf38	1.09613	1.01066	1.18884	0.0267025
TRAM1	1.00342	1.00021	1.00664	0.0370344
STAU2	1.02217	1.00032	1.0445	0.0466734
DOT1L	1.11279	1.04531	1.18463	0.000813499
CMKLR1	1.11734	1.0574	1.18068	8.02467e-05
ACVRL1	1.07957	1.03451	1.12658	0.00043201
VCAN	1.0145	1.00341	1.02571	0.0102672
TRIM14	1.01938	1.00928	1.02958	0.000158381
VARS2	1.08462	1.02118	1.152	0.00825293
CD38	0.985598	0.973361	0.997988	0.022855
TP53	0.986342	0.974194	0.99864	0.0296181
CBLB	1.08537	1.00304	1.17445	0.0418086
SLC15A3	1.09825	1.05755	1.14051	1.14646e-06
EOLA2	1.08413	1.0277	1.14365	0.00305578
PHF21A	1.07699	1.01239	1.14572	0.0187759
MVP	1.01402	1.0033	1.02485	0.0102263
TREM2	1.03715	1.02294	1.05156	2.17737e-07
GAS7	1.10619	1.02797	1.19037	0.00699589
SHANK3	1.10581	1.06325	1.15008	5.10991e-07
CC2D1B	1.10667	1.04327	1.17393	0.000759876
CTHRC1	1.00716	1.00097	1.01339	0.023265
GIMAP7	1.02123	1.00661	1.03606	0.00430843
SNAP47	1.0587	1.00331	1.11716	0.0374943
OSBPL8	1.01718	1.0049	1.0296	0.00596042
PDAP1	1.00666	1.00326	1.01007	0.000121245
SIRPA	1.03691	1.00907	1.06552	0.00905175
ITGB5	1.01351	1.00353	1.02359	0.00786198
MFNG	1.09411	1.04893	1.14123	2.90939e-05
CHTOP	1.02402	1.00162	1.04691	0.0354502
PBX2	1.0235	1.00332	1.0441	0.0222696
TONSL	1.10717	1.04488	1.17317	0.000568519
MAU2	1.05571	1.0135	1.09968	0.00921614
CABLES2	1.17566	1.09277	1.26485	1.43791e-05
CKS2	1.00434	1.0001	1.00859	0.0449222
TPP1	0.99335	0.98701	0.99973	0.0410977
NR2C2AP	1.02944	1.00848	1.05084	0.00570985
APTX	1.05882	1.0172	1.10215	0.0052179
CRY1	1.04993	1.01284	1.08837	0.00791842
CD93	1.02023	1.00748	1.03314	0.00180428
FAM83H	1.0099	1.00318	1.01667	0.0038144
HGH1	1.01145	1.00007	1.02296	0.0486699
LAIR1	1.1315	1.06342	1.20393	9.52883e-05
TSPAN17	1.06131	1.03335	1.09003	1.25201e-05
HHEX	1.09135	1.02059	1.16702	0.01059
B4GALT4	1.05133	1.00051	1.10473	0.0476702
MFAP2	1.03584	1.0074	1.06507	0.0131582
LURAP1L	1.02123	1.00107	1.0418	0.0389549
PLAAT3	1.0102	1.00436	1.01608	0.000606504
SCAP	1.01923	1.00453	1.03413	0.0101613
SH3BP5L	1.04036	1.00088	1.0814	0.0450239
MCM7	1.01094	1.00377	1.01817	0.00275187
SEPTIN5	1.03458	1.01008	1.05967	0.00543074
PKN3	1.20539	1.11156	1.30714	6.24271e-06
VSIG10	1.06307	1.00659	1.12271	0.0281144
FJX1	1.09074	1.04151	1.1423	0.000228069
COL18A1	1.02843	1.01632	1.04069	3.49738e-06
PIR	1.05311	1.0275	1.07937	3.80844e-05
TIMM8AP1	0.992149	0.985512	0.998832	0.0213769
LRRC32	1.02839	1.01303	1.04397	0.000265073
AC072052.1	1.05323	1.01212	1.09602	0.01069
MATN3	1.13805	1.06684	1.214	8.75821e-05
CEP131	1.08985	1.04575	1.1358	4.45055e-05
CARMIL1	1.0461	1.00132	1.09288	0.04347
RNASE1	1.0106	1.00488	1.01635	0.000271705
FKBP15	1.0668	1.00719	1.12994	0.0275061
GDI1	1.00986	1.00386	1.0159	0.00124799
NFYA	1.02132	1.00237	1.04063	0.02726
RCSD1	1.06011	1.00806	1.11485	0.0230682
KRI1	1.04935	1.01194	1.08814	0.00930447
PRPF38B	1.02899	1.00784	1.05058	0.00699608
TRIM47	1.04065	1.00913	1.07315	0.0111187
CXCL16	1.01274	1.00135	1.02425	0.0282214
HEY1	1.18994	1.09725	1.29047	2.6367e-05
FLOT1	1.0074	1.00208	1.01276	0.00641195
MRC2	1.01497	1.00032	1.02983	0.0451816
NELFB	1.01042	1.00225	1.01866	0.0123297
ARHGEF40	1.0723	1.02386	1.12303	0.00307703
AL929601.3	0.972369	0.94795	0.997417	0.0308302
SPAG1	1.06739	1.03272	1.10321	0.000108095
GOLGA1	1.04924	1.00492	1.09551	0.029063
GMPR	0.996839	0.993987	0.9997	0.0303577
YKT6	1.01601	1.00596	1.02616	0.00174265
SPSB1	1.0201	1.00644	1.03394	0.00382291
RAB32	1.01977	1.00301	1.0368	0.0205677
CCDC92	1.08972	1.0169	1.16776	0.0148971
SAP30	1.04743	1.01597	1.07987	0.00290286
UNC93B1	1.04357	1.01692	1.07093	0.00123334
ZNF768	1.01683	1.00574	1.02804	0.00286396
MAFG	1.04626	1.00711	1.08692	0.0201094
CDC37	1.01295	1.00623	1.01972	0.000153411
TENT4A	1.09348	1.04961	1.13917	1.88581e-05
SERPINE2	1.05106	1.02502	1.07776	9.99511e-05
LAPTM5	1.00543	1.00192	1.00895	0.00242284
ZNF282	1.02934	1.00609	1.05312	0.0131155
CSF1R	1.02556	1.00973	1.04163	0.00146796
TANC1	1.01884	1.00352	1.03438	0.0157524
RGS5	1.00634	1.00317	1.00951	8.46744e-05
SLC12A8	1.04639	1.00797	1.08626	0.0175033
PRR12	1.02402	1.00108	1.04748	0.0400242
SPI1	1.03737	1.02201	1.05296	1.43839e-06
TYROBP	1.00989	1.00551	1.01429	9.03643e-06
ZNF696	1.07791	1.02386	1.13481	0.00426056
COL5A2	1.00713	1.00039	1.0139	0.0379743
ZNF621	1.07325	1.00599	1.14502	0.0322994
CDKN2B	1.05415	1.01277	1.09722	0.00984434
STAB1	1.06538	1.03813	1.09335	1.66026e-06
BNIP2	1.04291	1.00458	1.08271	0.0278626
MIR3936HG	1.06045	1.00529	1.11864	0.0312869
MRRF	1.07982	1.02012	1.14302	0.00813478
RFLNB	1.03721	1.00029	1.07549	0.0481721
ZNF646	1.07141	1.00578	1.14131	0.0324511
CSF1	1.03209	1.00551	1.05938	0.0176494
SETD5	1.02319	1.00281	1.04398	0.0255518
NASP	1.05353	1.02651	1.08127	8.38689e-05
CDC25B	1.05281	1.02437	1.08204	0.000230569
AURKB	1.04986	1.00552	1.09615	0.0271043
MMP14	1.00764	1.00083	1.01451	0.0279052
GREB1	0.991717	0.984001	0.999494	0.0368816
HLA-DPA1	1.0066	1.00325	1.00997	0.000111076
MAFB	1.03801	1.0215	1.05479	5.0929e-06
VCAM1	1.03266	1.00126	1.06503	0.0413387
EZH2	1.10947	1.04607	1.17672	0.000539701
MAFG-DT	1.07093	1.0272	1.11652	0.00127411
KRIT1	1.03997	1.00014	1.08138	0.049183
NUDT16	1.02148	1.00223	1.0411	0.0285928
CLEC16A	1.12343	1.02736	1.22848	0.010721
PACS2	1.12778	1.07863	1.17917	1.22607e-07
SLC43A3	1.18612	1.08855	1.29244	9.73423e-05
COL10A1	1.00919	1.00146	1.01698	0.0197675
CCP110	1.08026	1.01434	1.15046	0.0162485
CD4	1.01944	1.0067	1.03234	0.00269597
ITGA4	1.07675	1.00199	1.15708	0.0439944
NRF1	1.10031	1.01065	1.19792	0.0275086
DUSP12	1.05719	1.01619	1.09984	0.00585145
SBK1	1.02882	1.0119	1.04602	0.0007847
RPRD1B	1.0177	1.00403	1.03157	0.0110185
HMGN2P46	0.998248	0.996683	0.999815	0.0284593
CD86	1.09235	1.03577	1.15201	0.00113315
NPTX2	1.09602	1.04085	1.15411	0.000502848
ARHGAP29	1.03173	1.00648	1.05761	0.0134785
DIPK2B	1.07542	1.02513	1.12817	0.00292334
SLA	1.07045	1.01744	1.12622	0.00860587
DYRK2	1.0648	1.01012	1.12245	0.0195783
ZC3H3	1.03939	1.01426	1.06514	0.00197262
KAT8	1.05042	1.01188	1.09042	0.00990275
ZNF7	1.0943	1.03658	1.15523	0.00111547
MTMR14	1.06292	1.00601	1.12305	0.0297642
METTL1	1.03619	1.00165	1.07193	0.0398569
FANCG	1.0736	1.02433	1.12525	0.00305013
CTSS	1.01075	1.00335	1.01821	0.0043467
DUS3L	1.06786	1.03059	1.10647	0.000291506
TM4SF1	1.00264	1.0001	1.00519	0.0416583
MARK1	1.10125	1.01096	1.1996	0.0271228
NLGN2	1.06877	1.03593	1.10265	2.95613e-05
ZNF263	1.07032	1.02748	1.11494	0.00111101
FXYD5	1.01578	1.00301	1.02871	0.0152678
FPGS	1.01791	1.00197	1.0341	0.027482
RCN3	1.02732	1.01178	1.0431	0.000527867
RMDN3	1.03509	1.00149	1.06983	0.0405382
DRG2	1.09376	1.02867	1.16297	0.00419697
ITGB2	1.02128	1.01002	1.03267	0.000197278
MRTFA	1.05564	1.00786	1.10568	0.0219464
CUL7	1.01377	1.00002	1.02772	0.0497403
IFI16	1.02372	1.00465	1.04314	0.0145235
MYO15B	1.03828	1.01419	1.06294	0.00170857
ARL6IP6	1.06453	1.00681	1.12556	0.0279104
STK11IP	1.10747	1.03997	1.17935	0.00146462
PPP2R5B	1.09504	1.05824	1.13311	1.92747e-07
DHX16	1.04098	1.0108	1.07205	0.00745076
RASSF2	1.03727	1.01702	1.05794	0.000276163
CDC26	1.05857	1.01592	1.10302	0.0066786
CEBPG	1.0351	1.00733	1.06364	0.0129098
SLC39A13	1.06401	1.03953	1.08906	1.74262e-07
SELP	1.03437	1.00604	1.0635	0.0170875
PRR3	1.09762	1.0226	1.17815	0.00991513
SLC26A6	1.03952	1.0085	1.07149	0.0121608
TMEM150A	1.03858	1.00236	1.0761	0.0366308
CHST11	1.06255	1.00512	1.12328	0.0323604
DUT	1.02234	1.00429	1.04071	0.0150769
GRIPAP1	1.07831	1.03991	1.11814	4.60791e-05
REXO2	1.00538	1.00201	1.00877	0.00175551
CAPN13	1.08348	1.00622	1.16667	0.0336558
LTBP3	1.02049	1.00857	1.03255	0.000717761
CDK5RAP1	1.13463	1.06406	1.20988	0.000115701
LRFN4	1.02729	1.00113	1.05414	0.0407893
ZNF320	1.04895	1.00295	1.09706	0.0367263
LINC01963	1.1001	1.03189	1.17283	0.00348918
ZBTB45	1.04448	1.00176	1.08902	0.0410999
AC007114.1	0.960015	0.931126	0.9898	0.00885436
TNFRSF1B	1.02272	1.00949	1.03612	0.000720064
PLXNA1	1.06812	1.0336	1.10378	8.41782e-05
CEP170B	1.04423	1.02731	1.06144	2.09308e-07
AP4M1	1.04931	1.01039	1.08973	0.0125629
KIF3C	1.12886	1.06698	1.19433	2.50845e-05
RFC4	1.06178	1.01403	1.11178	0.0106643
TINCR	0.931307	0.883255	0.981973	0.00846332
SLCO2A1	1.01622	1.00581	1.02674	0.00219156
PFDN2	1.00463	1.00099	1.00828	0.0126067
LPIN1	1.11326	1.01867	1.21663	0.0178753
FKBP10	1.00311	1.0003	1.00593	0.0298994
CDK18	1.1047	1.0211	1.19514	0.0131343
DLL4	1.05485	1.02384	1.08679	0.000451627
NUMBL	1.09549	1.03943	1.15458	0.000667247
GJA4	1.04919	1.024	1.07499	0.000107411
RNF149	1.03602	1.00437	1.06868	0.0253966
SMPD4	1.03338	1.00055	1.06729	0.046255
DDA1	1.09023	1.03789	1.1452	0.000578732
TOX2	1.03037	1.00102	1.06058	0.0424755
C1QB	1.00492	1.00217	1.00769	0.0004607
C1orf52	1.12779	1.05389	1.20686	0.000504734
CARD19	1.12031	1.06433	1.17924	1.40235e-05
HAUS5	1.1434	1.06268	1.23025	0.000333768
WIPF1	1.02898	1.00012	1.05867	0.0490541
CRTC2	1.04385	1.01924	1.06905	0.000421569
STK19	1.13189	1.04259	1.22883	0.00312939
ZNF823	1.10387	1.02391	1.19007	0.0100027
CLCN7	1.05107	1.01996	1.08313	0.00115713
COL16A1	1.02393	1.00959	1.03848	0.00101422
HRH1	1.06281	1.01269	1.11539	0.0134395
LILRB4	1.09373	1.05535	1.13352	8.86492e-07
FAM102A	1.02765	1.012	1.04355	0.000496594
LRFN1	1.06336	1.00242	1.12802	0.0413383
IFT172	1.0772	1.01382	1.14454	0.0162298
SEMA4C	1.03625	1.01167	1.06142	0.00364114
IQANK1	1.00767	1.00159	1.01378	0.0132942
NDUFA4L2	1.05289	1.03038	1.0759	2.95612e-06
CD300A	1.15493	1.0826	1.23209	1.27116e-05
MAP4K2	1.09192	1.0179	1.17132	0.0140778
FRY	1.1015	1.0258	1.18278	0.00778509
UBB	1.00084	1.00007	1.0016	0.0316678
TYK2	1.05023	1.02444	1.07667	0.000111764
DCXR	0.998485	0.997315	0.999657	0.0113303
BRD8	1.0305	1.00262	1.05915	0.0317677
CLIP2	1.09524	1.04116	1.15213	0.000430023
HMGB2	1.00578	1.00037	1.01123	0.0363186
DLG3	1.03426	1.00058	1.06907	0.0461103
HMOX1	1.0205	1.00964	1.03148	0.00020213
ACP3	0.999823	0.999711	0.999935	0.00189912
AEN	0.948265	0.906216	0.992265	0.0217027
SRSF11	1.01246	1.00039	1.02468	0.0430203
ZG16B	0.995361	0.990962	0.999781	0.0396828
BCAS1	0.979251	0.965215	0.993492	0.00442128
EWSR1	1.01566	1.00025	1.0313	0.0463226
SH2D3C	1.12267	1.06273	1.18601	3.58342e-05
ANGPT2	1.04998	1.01905	1.08185	0.00138873
ZHX3	1.04723	1.01888	1.07636	0.000980067
FGD1	1.11972	1.0676	1.17438	3.32262e-06
COMP	1.00353	1.0017	1.00537	0.000160705
MDC1	1.05158	1.00425	1.10115	0.0323039
GTPBP2	1.07366	1.03744	1.11113	4.91082e-05
ZNF777	1.04545	1.00897	1.08325	0.0141786
KMT2B	1.05914	1.02532	1.09408	0.00052074
LDB2	1.05851	1.00339	1.11666	0.0371581
EVI2A	1.04926	1.00809	1.09211	0.0185525
PCGF1	1.06554	1.00865	1.12564	0.0233466
AC091230.1	1.05138	1.01327	1.09091	0.00781173
FBXO6	1.0459	1.02495	1.06728	1.37933e-05
XDH	1.06805	1.01398	1.12501	0.013001
CA2	1.05753	1.02941	1.08642	4.74426e-05
PCOTH	0.984772	0.972678	0.997017	0.0149443
THEM4	1.07385	1.00838	1.14358	0.0264282
FOXS1	1.08971	1.04524	1.13608	5.32057e-05
SCN1B	1.06539	1.01181	1.12181	0.0161335
WDR90	1.09822	1.06132	1.1364	7.7437e-08
CCR1	1.1071	1.0399	1.17866	0.00145122
LPGAT1	1.00981	1.0028	1.01686	0.0059955
TIGD5	1.07912	1.02623	1.13473	0.00297912
ARPC5L	1.02559	1.00298	1.04872	0.0263309
CTNND2	1.0496	1.01115	1.08951	0.0110093
MAP2K7	1.04977	1.00684	1.09453	0.0226019
LY86	1.05247	1.02159	1.08428	0.000763937
FGL2	1.02062	1.00316	1.03839	0.0204182
IGFBP3	1.00466	1.00164	1.00769	0.00244487
ATG2A	1.04847	1.00777	1.09082	0.019137
HTRA1	1.00658	1.00038	1.01281	0.0373325
SIN3B	1.07317	1.03784	1.1097	3.5496e-05
SSBP4	1.02458	1.01379	1.03548	6.96443e-06
TOR1A	1.02178	1.00463	1.03922	0.0126175
TPT1	0.99912	0.998531	0.999709	0.00341172
FBXO9	1.02994	1.00362	1.05695	0.0255118
NKAIN1	1.00486	1.00041	1.00932	0.0322298
CELSR3	1.09499	1.03553	1.15786	0.00144456
PLPPR2	1.00899	1.00266	1.01537	0.00530367
MLLT1	1.01319	1.00089	1.02563	0.0354723
SIPA1	1.02603	1.00561	1.04687	0.0122493
CSDC2	1.05096	1.01957	1.08332	0.00131659
UBAC1	1.037	1.01086	1.06382	0.00528435
ZYX	1.00569	1.0013	1.01009	0.0109397
FAM76B	1.05694	1.00109	1.11591	0.0455698
TP53INP1	1.00367	1.00057	1.00679	0.0202124
AC007405.4	1.04227	1.00454	1.08142	0.0277604
DMWD	1.07576	1.00814	1.14792	0.0274852
AC074212.1	1.04128	1.00011	1.08415	0.0493914
APOE	1.00136	1.00074	1.00198	1.65407e-05
CDA	1.05884	1.00993	1.11013	0.0178151
CES5AP1	1.03403	1.0127	1.0558	0.00164688
PLVAP	1.00513	1.00253	1.00775	0.000110743
RAI1	1.03901	1.00871	1.07022	0.0112625
ZNF467	1.03274	1.01661	1.04913	6.02341e-05
MAPRE3	1.02535	1.00846	1.04252	0.00313147
MED15	1.05268	1.00078	1.10726	0.0465688
SSR1	0.987471	0.975506	0.999583	0.0426541
MTG2	1.09286	1.04401	1.14398	0.000141036
PISD	1.05652	1.0024	1.11357	0.0404262
MYO9B	1.06518	1.03204	1.09939	9.01598e-05
OPTN	1.01911	1.0027	1.03579	0.022318
SRGN	1.00374	1.00063	1.00687	0.0184165
FOLR2	1.03142	1.00608	1.05739	0.0147657
ARAP1	1.02907	1.00349	1.0553	0.0256388
RWDD3	1.07521	1.01508	1.13891	0.0135199
UBE2G2	1.0378	1.0184	1.05756	0.000115785
IQCE	1.04445	1.00751	1.08274	0.017933
TCERG1	1.05192	1.00783	1.09794	0.0205044
ACIN1	1.02683	1.0066	1.04746	0.00910749
MRI1	1.03775	1.01112	1.06509	0.00521726
ELP1	1.02592	1.00132	1.05113	0.038775
CD53	1.01014	1.00254	1.0178	0.00880296
OSGEP	1.08095	1.02279	1.14242	0.00580282
TMC6	1.03742	1.01599	1.0593	0.00056099
APBB1IP	1.07663	1.02657	1.12913	0.00237207
DLG4	1.07328	1.01569	1.13414	0.0119666
ABI3	1.07925	1.04029	1.11968	4.79837e-05
LCP2	1.0661	1.02059	1.11364	0.00403591
MED27	1.0355	1.00023	1.07201	0.0484818
GRB10	1.03845	1.00777	1.07006	0.0136578
OPLAH	1.02648	1.01144	1.04174	0.000518672
CERCAM	1.02755	1.00042	1.05542	0.0465375
TNRC18	1.0149	1.00227	1.0277	0.0206399
ALDOA	1.00119	1.00045	1.00193	0.00158735
NCKAP5L	1.09234	1.00844	1.18321	0.0302954
FBRSL1	1.03021	1.00124	1.06001	0.0408108
FAM174B	0.993269	0.98704	0.999537	0.035362
CMTR1	1.03926	1.0109	1.06841	0.00637206
PNPLA6	1.0753	1.04112	1.11059	1.05665e-05
SENP5	1.07517	1.00273	1.15284	0.0417035
SLC16A3	1.17749	1.10649	1.25305	2.62286e-07
DGAT2	1.12133	1.06551	1.18008	1.10551e-05
TFRC	1.02762	1.00512	1.05061	0.0158447
IFITM3	1.00108	1.00051	1.00164	0.000183611
