# Supplementary material for: Roles of m5C RNA Modification Patterns in Biochemical Recurrence and Tumor Microenvironment Characterization of Prostate Adenocarcinoma
Source: Front Immunol. 2022 May 4;13:869759. doi: 10.3389/fimmu.2022.869759 (PMC9114358; doi:10.3389/fimmu.2022.869759)
Supplement: Supplementary file 12 [file Table_6.xlsx]

## Sheet: Sheet1
Supplemental table 6: Multivariate COX analysis on the candidate genes for constructing m5C modification signature.
id	HR	HR.95L	HR.95H	pvalue
FLII	1.01422	1.00282	1.02576	0.0143918
PPP1R9B	1.0162	1.00022	1.03243	0.0468869
TMEM132A	1.01387	1.0041	1.02373	0.005287
TFE3	1.0392	1.01422	1.0648	0.00195208
CLSTN3	1.02824	1.01168	1.04507	0.000775226
ENG	1.00847	1.00328	1.01369	0.00134692
CDK16	1.03638	1.01122	1.06216	0.00437192
TTYH3	1.01249	1.00289	1.02218	0.0106283
SLC5A6	1.03009	1.0003	1.06077	0.0476783
WRAP73	1.14236	1.00223	1.30209	0.0462246
AMPD2	1.04172	1.00145	1.08361	0.0421539
TGFBI	1.01821	1.00192	1.03476	0.0282956
PLCG1	1.03551	1.01012	1.06154	0.00586751
SAMHD1	1.01161	1.00004	1.0233	0.0491226
MGAT4B	1.02037	1.00637	1.03456	0.00422009
GMIP	1.04324	1.00213	1.08604	0.0390507
CPNE1	1.01326	1.00449	1.02211	0.00297227
PLEKHM2	1.02143	1.0024	1.04083	0.0271573
GRAMD1A	1.01267	1.00275	1.02268	0.0121959
BGN	1.0009	1.0001	1.0017	0.0269916
PODXL	1.01273	1.0002	1.02541	0.0464764
VAV2	1.01738	1.00031	1.03475	0.0459123
KCNAB2	1.12016	1.02753	1.22114	0.00997526
CTSZ	1.00383	1.00041	1.00726	0.0279803
NSMF	1.01657	1.00494	1.02833	0.0051158
FBXL19	1.04226	1.0058	1.08003	0.0226994
TXNL1	0.951459	0.907696	0.997331	0.0383397
IFNAR2	1.08394	1.00189	1.17272	0.0447495
NOTCH3	1.014	1.00138	1.02679	0.0295915
DOCK6	1.14153	1.06419	1.2245	0.000217484
RALGDS	1.01198	1.00084	1.02324	0.0350486
RIPOR1	1.02143	1.00037	1.04294	0.0460394
RFX1	1.07213	1.00329	1.1457	0.039697
USF2	1.01652	1.00385	1.02936	0.0104406
FCGR2A	1.07436	1.02163	1.12981	0.00521891
TGFB1	1.01842	1.005	1.03202	0.00701116
ARAP3	1.06649	1.01259	1.12326	0.0149859
PLXND1	1.03955	1.01234	1.06749	0.00415522
PHTF1	1.18326	1.06176	1.31866	0.00233351
MDH1	0.981259	0.966608	0.996132	0.013704
SLC12A7	1.02158	1.0084	1.03493	0.00127148
MS4A6A	1.0399	1.00528	1.07571	0.0235241
FMNL3	1.12801	1.03149	1.23356	0.00830803
MGRN1	1.02925	1.00187	1.05738	0.0361012
PLXDC1	1.1718	1.05217	1.30504	0.00390773
CMTM3	1.02152	1.00193	1.04149	0.0311386
HDAC7	1.04837	1.01542	1.08239	0.00373872
DENND4B	1.04269	1.00573	1.081	0.0231837
RHBDF2	1.09939	1.01953	1.1855	0.0137912
MS4A4A	1.04748	1.00163	1.09544	0.0422409
VSIG4	1.03292	1.00116	1.06569	0.0420929
DCAF15	1.05928	1.01056	1.11035	0.0165179
PIK3R3	1.03014	1.00282	1.05821	0.0303734
SLC6A8	1.01806	1.0022	1.03417	0.0254386
NAA40	1.07647	1.01345	1.1434	0.016664
FPR3	1.0392	1.00194	1.07784	0.0390321
MTA1	1.02472	1.00178	1.04818	0.0345161
MAPKAPK2	1.01542	1.00369	1.02729	0.00985354
CSNK1G2	1.01842	1.00294	1.03414	0.0194804
PECAM1	1.01224	1.00116	1.02344	0.0302797
ZDHHC8	1.05661	1.01405	1.10095	0.00865599
SH2B3	1.05563	1.00972	1.10363	0.0170229
PFKL	1.01483	1.00321	1.02658	0.0122363
G6PD	1.02317	1.0023	1.04447	0.0293452
NPRL3	1.03976	1.00511	1.0756	0.024148
CAPN15	1.04336	1.00256	1.08582	0.0370091
TIE1	1.05383	1.00734	1.10246	0.0227585
VIM	1.00303	1.00093	1.00514	0.00460136
TMEM250	1.02367	1.00245	1.04534	0.0286305
COMMD10	0.972077	0.950772	0.99386	0.012255
APBA3	1.12039	1.00801	1.24531	0.0350471
ARRB2	1.04057	1.0046	1.07783	0.0267172
RNASE6	1.01939	1.00276	1.0363	0.022127
PEAR1	1.12757	1.02184	1.24425	0.0168478
CDH5	1.03575	1.00408	1.06842	0.0266119
ARHGAP17	1.08097	1.00239	1.16572	0.0431888
MTHFD1L	1.02456	1.00276	1.04682	0.0270141
NRROS	1.14128	1.04818	1.24266	0.00233744
LOXL2	1.05115	1.00984	1.09415	0.0147446
LRWD1	1.09072	1.01882	1.16771	0.0125698
NCF2	1.06171	1.01537	1.11016	0.00853858
PRR14	1.04988	1.01904	1.08166	0.00137758
RAB11FIP3	1.01912	1.00374	1.03472	0.0146038
SPINDOC	1.06944	1.02968	1.11073	0.000513937
RGS19	1.06806	1.02823	1.10942	0.000683424
KIAA0930	1.05107	1.00275	1.10171	0.0380517
MXRA8	1.00909	1.00011	1.01815	0.047254
SRGAP2	1.08565	1.00055	1.17798	0.0484665
SH3BP2	1.08604	1.01758	1.1591	0.0129745
SRRT	1.01212	1.00097	1.02339	0.0330485
SLC7A7	1.11111	1.02907	1.19969	0.00709805
HAVCR2	1.07135	1.00513	1.14192	0.0342332
STK10	1.07293	1.00519	1.14523	0.0343799
MS4A7	1.06524	1.02443	1.10767	0.00151875
FSCN1	1.04265	1.0131	1.07306	0.00441429
LZTS1	1.20664	1.09233	1.3329	0.000216282
MRPL20-AS1	1.03797	1.00528	1.07173	0.0224761
C1QC	1.00351	1.00062	1.00642	0.0174076
CMAHP	1.12364	1.04216	1.21149	0.00240498
OSBPL10	1.04474	1.00046	1.09099	0.0476384
LRRC25	1.12139	1.03613	1.21366	0.00451395
ARHGEF2	1.07056	1.01457	1.12964	0.0128514
CCNG1	0.995825	0.99192	0.999746	0.0369269
AEBP1	1.00162	1.00004	1.00321	0.0450948
PRR7	1.03545	1.00061	1.0715	0.0460844
TGM2	1.00216	1.00085	1.00347	0.00123346
RARA	1.03009	1.00134	1.05965	0.0400689
MRPL39	0.972856	0.950976	0.995241	0.0177403
TMEM184B	1.02632	1.00608	1.04696	0.010581
PGS1	1.08977	1.0096	1.17631	0.0274551
FLT4	1.09922	1.00828	1.19837	0.0317927
BMP1	1.08179	1.01014	1.15852	0.0245494
PLCB3	1.03699	1.00895	1.06582	0.00941068
MUS81	1.05926	1.00225	1.11951	0.0413895
VASH1	1.14539	1.07995	1.21481	6.12513e-06
EPHB4	1.00807	1.00058	1.01562	0.0345963
TAOK2	1.03666	1.0048	1.06952	0.0237715
ARIH2	1.04049	1.0019	1.08057	0.0395658
CLEC14A	1.01915	1.00016	1.0385	0.048084
PHLDB1	1.08101	1.00934	1.15776	0.0260389
TRPV2	1.08376	1.02284	1.1483	0.00642768
CABIN1	1.03716	1.00214	1.07341	0.0373645
NOS3	1.07336	1.03277	1.11555	0.000319031
ZSWIM4	1.09999	1.035	1.16907	0.00216189
FMNL1	1.06237	1.01589	1.11098	0.00804002
ANKRD13B	1.04751	1.00214	1.09493	0.0398983
TNIP1	1.02142	1.0033	1.03987	0.0203065
GAL3ST4	1.12663	1.03595	1.22524	0.00535132
PDGFB	1.08485	1.03396	1.13824	0.000891704
DGKZ	1.06245	1.02359	1.10278	0.00143929
MRGBP	1.0754	1.02235	1.13122	0.00486017
GIMAP8	1.05502	1.0006	1.11241	0.0474792
NOL4L	1.10387	1.01376	1.20198	0.0229389
GTF2B	0.959877	0.929215	0.991551	0.013429
AXL	1.01831	1.0017	1.0352	0.0306147
ESAM	1.02402	1.005	1.0434	0.0130723
DAZAP1	1.0392	1.00622	1.07326	0.019467
PLEKHG1	1.09844	1.00084	1.20556	0.047978
C3AR1	1.03721	1.00609	1.06928	0.0187306
TM4SF18	1.02631	1.00208	1.05113	0.0331216
SLCO2B1	1.05509	1.01319	1.09872	0.00949289
HSF4	1.02157	1.00899	1.03431	0.000737712
TIAM1	1.08466	1.03067	1.14148	0.00180978
ARPC1B	1.01102	1.00477	1.01731	0.000535239
PLXNB3	1.02322	1.00003	1.04696	0.0497474
PFKP	1.01104	1.0022	1.01996	0.0142472
PRICKLE3	1.13453	1.01394	1.26947	0.027704
ST3GAL2	1.12995	1.02099	1.25055	0.0182043
FCER1G	1.01187	1.002	1.02184	0.0183205
KBTBD6	0.9493	0.902789	0.998206	0.0423544
CMKLR1	1.0714	1.00471	1.14251	0.0354319
ACVRL1	1.05012	1.00469	1.0976	0.0302232
SLC15A3	1.09162	1.04244	1.14312	0.000193693
MVP	1.01268	1.0018	1.02367	0.0221855
TREM2	1.02783	1.01129	1.04464	0.00091289
SHANK3	1.07727	1.0301	1.12659	0.00112059
SIRPA	1.03463	1.00592	1.06417	0.0177409
MFNG	1.06897	1.01647	1.12417	0.00943651
CABLES2	1.09466	1.00266	1.19511	0.0434522
TPP1	0.992722	0.985811	0.999682	0.0404437
CD93	1.01348	1.00022	1.02692	0.0462798
LAIR1	1.0878	1.01026	1.1713	0.0257236
TSPAN17	1.0421	1.01349	1.07152	0.00368982
PLAAT3	1.00654	1.00034	1.01278	0.0385382
PKN3	1.12187	1.02823	1.22404	0.00971027
FJX1	1.07793	1.02604	1.13245	0.0028726
COL18A1	1.0239	1.01052	1.03744	0.000430036
LRRC32	1.01783	1.00184	1.03406	0.0286515
CEP131	1.05291	1.00758	1.10028	0.0216733
RNASE1	1.00658	1.00046	1.01273	0.0349251
HEY1	1.09942	1.00206	1.20623	0.0451274
ARHGEF40	1.05314	1.00167	1.10724	0.0428252
SAP30	1.0376	1.00679	1.06935	0.0163827
UNC93B1	1.0277	1.00135	1.05475	0.0392639
CDC37	1.00879	1.00195	1.01569	0.0117446
TENT4A	1.05888	1.00827	1.11204	0.0220482
CSF1R	1.02221	1.00461	1.04013	0.0131938
RGS5	1.00429	1.00062	1.00797	0.0217477
SPI1	1.03428	1.01626	1.05261	0.000169912
TYROBP	1.00648	1.00176	1.01123	0.00710409
STAB1	1.05068	1.0197	1.08259	0.00120547
MIR3936HG	1.05868	1.00054	1.1202	0.0478551
CSF1	1.0284	1.0004	1.05718	0.046781
HLA-DPA1	1.00457	1.00053	1.00862	0.0265111
MAFB	1.02402	1.00546	1.04291	0.010968
PACS2	1.08667	1.03721	1.13849	0.000470815
SLC43A3	1.15548	1.05026	1.27123	0.00300938
NPTX2	1.07155	1.01416	1.13219	0.0138634
CTSS	1.00866	1.00001	1.01738	0.0497012
DUS3L	1.04374	1.00716	1.08166	0.0186904
NLGN2	1.04694	1.01256	1.08249	0.00708673
DRG2	1.05951	1.00012	1.12242	0.0495082
ITGB2	1.01718	1.00375	1.03078	0.01198
MYO15B	1.03205	1.00661	1.05813	0.0132193
STK11IP	1.07605	1.00936	1.14715	0.0247441
PPP2R5B	1.05909	1.01626	1.10374	0.00642191
RASSF2	1.02352	1.00115	1.0464	0.0392525
SLC39A13	1.05075	1.02345	1.07878	0.000228261
SELP	1.02894	1.00043	1.05825	0.0465884
GRIPAP1	1.04493	1.00824	1.08295	0.0159443
LINC01963	1.06646	1.0025	1.13449	0.0414313
TNFRSF1B	1.01661	1.00155	1.03189	0.0305568
CEP170B	1.02857	1.01064	1.04681	0.00169402
KIF3C	1.07071	1.00299	1.14301	0.0403975
SLCO2A1	1.01415	1.00399	1.0244	0.00621257
NUMBL	1.06669	1.01161	1.12477	0.0170037
GJA4	1.02714	1.00066	1.05433	0.0444972
DDA1	1.06074	1.00398	1.12071	0.0355852
CRTC2	1.0314	1.00357	1.06	0.0267399
CLCN7	1.03242	1.00241	1.06333	0.0340128
COL16A1	1.01637	1.00123	1.03173	0.0339458
LILRB4	1.06975	1.02289	1.11876	0.00317321
FAM102A	1.0201	1.00228	1.03824	0.026883
SEMA4C	1.03586	1.01037	1.062	0.00557548
NDUFA4L2	1.03607	1.01083	1.06195	0.0048607
CD300A	1.11345	1.03416	1.19883	0.00435877
TYK2	1.03397	1.00909	1.05946	0.00719531
CLIP2	1.085	1.02508	1.14841	0.00488368
HMOX1	1.01755	1.00409	1.03119	0.0104386
SH2D3C	1.07936	1.01655	1.14605	0.0125452
FGD1	1.07427	1.01981	1.13165	0.00695994
COMP	1.00251	1.00026	1.00476	0.0288139
GTPBP2	1.04614	1.00778	1.08596	0.0179631
KMT2B	1.03623	1.0025	1.0711	0.035033
AC091230.1	1.05247	1.01174	1.09483	0.0110964
FBXO6	1.02622	1.00409	1.04884	0.0199783
CA2	1.04033	1.00911	1.07252	0.0109889
WDR90	1.04968	1.00968	1.09128	0.0144586
CCR1	1.08176	1.00714	1.16189	0.0311461
LY86	1.03982	1.00329	1.07768	0.0323406
SIN3B	1.04785	1.01094	1.08611	0.0106366
SSBP4	1.01824	1.00639	1.03022	0.00246188
SIPA1	1.02221	1.00058	1.04431	0.0441298
ZYX	1.00459	1.00009	1.00912	0.0456353
AC074212.1	1.04666	1.00068	1.09475	0.0466482
APOE	1.00138	1.00059	1.00217	0.00060133
CES5AP1	1.05027	1.02453	1.07666	0.000107159
PLVAP	1.00317	1.0004	1.00596	0.0251236
MTG2	1.0504	1.0028	1.10027	0.0377124
MYO9B	1.06194	1.02803	1.09698	0.000284592
UBE2G2	1.02212	1.00173	1.04294	0.0333496
TMC6	1.0247	1.00226	1.04765	0.0307899
ABI3	1.0654	1.02298	1.10958	0.00224312
NCKAP5L	1.09042	1.00488	1.18325	0.0378196
PNPLA6	1.05811	1.02357	1.09381	0.000849686
SLC16A3	1.16057	1.08155	1.24537	3.49104e-05
DGAT2	1.06465	1.00196	1.13127	0.0430498
IFITM3	1.00101	1.00039	1.00163	0.00137092
