# Supplementary material for: Roles of m5C RNA Modification Patterns in Biochemical Recurrence and Tumor Microenvironment Characterization of Prostate Adenocarcinoma
Source: Front Immunol. 2022 May 4;13:869759. doi: 10.3389/fimmu.2022.869759 (PMC9114358; doi:10.3389/fimmu.2022.869759)
Supplement: Supplementary file 14 [file Table_8.xlsx]

## Sheet: Sheet1
Supplemental table 8: The risk score of each sample in the TCGA-PRAD cohort
id	riskScore	risk
TCGA-VP-AA1N	2.28322	low
TCGA-XK-AAIW	2.93949	high
TCGA-ZG-A9L5	2.7749	high
TCGA-G9-7522	1.39862	low
TCGA-J4-A67N	4.05357	high
TCGA-HC-A6AL	2.71584	high
TCGA-EJ-8469	3.69445	high
TCGA-EJ-A46D	2.06246	low
TCGA-G9-6367	0.0566154	low
TCGA-VP-A87E	2.29677	low
TCGA-HC-A4ZV	4.20474	high
TCGA-G9-6373	1.88211	low
TCGA-G9-6370	0.559712	low
TCGA-KK-A7AP	2.982	high
TCGA-YL-A8HL	2.21848	low
TCGA-EJ-5518	2.48947	high
TCGA-HC-A632	2.27411	low
TCGA-EJ-5532	1.06186	low
TCGA-CH-5791	2.62348	high
TCGA-V1-A9OT	3.1585	high
TCGA-CH-5740	1.83334	low
TCGA-V1-A8MK	1.72174	low
TCGA-EJ-7331	1.94874	low
TCGA-G9-6377	0.887293	low
TCGA-EJ-5525	3.09175	high
TCGA-CH-5751	4.54983	high
TCGA-CH-5753	2.25242	low
TCGA-EJ-A8FS	0.0669035	low
TCGA-HC-7080	2.79842	high
TCGA-J9-A52E	3.13098	high
TCGA-HC-A9TE	3.88594	high
TCGA-X4-A8KS	1.15701	low
TCGA-CH-5788	1.04479	low
TCGA-G9-7510	1.79776	low
TCGA-TP-A8TT	2.30698	low
TCGA-HC-8256	1.41378	low
TCGA-VP-A876	1.75879	low
TCGA-YL-A8S8	3.75884	high
TCGA-VP-A87H	1.72656	low
TCGA-2A-A8VL	0.926254	low
TCGA-KK-A8I6	2.99666	high
TCGA-M7-A722	0.43455	low
TCGA-2A-A8VV	1.98811	low
TCGA-G9-6371	0.931185	low
TCGA-J4-A67K	2.75908	high
TCGA-EJ-7125	1.00345	low
TCGA-V1-A9OY	3.96665	high
TCGA-EJ-5521	1.58305	low
TCGA-EJ-5516	1.37571	low
TCGA-CH-5738	2.47671	high
TCGA-G9-7519	0.332527	low
TCGA-HC-7213	5.34304	high
TCGA-EJ-5505	-0.236688	low
TCGA-HC-7233	1.40464	low
TCGA-CH-5750	2.43624	high
TCGA-KK-A8IG	3.01515	high
TCGA-VP-A87B	2.46658	high
TCGA-G9-6384	1.00593	low
TCGA-EJ-8474	1.35615	low
TCGA-HC-A6AQ	2.00037	low
TCGA-XJ-A9DI	4.5507	high
TCGA-J4-A67O	1.58551	low
TCGA-KC-A7F5	3.49901	high
TCGA-J4-A6M7	2.26517	low
TCGA-G9-6339	1.47084	low
TCGA-XK-AAJU	2.3758	high
TCGA-EJ-5515	-0.535448	low
TCGA-J4-A6G3	4.21291	high
TCGA-SU-A7E7	3.2882	high
TCGA-G9-6343	0.714981	low
TCGA-HC-7075	-0.234921	low
TCGA-V1-A8WW	5.14538	high
TCGA-ZG-A9L6	3.03362	high
TCGA-HC-8213	-0.703199	low
TCGA-HC-7231	1.93716	low
TCGA-YL-A9WH	3.58948	high
TCGA-XK-AAJR	4.24868	high
TCGA-EJ-5524	1.99945	low
TCGA-KK-A6E1	3.54169	high
TCGA-EJ-5522	1.00563	low
TCGA-WW-A8ZI	2.22373	low
TCGA-G9-6348	0.562774	low
TCGA-VP-A87C	3.59994	high
TCGA-EJ-5514	2.53798	high
TCGA-EJ-7786	1.40894	low
TCGA-CH-5746	1.12034	low
TCGA-HC-7209	1.50218	low
TCGA-J4-A83J	1.69202	low
TCGA-KK-A8IA	2.6456	high
TCGA-EJ-7797	1.77089	low
TCGA-KK-A7AW	2.66884	high
TCGA-2A-A8W3	3.05596	high
TCGA-EJ-7788	2.16303	low
TCGA-EJ-A65F	3.34262	high
TCGA-G9-6338	1.69903	low
TCGA-V1-A8X3	2.07104	low
TCGA-HC-A8CY	3.94068	high
TCGA-VN-A88I	4.61939	high
TCGA-ZG-A9LU	2.75037	high
TCGA-XJ-A83H	1.04449	low
TCGA-EJ-7330	2.58935	high
TCGA-J4-A83K	2.53094	high
TCGA-EJ-7783	3.44547	high
TCGA-EJ-7317	1.18498	low
TCGA-CH-5741	0.688347	low
TCGA-EJ-5498	2.05602	low
TCGA-ZG-A9LY	3.07062	high
TCGA-YL-A9WK	3.14426	high
TCGA-KK-A8ID	2.63255	high
TCGA-G9-6369	0.0351186	low
TCGA-HC-7820	1.64744	low
TCGA-G9-6498	0.724766	low
TCGA-KK-A6E0	3.37431	high
TCGA-G9-7509	1.71173	low
TCGA-HC-7817	2.89839	high
TCGA-CH-5761	3.49817	high
TCGA-ZG-A8QZ	2.33182	high
TCGA-G9-6356	2.51876	high
TCGA-G9-6333	2.2443	low
TCGA-EJ-7794	2.35882	high
TCGA-ZG-A9LB	1.17086	low
TCGA-KC-A7FE	2.66599	high
TCGA-Y6-A9XI	3.30127	high
TCGA-EJ-A8FU	2.84983	high
TCGA-V1-A9ZR	3.58949	high
TCGA-V1-A9Z9	2.12507	low
TCGA-HC-7211	2.00643	low
TCGA-V1-A9O7	3.98531	high
TCGA-YL-A8SQ	4.4732	high
TCGA-EJ-7791	2.55694	high
TCGA-EJ-7328	3.55944	high
TCGA-HC-A6HX	3.08993	high
TCGA-YL-A8SO	2.11522	low
TCGA-KC-A4BL	3.53807	high
TCGA-YL-A8SH	2.56934	high
TCGA-HC-A76X	2.14727	low
TCGA-G9-6362	0.256612	low
TCGA-CH-5772	0.0303913	low
TCGA-FC-A5OB	-1.691	low
TCGA-QU-A6IP	1.77804	low
TCGA-VN-A88R	3.9777	high
TCGA-J4-A6G1	2.96463	high
TCGA-QU-A6IN	1.45482	low
TCGA-EJ-7325	1.90316	low
TCGA-VN-A88L	2.92858	high
TCGA-EJ-5501	2.2156	low
TCGA-CH-5768	0.794645	low
TCGA-EJ-5494	1.61369	low
TCGA-HC-7737	2.21279	low
TCGA-KK-A8IJ	1.66765	low
TCGA-HC-A9TH	4.47911	high
TCGA-CH-5765	1.31737	low
TCGA-KK-A6E5	2.09315	low
TCGA-EJ-5502	3.00813	high
TCGA-V1-A9Z8	2.21748	low
TCGA-KK-A7AV	3.30978	high
TCGA-EJ-5499	1.3503	low
TCGA-ZG-A9L1	3.21679	high
TCGA-CH-5769	3.07673	high
TCGA-G9-6378	0.475654	low
TCGA-FC-7708	2.63813	high
TCGA-KK-A6E3	1.54049	low
TCGA-EJ-A65E	1.29431	low
TCGA-EJ-7792	1.76659	low
TCGA-KK-A8I8	3.0202	high
TCGA-V1-A8WL	1.30916	low
TCGA-VN-A88O	1.9416	low
TCGA-HC-A6HY	2.63327	high
TCGA-KC-A4BR	3.03996	high
TCGA-YL-A9WJ	3.37081	high
TCGA-VN-A88N	1.98852	low
TCGA-HC-8261	2.56118	high
TCGA-J4-A67M	3.15276	high
TCGA-FC-A6HD	1.2194	low
TCGA-HC-A6AO	2.24335	low
TCGA-CH-5739	1.82971	low
TCGA-G9-6379	3.49224	high
TCGA-ZG-A9KY	4.40382	high
TCGA-G9-7523	2.00941	low
TCGA-CH-5771	3.75167	high
TCGA-V1-A9ZG	2.6525	high
TCGA-2A-A8VT	3.41522	high
TCGA-G9-6496	1.74785	low
TCGA-ZG-A8QX	0.347012	low
TCGA-EJ-5504	2.02551	low
TCGA-EJ-7123	1.31278	low
TCGA-HC-8258	1.75051	low
TCGA-HC-7744	2.20821	low
TCGA-M7-A71Y	1.73173	low
TCGA-EJ-A6RA	2.05171	low
TCGA-CH-5752	3.04579	high
TCGA-2A-A8VO	1.05972	low
TCGA-QU-A6IL	2.86262	high
TCGA-ZG-A9LS	2.6206	high
TCGA-G9-6329	1.41259	low
TCGA-KK-A7AY	0.596221	low
TCGA-CH-5762	1.73503	low
TCGA-KK-A7AU	3.27019	high
TCGA-YL-A9WI	0.509936	low
TCGA-XK-AAJT	2.91748	high
TCGA-EJ-A6RC	2.4944	high
TCGA-EJ-7784	2.4652	high
TCGA-FC-7961	3.77388	high
TCGA-EJ-A7NN	4.61794	high
TCGA-EJ-5506	0.735071	low
TCGA-EJ-7218	1.51782	low
TCGA-Y6-A8TL	1.229	low
TCGA-VN-A88K	4.10152	high
TCGA-EJ-7327	2.95268	high
TCGA-KC-A7FD	0.850847	low
TCGA-EJ-A46F	2.88537	high
TCGA-M7-A723	1.63208	low
TCGA-XK-AAJ3	3.08877	high
TCGA-KK-A7AZ	2.95305	high
TCGA-HC-7742	3.4702	high
TCGA-X4-A8KQ	3.36621	high
TCGA-J9-A8CN	0.890004	low
TCGA-YL-A8SJ	3.29355	high
TCGA-HC-A8D0	2.41918	high
TCGA-TK-A8OK	3.40635	high
TCGA-EJ-A65B	2.70031	high
TCGA-CH-5764	1.35359	low
TCGA-VN-A88M	1.88571	low
TCGA-EJ-5503	2.57563	high
TCGA-HI-7171	3.04415	high
TCGA-G9-6342	2.18557	low
TCGA-V1-A8WV	4.8328	high
TCGA-YL-A9WY	4.91914	high
TCGA-EJ-5507	1.93586	low
TCGA-M7-A725	2.96935	high
TCGA-HC-7230	2.63908	high
TCGA-J4-A67R	2.78683	high
TCGA-J9-A8CP	3.38827	high
TCGA-KK-A8IB	2.59751	high
TCGA-CH-5767	-0.383073	low
TCGA-EJ-5512	-0.133752	low
TCGA-KK-A6E8	0.35203	low
TCGA-M7-A71Z	1.83352	low
TCGA-ZG-A9L9	3.6866	high
TCGA-G9-A9S0	1.69702	low
TCGA-EJ-A65G	0.697541	low
TCGA-YL-A8SR	3.34083	high
TCGA-HC-7748	3.00611	high
TCGA-2A-AAYU	1.81605	low
TCGA-2A-A8W1	0.78383	low
TCGA-FC-A4JI	2.50625	high
TCGA-HC-7210	3.76005	high
TCGA-G9-6336	0.624688	low
TCGA-KK-A6E2	1.93338	low
TCGA-KK-A5A1	2.531	high
TCGA-EJ-A7NK	1.86948	low
TCGA-2A-AAYO	1.04495	low
TCGA-V1-A9ZI	5.85761	high
TCGA-G9-A9S4	3.14888	high
TCGA-KK-A7B0	2.69638	high
TCGA-J4-8198	1.92763	low
TCGA-HC-7819	1.65397	low
TCGA-HC-8259	1.34017	low
TCGA-EJ-5511	2.45752	high
TCGA-EJ-5495	3.17855	high
TCGA-ZG-A9L2	2.95863	high
TCGA-EJ-A7NJ	1.41038	low
TCGA-G9-6353	1.19547	low
TCGA-HC-7821	4.51074	high
TCGA-V1-A9OX	2.63693	high
TCGA-EJ-7782	3.62992	high
TCGA-V1-A8MG	3.23205	high
TCGA-XK-AAJP	2.27954	low
TCGA-EJ-A46I	2.13517	low
TCGA-G9-A9S7	2.78693	high
TCGA-HC-A76W	2.37668	high
TCGA-EJ-AB20	2.87384	high
TCGA-VP-A87D	2.05793	low
TCGA-M7-A724	2.57873	high
TCGA-HC-7212	3.76891	high
TCGA-J4-A83N	1.6227	low
TCGA-CH-5790	1.38134	low
TCGA-EJ-AB27	0.569721	low
TCGA-XA-A8JR	1.39817	low
TCGA-EJ-5509	2.5567	high
TCGA-VN-A943	-0.892785	low
TCGA-HC-7740	1.86016	low
TCGA-KK-A6E7	4.82158	high
TCGA-KK-A7B4	4.95107	high
TCGA-YL-A9WX	3.20623	high
TCGA-CH-5744	2.66455	high
TCGA-J4-AATZ	2.14791	low
TCGA-HC-8266	3.49604	high
TCGA-EJ-7781	1.66073	low
TCGA-KK-A8I9	4.32875	high
TCGA-YL-A8SA	2.46587	high
TCGA-HC-A6AN	2.64334	high
TCGA-HC-8262	0.743616	low
TCGA-EJ-A46B	1.78127	low
TCGA-KK-A59Y	2.63835	high
TCGA-EJ-8470	2.55752	high
TCGA-XK-AAIR	0.987099	low
TCGA-HC-7077	1.87866	low
TCGA-G9-6354	1.20781	low
TCGA-V1-A8WS	1.59885	low
TCGA-J4-A67Q	2.32741	high
TCGA-VN-A88Q	3.22224	high
TCGA-CH-5794	3.08404	high
TCGA-J4-A83L	0.765052	low
TCGA-G9-6351	0.580859	low
TCGA-VN-A88P	1.26025	low
TCGA-XK-AAJA	3.64418	high
TCGA-ZG-A9M4	2.73683	high
TCGA-HC-8264	2.57421	high
TCGA-H9-A6BX	3.62726	high
TCGA-V1-A8WN	2.13557	low
TCGA-KK-A8IL	2.96056	high
TCGA-J9-A8CK	3.56638	high
TCGA-TP-A8TV	2.29925	low
TCGA-J9-A52C	3.85668	high
TCGA-YL-A9WL	4.75441	high
TCGA-G9-6366	-0.873945	low
TCGA-HC-7078	2.89946	high
TCGA-KK-A8I7	4.44592	high
TCGA-EJ-5510	1.24862	low
TCGA-KK-A7B2	3.65657	high
TCGA-EJ-A46E	2.01181	low
TCGA-G9-7521	1.98248	low
TCGA-V1-A9OQ	0.495214	low
TCGA-G9-6364	1.18298	low
TCGA-HC-A631	1.68049	low
TCGA-J4-A67L	2.59995	high
TCGA-EJ-5530	2.73516	high
TCGA-QU-A6IO	2.88133	high
TCGA-VP-A879	2.81318	high
TCGA-V1-A9O5	5.6652	high
TCGA-VP-A878	4.31773	high
TCGA-KC-A7F6	3.26231	high
TCGA-KK-A8IK	2.82344	high
TCGA-XQ-A8TB	2.3204	high
TCGA-CH-5766	2.14651	low
TCGA-HC-A6AS	2.89507	high
TCGA-EJ-5531	1.76232	low
TCGA-EJ-7785	2.93439	high
TCGA-G9-6363	-0.074031	low
TCGA-M7-A720	1.48065	low
TCGA-KK-A8I5	1.91371	low
TCGA-EJ-7793	0.661814	low
TCGA-HC-7752	2.17939	low
TCGA-XJ-A83F	1.80427	low
TCGA-EJ-5508	1.75461	low
TCGA-KK-A7AQ	2.90662	high
TCGA-XK-AAIV	4.19275	high
TCGA-EJ-7315	2.27216	low
TCGA-J4-A83I	3.36531	high
TCGA-EJ-7312	2.2898	low
TCGA-EJ-A7NH	3.25845	high
TCGA-CH-5737	1.53501	low
TCGA-J9-A8CM	4.14693	high
TCGA-G9-6332	0.609445	low
TCGA-HC-7079	3.45824	high
TCGA-HC-7818	2.12903	low
TCGA-EJ-8472	2.14588	low
TCGA-HC-7232	3.02706	high
TCGA-V1-A8MU	4.17679	high
TCGA-XJ-A83G	2.14861	low
TCGA-HC-8265	2.76707	high
TCGA-KC-A7F3	1.43121	low
TCGA-YL-A8SI	2.9333	high
TCGA-YL-A8SC	4.88409	high
TCGA-G9-6365	1.4703	low
TCGA-H9-A6BY	1.78118	low
TCGA-J4-A67S	2.40087	high
TCGA-VP-A87J	1.31385	low
TCGA-CH-5763	1.0632	low
TCGA-ZG-A9NI	3.02514	high
TCGA-KK-A6E4	2.35346	high
TCGA-EJ-A7NF	1.58713	low
TCGA-KC-A4BN	0.729017	low
TCGA-J4-A83M	2.37724	high
TCGA-EJ-5517	-0.857046	low
TCGA-CH-5754	5.53096	high
TCGA-EJ-A46H	3.81769	high
TCGA-2A-AAYF	0.877415	low
TCGA-YL-A8HK	4.70469	high
TCGA-2A-A8VX	0.493827	low
TCGA-HC-A48F	3.67523	high
TCGA-FC-A66V	1.56424	low
TCGA-HC-7736	2.58232	high
TCGA-V1-A9O9	2.95062	high
TCGA-CH-5789	0.882814	low
TCGA-HC-A8D1	2.06822	low
TCGA-EJ-8468	1.6345	low
TCGA-V1-A9ZK	2.16203	low
TCGA-HC-8216	1.94331	low
TCGA-YL-A8SB	2.80266	high
TCGA-J4-AAU2	1.67439	low
TCGA-J9-A8CL	3.23985	high
TCGA-KK-A8I4	4.37433	high
TCGA-V1-A9OA	2.84938	high
TCGA-KK-A8IF	1.32731	low
TCGA-KK-A7B1	3.20014	high
TCGA-EJ-5527	1.17252	low
TCGA-ZG-A9LM	1.83387	low
TCGA-HC-7747	1.25855	low
TCGA-KK-A7B3	4.62187	high
TCGA-V1-A8ML	1.48277	low
TCGA-G9-6385	1.1364	low
TCGA-G9-6347	1.92065	low
TCGA-J4-A67T	1.06472	low
TCGA-ZG-A9L0	3.86017	high
TCGA-G9-6499	-0.0540424	low
TCGA-V1-A9OL	5.44204	high
TCGA-EJ-7789	2.6672	high
TCGA-ZG-A8QW	2.45854	high
TCGA-KK-A59X	2.2374	low
TCGA-M7-A721	2.42274	high
TCGA-EJ-7115	2.14966	low
TCGA-KK-A8IH	2.84523	high
TCGA-HI-7169	1.52855	low
TCGA-YL-A8HM	3.29885	high
TCGA-EJ-7318	2.45143	high
TCGA-MG-AAMC	0.350427	low
TCGA-YL-A8SL	2.90969	high
TCGA-G9-6361	1.42055	low
TCGA-KK-A8IM	2.59059	high
TCGA-EJ-A8FN	2.0946	low
TCGA-YL-A8SP	3.68474	high
TCGA-KC-A4BV	3.85588	high
TCGA-V1-A8MF	2.00514	low
TCGA-XJ-A9DQ	2.34321	high
TCGA-ZG-A9LN	3.12452	high
TCGA-KK-A6E6	2.53255	high
TCGA-CH-5748	0.422634	low
TCGA-CH-5743	1.88598	low
TCGA-KK-A8IC	3.11906	high
TCGA-KK-A59V	2.75598	high
TCGA-V1-A9OF	1.66853	low
TCGA-G9-7525	0.361927	low
TCGA-KK-A6DY	3.53856	high
TCGA-HC-8257	2.01857	low
TCGA-EJ-7321	0.467441	low
TCGA-YL-A8HJ	3.61624	high
TCGA-KK-A59Z	3.04223	high
TCGA-HC-7749	1.81017	low
TCGA-HC-A6AP	3.39543	high
TCGA-QU-A6IM	1.76824	low
TCGA-EJ-7314	1.34013	low
TCGA-J4-AATV	3.24163	high
TCGA-H9-7775	1.07514	low
TCGA-EJ-A65J	2.77099	high
TCGA-XK-AAK1	1.40284	low
TCGA-YL-A8S9	0.608583	low
TCGA-J4-8200	0.368748	low
TCGA-ZG-A9L4	3.01008	high
TCGA-ZG-A8QY	2.4891	high
TCGA-YL-A8SK	2.35227	high
TCGA-ZG-A9ND	1.66755	low
TCGA-EJ-5542	0.998871	low
TCGA-EJ-5526	1.61802	low
TCGA-ZG-A9LZ	2.45749	high
TCGA-EJ-A7NG	1.72697	low
TCGA-HC-8260	2.21078	low
TCGA-KC-A7FA	2.36012	high
TCGA-VP-A875	2.00548	low
TCGA-HC-7081	4.57036	high
TCGA-CH-5745	2.74344	high
TCGA-HI-7168	3.13916	high
TCGA-HC-7738	2.06376	low
TCGA-V1-A9OH	1.81463	low
TCGA-HC-7745	3.03942	high
TCGA-V1-A8MM	4.47926	high
TCGA-EJ-A65M	1.8534	low
TCGA-FC-A8O0	1.92431	low
TCGA-YL-A8HO	3.93443	high
TCGA-ZG-A9N3	2.92656	high
TCGA-ZG-A9MC	4.06009	high
TCGA-CH-5792	3.61677	high
TCGA-J9-A52B	4.41373	high
TCGA-EJ-5519	3.37757	high
TCGA-XJ-A9DK	2.32425	high
TCGA-V1-A9Z7	3.00951	high
TCGA-HC-7750	1.63783	low
TCGA-HI-7170	1.73673	low
TCGA-G9-6494	1.18742	low
