# Supplementary material for: Roles of m5C RNA Modification Patterns in Biochemical Recurrence and Tumor Microenvironment Characterization of Prostate Adenocarcinoma
Source: Front Immunol. 2022 May 4;13:869759. doi: 10.3389/fimmu.2022.869759 (PMC9114358; doi:10.3389/fimmu.2022.869759)
Supplement: Supplementary file 15 [file Table_9.xlsx]

## Sheet: Sheet1
Supplemental table 9: The risk score of each sample in the testing cohort
id	riskScore	risk
GSM1817720	6.99148	high
GSM1817721	6.86965	high
GSM1817722	6.2085	high
GSM1817723	5.68032	high
GSM1817724	6.00637	high
GSM1817725	7.48388	high
GSM1817726	5.06866	high
GSM1817727	5.20146	high
GSM1817729	6.94112	high
GSM1817730	4.90895	high
GSM1817731	6.30183	high
GSM1817732	6.22641	high
GSM1817733	6.40328	high
GSM1817734	7.04037	high
GSM1817735	5.0834	high
GSM1817736	5.23915	high
GSM1817737	6.01524	high
GSM1817738	5.29263	high
GSM1817739	6.85358	high
GSM1817740	6.38164	high
GSM1817741	5.15861	high
GSM1817742	6.73241	high
GSM1817743	6.47171	high
GSM1817744	6.03778	high
GSM1817745	6.48086	high
GSM1817746	6.63214	high
GSM1817747	6.44904	high
GSM1817748	5.02653	high
GSM1817749	7.33646	high
GSM1817750	6.71148	high
GSM1817751	5.00265	high
GSM1817752	5.38481	high
GSM1817753	6.74229	high
GSM1817754	6.28211	high
GSM1817755	4.64414	high
GSM1817756	5.90548	high
GSM1817757	6.51408	high
GSM1817758	7.19962	high
GSM1817759	5.62969	high
GSM1817760	7.11165	high
GSM1817761	5.28695	high
GSM1817762	5.29133	high
GSM1817763	6.23266	high
GSM1817764	4.51823	high
GSM1817765	5.75733	high
GSM1817766	5.07325	high
GSM1817767	6.25304	high
GSM1817768	7.68543	high
GSM1817769	7.41186	high
GSM1817770	7.03073	high
GSM1817771	8.33547	high
GSM1817772	7.3538	high
GSM1817773	6.62493	high
GSM1817774	7.47531	high
GSM1817775	5.81768	high
GSM1817776	5.76213	high
GSM1817777	7.65681	high
GSM1817778	6.49584	high
GSM1817779	6.39261	high
GSM1817780	6.62276	high
GSM1817781	6.71373	high
GSM1817782	6.09318	high
GSM1817783	6.80994	high
GSM1817784	4.99039	high
GSM1817785	5.87923	high
GSM1817786	6.65742	high
GSM1817787	5.90925	high
GSM1817788	6.58208	high
GSM1817789	6.4903	high
GSM1817790	6.102	high
GSM1817791	6.45525	high
GSM1817792	6.52278	high
GSM1817793	5.74366	high
GSM1817794	5.31359	high
GSM1817795	4.82252	high
GSM1817796	4.5472	high
GSM1817797	6.51009	high
GSM1817798	5.09538	high
GSM1817799	6.03966	high
GSM1817800	4.34988	high
GSM1817801	6.30652	high
GSM1817802	5.90115	high
GSM1817803	5.16704	high
GSM1817804	6.44667	high
GSM1817805	6.78379	high
GSM1817806	4.67152	high
GSM1817807	5.14751	high
GSM1817808	4.89067	high
GSM1817809	5.47123	high
GSM1817810	5.58659	high
GSM1817811	5.42524	high
GSM1817812	7.03725	high
GSM1817813	6.72976	high
GSM1817814	7.14995	high
GSM1817815	7.08676	high
GSM1817816	5.33821	high
GSM1817817	4.95702	high
GSM1817818	5.14993	high
GSM1817819	5.64647	high
GSM1817820	6.73847	high
GSM1817821	7.26299	high
GSM1817822	5.87526	high
GSM1817823	5.08621	high
GSM1817824	6.93011	high
GSM1817825	5.42577	high
GSM1817826	6.12307	high
GSM1817827	6.50803	high
GSM1817828	6.56556	high
GSM1817829	5.92539	high
GSM1817830	7.32193	high
GSM1817831	6.01659	high
GSM1817906	6.77352	high
GSM1817907	7.0247	high
GSM1817908	5.80123	high
GSM1817909	5.7125	high
GSM1817910	6.4351	high
GSM1817911	6.52338	high
GSM1817912	6.6342	high
GSM1817914	7.0282	high
GSM1817915	6.39812	high
GSM1817916	5.81001	high
GSM1817917	6.1978	high
GSM1817918	7.49525	high
GSM1817919	6.6363	high
GSM1817920	5.48808	high
GSM1817921	5.47427	high
GSM1817922	7.52761	high
GSM1817923	6.19435	high
GSM1817924	4.56385	high
GSM1817925	7.16996	high
GSM1817926	5.22612	high
GSM1817927	6.62768	high
GSM1817929	6.97993	high
GSM1817930	5.68364	high
GSM1817931	5.59693	high
GSM1817932	5.5083	high
GSM1817933	5.97868	high
GSM1817934	5.95434	high
GSM1817935	5.86526	high
GSM1817936	5.42769	high
GSM1817937	4.8903	high
GSM1817938	4.79825	high
GSM1817939	5.81616	high
GSM1817940	5.99696	high
GSM1817941	6.27993	high
GSM1817942	6.62488	high
GSM1817943	5.28921	high
GSM1817944	6.27187	high
GSM1817945	5.97036	high
GSM1817946	6.34397	high
GSM1817947	7.38683	high
GSM1817948	6.26154	high
GSM1817949	6.33795	high
GSM1817950	6.0706	high
GSM1817951	5.83768	high
GSM1817952	6.47614	high
GSM1817953	5.37994	high
GSM1817954	6.12009	high
GSM1817955	6.52981	high
GSM1817956	4.84673	high
GSM1817957	6.60929	high
GSM1817958	6.07652	high
GSM1817962	6.49089	high
GSM1817963	6.45823	high
GSM1817964	6.80325	high
GSM1817965	8.44209	high
GSM1817966	5.0425	high
GSM1817967	5.67137	high
GSM1817968	6.3167	high
GSM1817969	6.21737	high
GSM1817970	5.76489	high
GSM1817971	5.30608	high
GSM1817972	7.2709	high
GSM1817973	5.63775	high
GSM1817974	5.92463	high
GSM1817975	5.66906	high
GSM1817976	6.14106	high
GSM1817977	7.1542	high
GSM1817978	6.63979	high
GSM1817979	6.45262	high
GSM1817980	5.36062	high
GSM1817981	4.6522	high
GSM1817982	5.95278	high
GSM1817983	5.32842	high
GSM1817984	6.33691	high
GSM1817985	5.89499	high
GSM1817986	4.74698	high
GSM1817987	5.40045	high
GSM1817988	6.57471	high
GSM1817989	7.1686	high
GSM1817990	6.21199	high
GSM1817991	5.82667	high
GSM1817992	6.37722	high
GSM1817993	6.02697	high
GSM1817994	5.63247	high
GSM1817995	6.0167	high
GSM1817996	6.86577	high
GSM1817997	6.52386	high
GSM1817998	6.04265	high
GSM1817999	5.28146	high
